# Supplementary material
Source: publisher figshare collection journal article supplement (https://diabetesjournals.figshare.com/ndownloader/files/34341776)
Supplement: Supplementary file 1 [file 34341776]

## **APPENDIX**

**Appendix 1. Study Selection and Missing Data Materials**

**Appendix 2. ICD-9 and ICD-10 code list to define Diabetes-Specific Events**

**Appendix 3. Calculating Crude Rates and Age-Standardized Rates**

**Appendix 4. Additional National Descriptive Tables**

**Appendix 5. State-Specific All-Cause Diabetes Hospitalization Rates Tables**

**Appendix 6. State-Specific Diabetes Specific Hospitalization Rates Tables**

**Appendix 7. State-Specific All-Cause Diabetes Hospitalization Rates by Race/Ethnicity, Rural/Urban, and Insurance**

**Appendix 8. State-Specific Diabetes-Related Hospitalization Rates by Sex, Rural/Urban, and Insurance**

**Appendix 9. Sensitivity Analyses of Unavailable Data for State-Specific All-Cause Diabetes and Diabetes-Specific Hospitalization Rates by Race/Ethnicity**

### Appendix 1 Figure 1. NIS data selection

similar to each other (ex. Northeast/Mid-Atlantic: Vermont 7.3%, New Jersey 8.1%, Maryland 9.8%, New York 9.4%; Mid/Northwest: Iowa 8.1%, Nebraska 8.0%; Southwest: Arizona 9.7%, Utah 7.7%).

**Appendix 1. Table 1.** Variable Missingness in NIS data, by Year

| Variable Name                      | Variable Type         | Total Number of Missing Observations (%)<br>- NIS |                  |                 |                 | Description                                                                                                                                                                                                                                                           |
|------------------------------------|-----------------------|---------------------------------------------------|------------------|-----------------|-----------------|-----------------------------------------------------------------------------------------------------------------------------------------------------------------------------------------------------------------------------------------------------------------------|
|                                    |                       | 2008                                              | 2011             | 2014            | 2016            |                                                                                                                                                                                                                                                                       |
| Gender                             | Binary                | 218<br>(0.01)                                     | 155<br>(0.01)    | 184<br>(0.01)   | 751<br>(0.05)   | Male/Female                                                                                                                                                                                                                                                           |
| Patient Location - NCHS categories | Ordered Categorical   | 43,157<br>(2.91)*                                 | 30983<br>(1.87)* | 5,227<br>(0.35) | 5,491<br>(0.35) | 1. "Central" Metro counties ≥ 1 million population<br>2. "Fringe" Metro counties ≥1 million population<br>3. Metro counties 250,000-999,999 population<br>4. Metro counties 50,000-249,999<br>5. Micropolitan counties<br>6. Not metropolitan or microplitan counties |
| Primary Payer                      | Unordered Categorical | 2148<br>(0.14)                                    | 4609<br>(0.28)   | 2516<br>(0.17)  | 1833<br>(0.12)  | 1. Medicare<br>2. Medicaid<br>3. Private insurance<br>4. Self-pay<br>5. No charge<br>6. Other                                                                                                                                                                         |
| Total # of Observations            |                       | 1,484,331                                         | 1,657,036        | 1,497,935       | 1,566,504       |                                                                                                                                                                                                                                                                       |

\*Variable missing in >1% of total # of observations for given state-year dataset

Within the NIS data, we observe missingness primarily in the patient location (rural/urban) and primary payer variables. Across all years, approximately 1.53% of observations had at least one missing analytic variable. Our year specific NIS datasets had missingness >1% for patient location in years 2008 and 2011 (**Appendix 1, Table 1**). For these two years of data, we conducted hot-deck imputation using the R package *VIM*.<sup>4</sup> Observations were categorized within domains to allow for imputation of missing observations with data from similar observations. Domains were selected based on correlation with the variable with greatest missingness, patient location. Hospital characteristics, including hospital location, and encounter-level data, including admission type, were used to define our domains. Analysis using the NIS data for 2014 and 2016 were conducted using complete case selection, as missingness for analytic variables fell below 1% for these two years. This criterion excluded 79,905 observations from our final sample, approximately 0.27% of the diabetes-related inpatient stays in the NIS.

**Appendix 1. Table 2.** Characterizing Diabetes Related Hospitalizations within the NIS dataset by Data Missingness; years 2008-2016.

|             | Complete All-Cause Diabetes Hospitalizations |              | Data with Missing Observation for ≥1 variable |              |
|-------------|----------------------------------------------|--------------|-----------------------------------------------|--------------|
| # of Visits | 29,444,406                                   |              | 458,599                                       |              |
| s.e.        | (6,072,056)                                  |              | (75,609)                                      |              |
| Age (Mean)  | 65.4                                         |              | 64.8                                          |              |
| s.e.        | (0.06)                                       |              | (0.60)                                        |              |
|             | %                                            | (95% CI)     | %                                             | (95% CI)     |
| Age Groups  |                                              |              |                                               |              |
| 18-29       | 2.1                                          | (2, 2.1)     | 2.1                                           | (1.8, 2.3)   |
| 30-44       | 7.3                                          | (7.2, 7.4)   | 7.8                                           | (6.9, 8.7)   |
| 45-64       | 35.2                                         | (34.9, 35.4) | 37.8                                          | (35.3, 40.3) |
| 65-74       | 23.1                                         | (23, 23.2)   | 20.0                                          | (19.1, 21)   |
| 75+         | 32.4                                         | (32.1, 32.7) | 32.3                                          | (29.2, 35.4) |
| % Female    | 51.5                                         | (51.4, 51.6) | 47.2                                          | (45.8, 48.5) |
| % Rural     | 18.7                                         | (18, 19.4)   | 28.4                                          | (22.5, 34.4) |
| Region      |                                              |              |                                               |              |
| Midwest     | 23.4                                         | (22.4, 24.4) | 2.9                                           | (1.6, 4.2)   |
| Northeast   | 17.6                                         | (16.6, 18.6) | 77.7                                          | (70.2, 85.1) |
| South       | 41.2                                         | (39.9, 42.5) | 13.4                                          | (8.7, 18.1)  |
| West        | 17.8                                         | (16.9, 18.6) | 6.0                                           | (4, 8)       |
| Insurance   |                                              |              |                                               |              |
| Medicaid    | 11.5                                         | (11.2, 11.8) | 14.0                                          | (11.1, 16.9) |
| Medicare    | 62.6                                         | (62.2, 63)   | 58.5                                          | (55.3, 61.8) |
| Private     | 19.7                                         | (19.4, 20.1) | 20.7                                          | (18, 23.3)   |
| Uninsured   | 3.7                                          | (3.5, 3.8)   | 4.0                                           | (2.9, 5.1)   |
| Other       | 2.5                                          | (2.3, 2.7)   | 2.9                                           | (2.2, 3.5)   |

Dataset generated from National Inpatient Sample data, years 2008, 2011, 2014, 2016. All-cause diabetes hospitalizations include all inpatient stays with a diabetes-related diagnosis, while diabetes-specific visits include all hospitalizations with a principal diagnosis of a diabetes specific condition/complication.

\*continuous variables reported as mean (sd) and proportions presented as proportion (95% C.I.)

We characterized the NIS datasets prior to imputation; data with ≥1 missing observation for our analytic variables and data with complete observations were both characterized (**Appendix 1, Table 2**). Data with missing observations largely resembled the complete data in terms of age distribution, sex. Data with missing observations were predominantly from hospitals within the Northeast Region (77.7%).

**Appendix 1. Table 3.** Variable Missingness in SID datasets with any analytic variable with >1% missingness

| SID Datasets:<br>State and Year | Variable Name |                 |                     |                  | Total # of<br>Observations |
|---------------------------------|---------------|-----------------|---------------------|------------------|----------------------------|
|                                 | Gender        | Race            | Patient<br>Location | Primary<br>Payer |                            |
|                                 | n (%)         | n (%)           | n (%)               | n (%)            |                            |
| <b>Arizona</b>                  |               |                 |                     |                  |                            |
| 2008                            | 1 (0.0)       | 2,129 (1.6) *   | 581 (0.4)           | 1 (0.0)          | 136,665                    |
| <b>Iowa</b>                     |               |                 |                     |                  |                            |
| 2008                            | 5 (0.0)       | 5,775 (18.3) *  | 194 (0.3)           | -                | 69,999                     |
| 2011                            | 1 (0.0)       | 3,274 (4.9) *   | 7 (0.0)             | 48 (0.1)         | 66,921                     |
| 2014                            | 1 (0.0)       | 1,815 (2.9) *   | 6 (0.0)             | -                | 63,462                     |
| 2017                            | -             | 837 (1.2) *     | 7 (0.0)             | -                | 71,197                     |
| <b>Maryland</b>                 |               |                 |                     |                  |                            |
| 2014                            | -             | 18,287 (12.8) * | 400 (0.3)           | 4 (0.0)          | 143,475                    |
| <b>North Carolina</b>           |               |                 |                     |                  |                            |
| 2008                            | -             | 67,399 (33.8) * | 1,252 (0.6)         | 545 (0.3)        | 199,595                    |
| <b>New Jersey</b>               |               |                 |                     |                  |                            |
| 2008                            | -             | 2,489 (1.1) *   | 105 (0.1)           | -                | 220,830                    |
| 2014                            | -             | 3,430 (1.6) *   | 59 (0.0)            | -                | 209,071                    |
| 2017                            | -             | 2,355 (1.1) *   | 79 (0.0)            | -                | 213,858                    |
| <b>New York</b>                 |               |                 |                     |                  |                            |
| 2008                            | 5 (0.0)       | 2,588 (0.5)     | 14,716 (3.0) *      | -                | 486,693                    |
| 2011                            | 4 (0.0)       | 2,121 (0.4)     | 7,995 (1.6) *       | -                | 506,044                    |
| 2014                            | 10            | -               | 7,647 (1.6) *       | -                | 484,811                    |
| 2016                            | 2 (0.0)       | -               | 7,475 (1.5) *       | -                | 497,642                    |
| <b>Utah</b>                     |               |                 |                     |                  |                            |
| 2008                            | -             | 2,169 (8.4) *   | 25 (0.1)            | 20 (0.1)         | 25,853                     |
| 2011                            | 1 (0.0)       | 1,692 (6.0) *   | 29 (0.1)            | 22 (0.1)         | 28,056                     |
| 2014                            | -             | 15,198 (50.0) * | 37 (0.1)            | 13 (0.0)         | 30,430                     |
| 2017                            | 8 (0.0)       | 1,139 (2.9) *   | 94 (0.2)            | 431 (1.1) *      | 39,942                     |
| <b>Vermont</b>                  |               |                 |                     |                  |                            |
| 2008                            | -             | 441 (4.6) *     | 5 (0.1)             | 6 (0.1)          | 9,561                      |
| 2011                            | -             | 186 (1.9) *     | 13 (0.1)            | 205 (2.1) *      | 9,739                      |
| 2014                            | -             | 138 (1.4) *     | 6 (0.1)             | 161 (1.7) *      | 9,689                      |
| 2016                            | 2 (0.0)       | 120 (1.2) *     | 5 (0.1)             | 241 (2.4) *      | 9,901                      |

\* >1% missingness for given variable in the SID dataset for the given state and year

"-" indicates no missing observations for the given dataset-variable

<sup>1</sup>Gender is a binary variable, with values Male or Female

<sup>2</sup>Race is an unordered categorical variable, with values 1) White, 2) Black, 3) Hispanic, 4) Asian, 5) Native, and 6) Mixed Race

<sup>3</sup>Patient Location is an ordered categorical variable, with values "Central" Metro counties ≥ 1 million population, Fringe" Metro counties ≥ 1 million population, Metro counties 250,000-999,999 population, Metro counties 50,000-249,999 population, Micropolitan counties, Not metropolitan or micropolitan

<sup>4</sup>Primary Payer is an unordered categorical variable, with values 1) Medicare, 2) Medicaid, 3) Private Insurance, 4) Self-pay, 5) No charge, 6) Other

We observe missingness in the SID datasets primarily in the race (range: 0.4 – 33.2%), patient location (range: 0.0 – 3.0%), and primary payer variables (range: 0.0 – 2.4%). To impute these missing observations, we used an algorithm proposed and evaluated by Ma et al.,<sup>5</sup> focused explicitly on imputing missing data in the HCUP SID making it an ideal approach for our work. They show that conditional multiple imputation (MI) is the optimal approach when using HCUP

data. We applied their algorithm to impute data for variables missing greater than 1% per year. The algorithm was applied to each state by year dataset. We did not impute value for variables that were completely missing each year and state. Consequently, states such as NE which did not collect race data were not imputed and excluded from our state-specific race estimates.

Consequently, states such as IA that had race data which was not uniformly coded throughout years was not imputed and excluded from our state specific race estimates.

As noted by Ma et al., it is impossible to directly test whether the data are missing not at random (MNAR). For practical purposes we similarly assume that the data are missing at random (MAR) which has been recommended for practical applications especially when there are a large number of predictors of that can be included in the imputation model.<sup>6-8</sup> the HCUP data itself includes many quality predictors but following MA et al., we additionally include information on racial and socioeconomic status distributions from the U.S. Census and information on hospital characteristics the American Hospital Association database.

Conditional MI imputes data variable by variable rather than using a joint distribution. The benefit of this approach that it allows different types of variables to be modeled separately (e.g., categorical versus continuous variables). We use the MICE algorithm in R.<sup>9</sup> As an Markov chain Monte Carlo method we confirmed chain convergence to stationary distributions using convergence plots.

## Appendix 2. ICD-9 and ICD-10 code list to define Diabetes-Specific Events

|                                                                  | ICD-9-CM/PCS                                                                                                                                                                                                                   | ICD-10-CM/PCS                                                                                                                                                                                                                                                                                                                                                                                                                                                                       |
|------------------------------------------------------------------|--------------------------------------------------------------------------------------------------------------------------------------------------------------------------------------------------------------------------------|-------------------------------------------------------------------------------------------------------------------------------------------------------------------------------------------------------------------------------------------------------------------------------------------------------------------------------------------------------------------------------------------------------------------------------------------------------------------------------------|
| Short-Term Complications <sup>1</sup>                            | 250.10, 250.11, 250.12, 250.13, 250.20, 250.21, 250.22, 250.23, 250.30, 250.31, 250.32, 250.33                                                                                                                                 | E10.10, E10.11, E10.65, E10.69, E11.00, E11.01, E11.10, E11.641, E11.65, E11.69, E13.00, E13.01, E13.10, E13.641, E13.65, E13.69                                                                                                                                                                                                                                                                                                                                                    |
| Long-Term Complications <sup>1</sup>                             | 250.4, 250.40, 250.41, 250.42, 250.43, 250.5, 250.51, 250.52, 250.53, 250.6, 250.61, 250.62, 250.63, 250.7, 250.70, 250.71, 250.72, 250.73, 250.8, 250.80, 250.81, 250.82, 250.83, 250.9, 250.90, 250.91, 250.92, 250.93       | E1021, E1029, E10311, E10319, E1036, E1039, E1040, E1051, E1052, E1059, E10618, E10620, E10621, E10622, E10628, E10630, E10638, E10649, E1065, E1069, E108, E118, E1121, E1129, E11311, E1136, E11319, E1139, E1140, E1151, E1152, E1159, E11618, E11620, E11621, E11622, E11628, E11630, E11638, E11649, E1165, E1169, E1321, E1322, E1329, E13311, E13319, E1336, E1339, E1340, E1351, E1352, E1359, E13618, E13620, E13621, E13622, E13628, E13630, E13638, E13649, E1365, E1369 |
| Uncontrolled Diabetes <sup>1</sup>                               | 250.02, 250.03                                                                                                                                                                                                                 | E10.649, E10.65, E11.65, E11.649, E13.649, E13.65                                                                                                                                                                                                                                                                                                                                                                                                                                   |
| Lower Extremity Ulcers, Inflammation, and Infection <sup>2</sup> | 454.0, 707.1, 680.6, 680.7, 681.1, 682.6, 682.7, 711.05, 711.06, 711.07, 730.05, 730.06, 730.07, 730.15, 730.16, 730.17, 730.25, 730.26, 730.27, 730.35, 730.36, 730.37, 730.85, 730.86, 730.87, 730.95, 730.96, 730.97, 785.4 | L97, I83.009, I83.019, 183.029, L02.429, L02.439, L02.629, L02.639, L03.039, L03.049, L03.129, L03.119, M00.059, M00.159, M00.259, M00.859, M00.069, M00.169, M00.269, M00.869, M00.079, M00.179, M00.279, M00.879, M86.159, M86.259, M86.169, M86.269, M86.179, M86.279, M86.659, M86.669, M86.679, M86.9, M90.859, M90.869, M90.879, I96                                                                                                                                          |
| Non-Traumatic Lower Extremity Amputations <sup>3</sup>           | 84.11, 84.12, 84.13, 84.14, 84.15, 84.16, 84.17, 84.18, 84.19<br><br>Excluding traumatic amputations (895, 896, 897)                                                                                                           | 0Y6.P0Z0, 0Y6.P0Z2, 0Y6.P0Z3, 0Y6.Q0Z0, 0Y6.Q0Z1, 0Y6.Q0Z2, 0Y6.Q0Z3, 0Y6.R0Z0, 0Y6.R0Z1, 0Y6.R0Z2, 0Y6.R0Z3, 0Y6.S0Z0, 0Y6.S0Z1, 0Y6.S0Z2, 0Y6.S0Z3, 0Y6.T0Z0, 0Y6.T0Z1, 0Y6.T0Z2,                                                                                                                                                                                                                                                                                                 |

|  |  |                                                                                                                                                                                                                                                                                                                                                                                                                                                                                                                                                                    |
|--|--|--------------------------------------------------------------------------------------------------------------------------------------------------------------------------------------------------------------------------------------------------------------------------------------------------------------------------------------------------------------------------------------------------------------------------------------------------------------------------------------------------------------------------------------------------------------------|
|  |  | 0Y6.T0Z3, 0Y6.U0Z0, 0Y6.U0Z1,<br>0Y6.U0Z2, 0Y6.U0Z3, 0Y6.V0Z0,<br>0Y6.V0Z1, 0Y6.V0Z2, 0Y6.V0Z3,<br>0Y6.W0Z0, 0Y6.W0Z1, 0Y6.W0Z2,<br>0Y6.W0Z3, 0Y6.X0Z0, 0Y6.X0Z1,<br>0Y6.X0Z2, 0Y6.X0Z3, 0Y6.Y0Z0,<br>0Y6.Y0Z1, 0Y6.Y0Z2, 0Y6.Y0Z3,<br>0Y6.M0Z4, 0Y6.M0Z5, 0Y6.M0Z6,<br>0Y6.M0Z7, 0Y6.M0Z8, 0Y6.M0Z9,<br>0Y6.M0ZB, 0Y6.M0ZC, 06Y.M0ZD,<br>06Y.M0ZF, 0Y6.N0Z4, 0Y6.N0Z5,<br>0Y6.N0Z6, 0Y6.N0Z7, 0Y6.N0Z8,<br>0Y6.N0Z9, 0Y6.N0ZB, 0Y6.N0ZC,<br>0Y6.N0ZD, 0Y6.N0ZF, 0Y6.H0Z3,<br>0Y6.J0Z3, 0Y6.F0ZZ, 0Y6.G0ZZ,<br>0Y6.70ZZ, 0Y6.80ZZ, 0Y6.20ZZ,<br>0Y6.30ZZ, 0Y6.40ZZ |
|--|--|--------------------------------------------------------------------------------------------------------------------------------------------------------------------------------------------------------------------------------------------------------------------------------------------------------------------------------------------------------------------------------------------------------------------------------------------------------------------------------------------------------------------------------------------------------------------|

Diabetes-specific discharge records were defined by any record with any of the above listed codes on primary diagnosis.



## Appendix 3. Calculating Crude Rates and Age-Standardized Rates

### Estimating Analogous Denominator Population Estimates using the American Community Survey

Identifying analogous population figures to match subgroup populations broken down by rural/urban status, race, and region in the HCUP data was straightforward. To align insurance definitions with ACS population denominator estimates, if an ACS participant had multiple insurance providers, we considered their age, disability status, and employment status to determine likely primary payer based on a 2018 Medicare User Guide.<sup>10</sup> We recoded insurance categorization in HCUP to align with the ACS estimates using coding guidelines provided by methodology reports published by AHRQ.<sup>11</sup>

The IPUMS ACS provided rural/urban variable had high missingness (>10%). We replaced/imputed the variable with the rural-urban continuum codes published by the United States Department of Agriculture Economic Research Center, which allocates all Public Use Microdata Area data to rural/urban categorization based on metro and non-metro population shares.<sup>12</sup>

### Calculation of Crude Population Utilization Rates by Subpopulation

#### NIS

Counts and standard errors of inpatient events generated using NIS data were weighted and adjusted for complex survey design. HCUP provides discharge weights for the NIS that are used to generate nationally representative estimates of hospitalizations. Trend weights supplied by HCUP were used for years 2008 and 2011, as NIS was redesigned in 2012. Trend weights facilitate comparison of NIS data pre- and post- redesign. Thus, the crude diabetes-related hospitalization rate for a given demographic/insurance group using NIS data is given by equation (1),

$$CR_v = 10,000 \cdot \frac{\sum_{i=1}^n w_i v_i}{N} = 10,000 \cdot \frac{S}{N}$$

Where  $w_i$  is the discharge/trend weight associated with the patient  $i$ , and  $v_i$  is the variable of interest (i.e. rural, 1=rural, 0=not rural).  $N$  represents the population estimate for the variable of interest Barret<sup>13</sup>. Variance for survey-weighted estimates were estimated using Taylor Series Linearization methodology provided in the *Survey* package for R<sup>14</sup>.

We assumed constant denominator population counts,<sup>13</sup> consequently the standard error of the crude rate was calculated as:

$$SE_R = 10,000 SE_S / N$$

Where  $SE_S$  is the standard error of the estimated count.

#### SID

Although the SID are considered a census of inpatient stays within hospitals in a given state, because we are estimating age-standardized estimates and are thus describing a different estimate than the direct rate of use within a state for a given year, we considered the state databases to be samples from a “super-population” for the purposes of variance estimation. To

estimate the standard error of our estimates, we assumed a Poisson distribution of counts, in which the standard error of the number of hospitalizations is equal to the square root of the number of hospitalizations.<sup>15,16</sup> The state databases are not weighted as each file contains nearly all hospitalizations from nearly all hospitals within a given state, thus the crude hospitalization rate using SID data is given by equation (2),

$$R = 10,000 \cdot \frac{S}{N}$$

Where  $S$  is the number of estimated counts, and  $N$  is the corresponding denominator population figure. We assumed constant denominator population counts, consequently the standard error of rates was calculated as:

$$SE_R = 10,000 SE_S / N$$

Where  $SE_S$  is the standard error of the estimated count.

### Standardization of Rates

Standardized rates were calculated using the direct method. Standardized rates reflect rates that would be expected for the observed study population if it had the same population distribution as the standard population.

#### *Standard Population*

All rates excluding age-specific and insurance-specific rates are age standardized using standard population distribution of the U.S. Adult Population. Standard population data of national age distribution was collected from the 2010 CDC National Mortality Database. We estimated the observed crude rate for each of the for each of the following age-specific bins for each demographic group:

Table 1. Standard Population Estimates: 2010 United States Adult Age Distribution

| Age Group | N          |
|-----------|------------|
| 18-29     | 51,773,937 |
| 30-44     | 61,032,705 |
| 45-64     | 81,489,000 |
| 65-74     | 21,713,000 |
| 75+       | 18,554,000 |

Estimates generated from the 2010 CDC National Mortality Database.<sup>17</sup>

#### *Calculating Standardized Rates and Standardized Rate Error Estimates*

We calculated the weighted average of bin-specific observed rates using weights proportional to the percentage of the standard population in age-specific cell.

$$R_{std} = \text{Standardized Rate} = \sum_i w_i P_i$$

Where  $i = 1$  to 5 standard population bins,  $w_i$  is the proportion of the standard population in population group  $i$  of the total standard population and  $P_i$  is the observed age-specific crude rate<sup>18</sup>.

The variance of standardized rates was calculated as:

$$var_{std} = \text{Variance (Standardized Rate)} = \sum_i w_i^2 * \text{Variance (} P_i \text{)}$$

Where  $i = 1$  to 5 standard population bins,  $w_i$  is the proportion of the standard population in population group  $i$  of the total standard population, and  $P_i$  is the estimated age-specific crude rate.

95% confidence intervals for standardized rates were calculated as:

$$(R_{std} - 1.96 * \sqrt{var_{std}} , R_{std} + 1.96 * \sqrt{var_{std}})$$

#### Age and Insurance Specific Rates

Age-specific rates and insurance-specific rates were not standardized because of the age-distributions within these groups. Insurance-specific crude rates were reported because direct standardization is unstable in the case of a zero-cell count (i.e., # of diabetes-specific hospitalizations in Vermont, ages 18-29, Medicare population). Therefore, insurance-specific rates do not control for population age composition and variability between states in these rates may be a result of variation in age distribution between geographies.<sup>19</sup>

## **Appendix 4. Additional National Descriptive Tables**

### Describing the National Sample

We reported mean and standard error for continuous variables and % for categorical variables by year. We also estimated percent change and 95% confidence intervals of population characteristics between 2008 and 2017 for both all-cause diabetes and diabetes-specific inpatient stays.

**Appendix 4. Table 1.** Sample Characteristics of All-Cause and Diabetes-Specific Inpatient Stays from the National Inpatient Sample Dataset, years 2008-2016

|             | All-Cause Diabetes Hospitalizations |              |           |              |           |              |           |              | Diabetes-Specific Hospitalizations |              |          |              |          |              |          |              |
|-------------|-------------------------------------|--------------|-----------|--------------|-----------|--------------|-----------|--------------|------------------------------------|--------------|----------|--------------|----------|--------------|----------|--------------|
|             | 2008                                |              | 2011      |              | 2014      |              | 2016      |              | 2008                               |              | 2011     |              | 2014     |              | 2016     |              |
| # of Visits | 6,950,056                           |              | 7,630,758 |              | 7,450,098 |              | 7,792,188 |              | 622,329                            |              | 683,968  |              | 680,190  |              | 557,394  |              |
| s.e.        | (287,268)                           |              | (313,503) |              | (139,959) |              | (141,735) |              | (25,970)                           |              | (27,903) |              | (12,614) |              | (10,207) |              |
| Age (Mean)  | 65.4                                |              | 65.5      |              | 65.3      |              | 65.3      |              | 56.9                               |              | 56.3     |              | 55.5     |              | 54.1     |              |
| s.e.        | (0.15)                              |              | (0.15)    |              | (0.07)    |              | (0.06)    |              | (0.18)                             |              | (0.19)   |              | (0.09)   |              | (0.09)   |              |
|             | %                                   | (95% CI)     | %         | (95% CI)     | %         | (95% CI)     | %         | (95% CI)     | %                                  | (95% CI)     | %        | (95% CI)     | %        | (95% CI)     | %        | (95% CI)     |
| Age Groups  |                                     |              |           |              |           |              |           |              |                                    |              |          |              |          |              |          |              |
| 18-29       | 2.0                                 | (1.9, 2.1)   | 2.0       | (1.9, 2.1)   | 2.1       | (2, 2.1)     | 2.1       | (2.1, 2.1)   | 8.8                                | (8.5, 9.2)   | 9.3      | (8.9, 9.7)   | 10.1     | (9.8, 10.3)  | 12.3     | (12.1, 12.6) |
| 30-44       | 7.6                                 | (7.3, 7.8)   | 7.3       | (7, 7.5)     | 7.3       | (7.1, 7.4)   | 7.0       | (6.9, 7.1)   | 16.1                               | (15.6, 16.5) | 16.0     | (15.5, 16.5) | 16.3     | (16.1, 16.6) | 16.8     | (16.5, 17.1) |
| 45-64       | 34.8                                | (34.3, 35.4) | 35.5      | (34.9, 36.1) | 35.2      | (35, 35.5)   | 35.0      | (34.7, 35.3) | 39.2                               | (38.7, 39.7) | 40.8     | (40.3, 41.4) | 41.4     | (41.1, 41.7) | 40.8     | (40.4, 41.1) |
| 65-74       | 22.0                                | (21.7, 22.2) | 22.3      | (22.1, 22.5) | 23.7      | (23.5, 23.8) | 24.3      | (24.1, 24.4) | 15.4                               | (15, 15.7)   | 15.2     | (14.9, 15.6) | 15.8     | (15.6, 16)   | 15.5     | (15.2, 15.7) |
| 75+         | 33.6                                | (32.8, 34.4) | 32.9      | (32.2, 33.7) | 31.8      | (31.4, 32.1) | 31.6      | (31.3, 31.9) | 20.6                               | (19.9, 21.2) | 18.7     | (18, 19.3)   | 16.4     | (16.1, 16.7) | 14.6     | (14.3, 15)   |
| % Female    | 52.9                                | (52.5, 53.2) | 52.2      | (51.8, 52.5) | 50.9      | (50.8, 51.1) | 50.0      | (49.9, 50.2) | 47.4                               | (46.9, 47.9) | 45.9     | (45.4, 46.4) | 44.1     | (43.8, 44.4) | 41.9     | (41.5, 42.2) |
| % Rural     | 20.0                                | (18.1, 22)   | 19.4      | (17.4, 21.3) | 17.8      | (16.8, 18.7) | 17.5      | (16.6, 18.3) | 18.7                               | (16.7, 20.7) | 82.0     | (80, 84)     | 16.4     | (15.5, 17.3) | 16.4     | (15.5, 17.2) |
| Region      |                                     |              |           |              |           |              |           |              |                                    |              |          |              |          |              |          |              |
| Midwest     | 23.3                                | (20.2, 26.4) | 23.3      | (20.1, 26.5) | 23.0      | (21.5, 24.5) | 22.8      | (21.3, 24.3) | 21.2                               | (18.3, 24.1) | 21.5     | (18.5, 24.5) | 21.7     | (20.3, 23.1) | 21.2     | (19.8, 22.6) |
| Northeast   | 18.5                                | (15.3, 21.7) | 19.2      | (15.8, 22.6) | 18.1      | (16.8, 19.5) | 18.1      | (16.7, 19.5) | 19.6                               | (16.3, 22.9) | 19.9     | (16.6, 23.2) | 18.0     | (16.6, 19.4) | 17.2     | (15.9, 18.6) |
| South       | 41.2                                | (37.1, 45.3) | 39.6      | (35.6, 43.6) | 41.3      | (39.5, 43.2) | 41.1      | (39.4, 42.9) | 42.3                               | (38.2, 46.5) | 40.0     | (36, 43.9)   | 42.3     | (40.5, 44.2) | 43.4     | (41.6, 45.2) |
| West        | 17.0                                | (14.3, 19.7) | 17.8      | (15, 20.7)   | 17.5      | (16.2, 18.8) | 18.0      | (16.7, 19.2) | 16.9                               | (14.2, 19.6) | 18.6     | (15.6, 21.6) | 18.0     | (16.6, 19.3) | 18.2     | (16.8, 19.5) |
| Insurance   |                                     |              |           |              |           |              |           |              |                                    |              |          |              |          |              |          |              |
| Medicaid    | 9.8                                 | (9.2, 10.5)  | 10.7      | (10, 11.4)   | 12.5      | (12.1, 12.8) | 12.9      | (12.6, 13.3) | 15.8                               | (14.7, 16.8) | 17.1     | (16.2, 18.1) | 21.2     | (20.6, 21.8) | 23.5     | (22.9, 24)   |
| Medicare    | 60.8                                | (59.8, 61.7) | 62.7      | (61.8, 63.7) | 63.3      | (62.8, 63.7) | 63.3      | (62.9, 63.8) | 47.5                               | (46.5, 48.5) | 47.7     | (46.7, 48.7) | 47.3     | (46.8, 47.8) | 44.1     | (43.6, 44.6) |
| Private     | 22.8                                | (22, 23.6)   | 19.8      | (19, 20.6)   | 18.5      | (18.1, 18.9) | 18.2      | (17.8, 18.6) | 24.2                               | (23.3, 25.2) | 21.7     | (20.8, 22.7) | 21.0     | (20.5, 21.5) | 21.6     | (21.1, 22.1) |
| Uninsured   | 3.9                                 | (3.5, 4.3)   | 4.2       | (3.8, 4.6)   | 3.5       | (3.3, 3.7)   | 3.1       | (2.9, 3.3)   | 9.1                                | (8.3, 9.8)   | 10.0     | (9.2, 10.9)  | 8.2      | (7.7, 8.6)   | 8.2      | (7.8, 8.7)   |
| Other       | 2.7                                 | (2.3, 3.1)   | 2.6       | (2.2, 2.9)   | 2.3       | (2.1, 2.4)   | 2.4       | (2.2, 2.6)   | 3.4                                | (2.8, 4.1)   | 3.4      | (2.8, 4.1)   | 2.4      | (2.2, 2.6)   | 2.6      | (2.3, 2.9)   |

Dataset generated from National Inpatient Sample data, years 2008, 2011, 2014, 2016. All-cause diabetes hospitalizations include all inpatient stays with a diabetes-related diagnosis, while diabetes-specific hospitalizations include all inpatient stays with a principal diagnosis of a diabetes specific condition/complication.

Total # of All-Cause Diabetes hospitalizations=29,823,101; total # of diabetes-specific hospitalizations=2,543,882

\*continuous variables reported as mean (sd) and proportions presented as proportion (95% C.I.)

**Appendix 4. Table 2.** Sample Characteristics of All-Cause and Diabetes-Specific Inpatient Stays from the National Inpatient Sample Dataset, years 2008-2016

|                        | All-Cause Diabetes Hospitalizations |              | Diabetes-Specific Hospitalizations |              |
|------------------------|-------------------------------------|--------------|------------------------------------|--------------|
| # of Visits (Weighted) | 29,823,101                          |              | 2,543,882                          |              |
| s.e.                   | (359,101)                           |              | (32,742)                           |              |
| Age (Mean)             | 65.4                                |              | 55.7                               |              |
| s.e.                   | (0.06)                              |              | (0.08)                             |              |
|                        | %                                   | (95% CI)     | %                                  | (95% CI)     |
| Age Groups             |                                     |              |                                    |              |
| 18-29                  | 2.1                                 | (2, 2.1)     | 10.1                               | (9.9, 10.2)  |
| 30-44                  | 7.3                                 | (7.2, 7.4)   | 16.3                               | (16.1, 16.5) |
| 45-64                  | 35.2                                | (34.9, 35.4) | 40.6                               | (40.3, 40.8) |
| 65-74                  | 23.1                                | (23, 23.2)   | 15.5                               | (15.3, 15.6) |
| 75+                    | 32.5                                | (32.2, 32.8) | 17.6                               | (17.4, 17.9) |
| % Female               | 51.5                                | (51.3, 51.6) | 44.9                               | (44.7, 45.2) |
| % Rural                | 18.6                                | (17.9, 19.3) | 17.4                               | (16.7, 18.1) |
| Region                 |                                     |              |                                    |              |
| Midwest                | 23.1                                | (22.1, 24.1) | 21.4                               | (20.5, 22.4) |
| Northeast              | 18.5                                | (17.5, 19.4) | 18.7                               | (17.8, 19.7) |
| South                  | 40.8                                | (39.5, 42.1) | 41.9                               | (40.6, 43.3) |
| West                   | 17.6                                | (16.8, 18.4) | 17.9                               | (17, 18.8)   |
| Insurance              |                                     |              |                                    |              |
| Medicaid               | 11.5                                | (11.2, 11.8) | 19.3                               | (18.9, 19.7) |
| Medicare               | 62.6                                | (62.2, 63)   | 46.7                               | (46.3, 47.2) |
| Private                | 19.8                                | (19.4, 20.1) | 22.1                               | (21.7, 22.5) |
| Uninsured              | 3.7                                 | (3.5, 3.8)   | 8.9                                | (8.6, 9.2)   |
| Other                  | 2.5                                 | (2.3, 2.7)   | 3.0                                | (2.7, 3.3)   |

Dataset generated from National Inpatient Sample data, years 2008, 2011, 2014, 2016. All-cause diabetes hospitalizations include all inpatient stays with a diabetes-related diagnosis, while diabetes-specific visits include all inpatient stays with a principal diagnosis of a diabetes specific condition/complication.

\*continuous variables reported as mean (sd) and proportions presented as proportion (95% C.I.)

Over 2008 to 2016, the count of all cause diabetes hospitalizations increased from 6,950,056 to 7,792,188, with no observed changes in shares represented by region or rurality (**Appendix 4. Table 1**). We observe a slight reduction in the share of all-cause diabetes hospitalizations in the groups: ages 30-44, Females, Private, and Uninsured. We observe increases in the share of all-cause diabetes hospitalizations occurred among those insured with Medicaid, Medicare, and those aged 65-74.

From 2008 to 2016, the count of diabetes specific hospitalizations decreased from 622,329 to 557,394 (**Appendix 4. Table 1**). Patients with diabetes-specific hospitalizations are increasingly younger (18-29) and Medicaid-insured. We observe decreased shares of hospitalizations represented by the groups: 75+, Female, Rural, Medicare, and Privately insured.

Patients admitted for a diabetes-specific reason are younger on average as compared patients conforming to our all-cause diabetes criteria (**Appendix 4. Table 3**). Further, diabetes-specific hospitalizations are characterized by greater proportions of patients insured by either Medicaid and Private insurance, and Uninsured. We observe no difference between groups in terms of rurality and region.

**Appendix 4. Table 3.** Sample Characteristics of All-Cause Diabetes and Diabetes-Specific Inpatient Stays among Adults ages 18-29 from the National Inpatient Sample

|                        | All-Cause Diabetes Hospitalizations |                   |                   |                   | Diabetes-Specific Hospitalizations |                   |                   |                   |
|------------------------|-------------------------------------|-------------------|-------------------|-------------------|------------------------------------|-------------------|-------------------|-------------------|
|                        | 2008                                | 2011              | 2014              | 2016              | 2008                               | 2011              | 2014              | 2016              |
| # of Visits (Weighted) | 141,944                             | 151,783           | 154,130           | 163,724           | 54,919                             | 63,444            | 68,535            | 68,749            |
| s.e.                   | (6842)                              | (7072)            | (3282)            | (3,351)           | (2614)                             | (2779)            | (1449)            | (1423)            |
| Age (Mean)             | 24.4                                | 24.4              | 24.3              | 24.4              | 23.6                               | 23.6              | 23.6              | 23.5              |
| s.e.                   | (0.04)                              | (0.04)            | (0.02)            | (0.02)            | (0.07)                             | (0.06)            | (0.04)            | (0.03)            |
|                        | % (95% CI)                          |                   |                   |                   |                                    |                   |                   |                   |
| % Female               | 64.3 (63.2, 65.4)                   | 62.6 (61.5, 63.7) | 62.7 (62, 63.4)   | 61.2 (60.5, 61.9) | 53.7 (52.2, 55.2)                  | 52.9 (51.4, 54.5) | 53.8 (52.8, 54.8) | 51.8 (50.8, 52.8) |
| % Rural                | 18.1 (16, 20.2)                     | 17.8 (15.6, 20)   | 15.3 (14.4, 16.3) | 15.8 (14.9, 16.6) | 18.8 (16.3, 21.2)                  | 18.4 (15.8, 20.9) | 15.8 (14.7, 16.8) | 17.0 (15.8, 18.1) |
| Region                 |                                     |                   |                   |                   |                                    |                   |                   |                   |
| Midwest                | 21.6 (18, 25.2)                     | 23.4 (19.6, 27.3) | 23.2 (21.5, 25)   | 22.7 (21, 24.4)   | 21.1 (17.6, 24.6)                  | 22.7 (19.2, 26.1) | 23.8 (22, 25.5)   | 23.4 (21.7, 25.1) |
| Northeast              | 16.2 (12.9, 19.4)                   | 15.4 (12.2, 18.6) | 14.9 (13.5, 16.3) | 14.6 (13.3, 15.9) | 15.6 (12.5, 18.7)                  | 15.2 (12.4, 18)   | 13.9 (12.6, 15.2) | 13.3 (12.1, 14.6) |
| South                  | 43.3 (38.5, 48.1)                   | 39.8 (35.3, 44.3) | 41.8 (39.7, 43.9) | 43.1 (41.1, 45.1) | 45.6 (40.8, 50.3)                  | 39.2 (35, 43.4)   | 42.0 (39.9, 44.1) | 44.0 (42, 46)     |
| West                   | 19.0 (15.4, 22.5)                   | 21.4 (17.7, 25)   | 20.1 (18.5, 21.7) | 19.6 (18.1, 21.2) | 17.7 (14.7, 20.8)                  | 22.9 (19, 26.7)   | 20.3 (18.6, 21.9) | 19.2 (17.7, 20.8) |
| Insurance              |                                     |                   |                   |                   |                                    |                   |                   |                   |
| Medicaid               | 36.5 (34.8, 38.2)                   | 38.8 (37, 40.5)   | 45.5 (44.5, 46.4) | 47.3 (46.3, 48.2) | 32.9 (30.8, 35)                    | 35.0 (32.9, 37.1) | 42.8 (41.6, 44.1) | 44.9 (43.7, 46.2) |
| Medicare               | 9.8 (9, 10.6)                       | 9.7 (8.9, 10.5)   | 8.5 (8.1, 8.9)    | 7.9 (7.5, 8.3)    | 6.8 (5.9, 7.8)                     | 7.5 (6.6, 8.5)    | 6.9 (6.3, 7.4)    | 5.0 (4.6, 5.5)    |
| Private                | 31.7 (29.9, 33.4)                   | 29.3 (27.7, 30.9) | 30.0 (29.2, 30.8) | 29.9 (29.1, 30.7) | 29.3 (27.4, 31.2)                  | 28.5 (26.7, 30.2) | 29.8 (28.8, 30.8) | 30.3 (29.3, 31.3) |
| Uninsured              | 17.0 (15.8, 18.1)                   | 16.7 (15.4, 18.1) | 12.8 (12.2, 13.5) | 11.4 (10.8, 12.1) | 25.4 (23.8, 27)                    | 23.0 (21.1, 24.8) | 17.5 (16.5, 18.5) | 15.9 (14.9, 16.8) |
| Other                  | 5.0 (4.2, 5.8)                      | 5.5 (4.6, 6.4)    | 3.2 (2.9, 3.5)    | 3.5 (3.1, 3.9)    | 5.6 (4.4, 6.7)                     | 6.1 (4.8, 7.3)    | 3.0 (2.6, 3.4)    | 3.8 (3.3, 4.4)    |

Dataset generated from National Inpatient Sample data, years 2008, 2011, 2014, 2016. All-cause diabetes hospitalizations include all inpatient stays with a diabetes-related diagnosis, while diabetes-specific visits include all inpatient stays with a principal diagnosis of a diabetes specific condition/complication.

\*continuous variables reported as mean (sd) and proportions presented as proportion (95% C.I.)



## Appendix 5. State-Specific All-Cause Diabetes Hospitalization Rates Tables

**Appendix 5. Table 1.** Rates of All-Cause Diabetes Inpatient Stays per 10,000 Adults in Arizona; Years 2008-2017

| Variable                          | 2008            |             |        |               | 2011            |             |       |               | 2014            |             |       |               | 2017            |             |       |               | 2017-2008         |                  |                |
|-----------------------------------|-----------------|-------------|--------|---------------|-----------------|-------------|-------|---------------|-----------------|-------------|-------|---------------|-----------------|-------------|-------|---------------|-------------------|------------------|----------------|
|                                   | # of I.P. Stays | Denominator | Rate   | (c.i.)        | # of I.P. Stays | Denominator | Rate  | (c.i.)        | # of I.P. Stays | Denominator | Rate  | (c.i.)        | # of I.P. Stays | Denominator | Rate  | (c.i.)        | Absolute $\Delta$ | Percent $\Delta$ | (c.i.)         |
| <b>Age</b>                        |                 |             |        |               |                 |             |       |               |                 |             |       |               |                 |             |       |               |                   |                  |                |
| 18-29                             | 3,710           | 1,077,305   | 34.44  | (33.3,35.6)   | 4,047           | 1,087,985   | 37.2  | (36.1,38.3)   | 3,779           | 1,116,039   | 33.9  | (32.8,34.9)   | 3,824           | 1,171,053   | 32.7  | (31.6,33.7)   | -1.7              | -5.1             | (-8.7, -1.5)   |
| 30-44                             | 12,657          | 1,319,581   | 95.92  | (94.3,97.6)   | 14,251          | 1,249,964   | 114   | (112.1,115.9) | 12,858          | 1,294,687   | 99.3  | (97.6,101)    | 12,680          | 1,318,320   | 96.2  | (94.5,97.9)   | 0.3               | 0.3              | (-1.8, 2.4)    |
| 45-64                             | 49,879          | 1,519,215   | 328.32 | (325.4,331.2) | 55,861          | 1,599,974   | 349.1 | (346.2,352)   | 52,618          | 1,628,864   | 323   | (320.3,325.8) | 51,690          | 1,697,501   | 304.5 | (301.9,307.1) | -23.8             | -7.3             | (-8.3, -6.3)   |
| 65-74                             | 30,225          | 412,979     | 731.88 | (723.6,740.1) | 34,404          | 482,729     | 712.7 | (705.2,720.2) | 34,660          | 577,502     | 600.2 | (593.9,606.5) | 36,469          | 645,040     | 565.4 | (559.6,571.2) | -166.5            | -22.7            | (-23.9, -21.5) |
| 75+                               | 40,194          | 447,485     | 898.22 | (889.4,907)   | 43,365          | 439,111     | 987.6 | (978.3,996.9) | 41,344          | 493,146     | 838.4 | (830.3,846.5) | 44,841          | 552,520     | 811.6 | (804.1,819.1) | -86.6             | -9.6             | (-10.7, -8.5)  |
| <b>Sex</b>                        |                 |             |        |               |                 |             |       |               |                 |             |       |               |                 |             |       |               |                   |                  |                |
| Female                            | 68,108          | 2,405,053   | 268.31 | (266.3,270.4) | 75,210          | 2,463,272   | 285.2 | (283.2,287.3) | 69,780          | 2,597,140   | 244.9 | -243246.7     | 69,829          | 2,730,465   | 227.3 | (225.6,229)   | -41               | -15.3            | (-16.1, -14.5) |
| Male                              | 68,557          | 2,371,512   | 306.62 | (304.3,308.9) | 76,718          | 2,396,491   | 324.7 | (322.4,327)   | 75,479          | 2,513,098   | 293.5 | (291.4,295.6) | 79,675          | 2,653,969   | 285.5 | (283.5,287.5) | -21.1             | -6.9             | (-7.7, -6.1)   |
| <b>Race/Ethnicity<sup>d</sup></b> |                 |             |        |               |                 |             |       |               |                 |             |       |               |                 |             |       |               |                   |                  |                |
| White, Non-Hispanic               | -               | -           | -      | -             | -               | -           | -     | -             | 91,281          | 3123174     | 230.9 | (229.4,232.5) | 94,761          | 3,201,040   | 225.7 | (224.2,227.2) | -5.2              | -2.3             | (-3.1, -1.5)   |
| Black, Non-Hispanic               | -               | -           | -      | -             | -               | -           | -     | -             | 7,493           | 202353      | 457   | (446.4,467.7) | 8,208           | 219,796     | 457.5 | (447.4,467.7) | 0.5               | 0.1              | (-2.6, 2.8)    |
| Hispanic                          | -               | -           | -      | -             | -               | -           | -     | -             | 31,427          | 1353068     | 333.9 | (330.1,337.8) | 33,819          | 1,480,422   | 317.2 | (313.7,320.7) | -16.7             | -5.0             | (-6.3, -3.7)   |
| <b>Rural/Urban</b>                |                 |             |        |               |                 |             |       |               |                 |             |       |               |                 |             |       |               |                   |                  |                |
| Rural                             | 16,925          | 460,355     | 323.39 | (318.4,328.4) | 18,715          | 470,682     | 338   | -333342.9     | 9,147           | 529,619     | 145.2 | (142.1,148.3) | 8,625           | 535,281     | 131.1 | (128.2,134)   | -192.3            | -59.5            | (-61, -58)     |
| Urban                             | 119,740         | 4,316,210   | 281.09 | (279.5,282.7) | 133,213         | 4,389,081   | 299.1 | (297.5,300.7) | 136,112         | 4,580,619   | 284.2 | (282.7,285.7) | 140,879         | 4,849,153   | 270.8 | (269.4,272.3) | -10.3             | -3.7             | (-4.3, -3.1)   |
| <b>Insurance</b>                  |                 |             |        |               |                 |             |       |               |                 |             |       |               |                 |             |       |               |                   |                  |                |
| Medicaid                          | 18,796          | 337,252     | 557.33 | (549.4,565.3) | 23,598          | 471,844     | 500.1 | (493.7,506.5) | 24,537          | 496,345     | 494.4 | (488.2,500.5) | 28,532          | 594,676     | 479.8 | (474.2,485.4) | -77.5             | -13.9            | (-15.4, -12.4) |
| Medicare                          | 78,194          | 945,447     | 827.05 | (821.3,832.9) | 91,211          | 1,018,680   | 895.4 | (889.6,901.2) | 87,802          | 1,171,311   | 749.6 | (744.6,754.6) | 93,099          | 1,294,597   | 719.1 | (714.5,723.8) | -107.9            | -13.1            | (-13.9, -12.3) |
| Private                           | 30,798          | 2,445,558   | 125.94 | (124.5,127.3) | 26,341          | 2,295,628   | 114.7 | (113.4,116.1) | 24,746          | 2,500,398   | 99    | (97.7,100.2)  | 21,806          | 2,714,220   | 80.3  | (79.3,81.4)   | -45.6             | -36.2            | (-37.3, -35.1) |
| Uninsured                         | 4,079           | 874,954     | 46.62  | (45.2,48.1)   | 7,379           | 894,434     | 82.5  | (80.6,84.4)   | 5,297           | 744,112     | 71.2  | (69.3,73.1)   | 3,023           | 583,927     | 51.8  | (49.9,53.6)   | 5.2               | 11.1             | (7, 15.2)      |
| Total                             | 136,665         | 4,776,565   | 285.42 | (283.9,286.9) | 151,928         | 4,859,763   | 303.3 | (301.7,304.8) | 145,259         | 5,110,238   | 267.4 | -266268.8     | 149,504         | 5,384,434   | 254.6 | (253.2,255.9) | -30.8             | -10.8            | (-11.4, -10.2) |

<sup>a</sup> Total # of Inpatient Stays N=583,356

<sup>b</sup> All rates except Age-Specific and Insurance-Specific rates are age-standardized to the 2010 US Adult Population using data from the CDC Mortality Database

<sup>c</sup> The transition from ICD-9 CM/PCS to ICD-10 CM/PCS coding occurred in third quarter of 2015. Estimates reported from years post-2015 were estimated using ICD-10 codes and may not be directly comparable to rates estimated pre-2015.

<sup>d</sup> Value of - indicates estimate was not reported. All estimates n<=10 events or RSE>=30% were not reported. Additionally, HCUP prioritizes ethnicity when coding the uniform Race variable, AZ did not provide an ethnicity variable in 2008 and 2011. Percent change estimates for race/ethnicity subgroups for AZ were calculated using 2014 as the reference year.

**Appendix 5. Table 2. Rates of All-Cause Diabetes Inpatient Stays per 10,000 Adults in Florida; Years 2008-2017**

| Variable              | 2008            |                   |                            | 2011            |                   |                            | 2014            |                   |                          | 2017            |                   |                           | 2017-2008         |                  |                   |
|-----------------------|-----------------|-------------------|----------------------------|-----------------|-------------------|----------------------------|-----------------|-------------------|--------------------------|-----------------|-------------------|---------------------------|-------------------|------------------|-------------------|
|                       | # of I.P. Stays | Denominator       | Rate (c.i.)                | # of I.P. Stays | Denominator       | Rate (c.i.)                | # of I.P. Stays | Denominator       | Rate (c.i.)              | # of I.P. Stays | Denominator       | Rate (c.i.)               | Absolute $\Delta$ | Percent $\Delta$ | (c.i.)            |
| <b>Age</b>            |                 |                   |                            |                 |                   |                            |                 |                   |                          |                 |                   |                           |                   |                  |                   |
| 18-29                 | 8,716           | 2,783,157         | 31.3 (30.7,32)             | 9,946           | 2,985,810         | 33.3 (32.7,34)             | 10,870          | 3,080,075         | 35.3 (34.6,36)           | 12,272          | 3,158,262         | 38.9 (38.2,39.5)          | 7.6               | 24.3             | (21.7, 26.9)      |
| 30-44                 | 35,360          | 3,590,210         | 98.5 (97.5,99.5)           | 36,996          | 3,545,422         | 104.3 (103.3,105.4)        | 39,032          | 3,668,380         | 106.4 (105.3,107.5)      | 41,005          | 3,857,687         | 106.3 (105.3,107.3)       | 7.8               | 7.9              | (6.7, 9.1)        |
| 45-64                 | 166,922         | 4,764,788         | 350.3 (348.6,352)          | 188,873         | 5,173,375         | 365.1 (363.4,366.7)        | 200,979         | 5,296,412         | 379.5 (377.8,381.1)      | 216,462         | 5,554,964         | 389.7 (388, 391.3)        | 39.4              | 11.2             | (10.6, 11.8)      |
| 65-74                 | 115,266         | 1,419,169         | 812.2 (807.5,816.9)        | 129,930         | 1,642,006         | 791.3 (787, 795.6)         | 143,880         | 1,928,373         | 746.1 (742.3,750)        | 158,551         | 2,139,804         | 741 (737.3,744.6)         | -71.2             | -8.8             | (-9.4, -8.2)      |
| 75+                   | 187,399         | 1,762,049         | 1064 (1,058.7,1,068.3)     | 205,865         | 1,718,192         | 1198.1 (1193, 1203.3)      | 214,424         | 1,868,050         | 1147.8 (1143, 1152.7)    | 237,735         | 2,074,993         | 1145.7 (1141.1,1150.3)    | 82.2              | 7.7              | (7.2, 8.2)        |
| <b>Sex</b>            |                 |                   |                            |                 |                   |                            |                 |                   |                          |                 |                   |                           |                   |                  |                   |
| Female                | 261,110         | 7,374,758         | 295.9 (294.7,297)          | 288,872         | 7,787,443         | 310.1 (308.9,311.2)        | 303,166         | 8,192,489         | 304.7 (303.6,305.8)      | 322,388         | 8,671,836         | 300.4 (299.3,301.5)       | 4.5               | 1.5              | (1.1, 1.9)        |
| Male                  | 252,553         | 6,944,615         | 335.7 (334.4,337)          | 282,738         | 7,277,362         | 353.1 (351.8,354.4)        | 306,019         | 7,648,801         | 354.3 (353, 355.5)       | 343,637         | 8,113,874         | 366.5 (365.3,367.8)       | 30.8              | 9.2              | (8.7, 9.7)        |
| <b>Race/Ethnicity</b> |                 |                   |                            |                 |                   |                            |                 |                   |                          |                 |                   |                           |                   |                  |                   |
| White, Non-Hispanic   | -               | -                 | -                          | 353,204         | 9124354           | 289.1 (288.1,290.1)        | 369,085         | 9299079           | 290.1 (289.1,291.1)      | 398,262         | 9,542,674         | 299.2 (298.2,300.2)       | 10.1              | 3.5              | (3.1, 3.9)        |
| Black, Non-Hispanic   | -               | -                 | -                          | 108,828         | 2116845           | 613.2 (609.5,616.9)        | 117,184         | 2272110           | 589.4 (586, 592.8)       | 130,426         | 2,399,728         | 601.6 (598.3,604.9)       | -11.6             | -1.9             | (-2.6, -1.2)      |
| Hispanic              | -               | -                 | -                          | 93,346          | 3232996           | 331.5 (329.4,333.6)        | 102,572         | 3598495           | 315.9 (314, 317.8)       | 115,561         | 4,062,171         | 300.6 (298.9,302.4)       | -30.9             | -9.3             | (-10, -8.6)       |
| <b>Rural/Urban</b>    |                 |                   |                            |                 |                   |                            |                 |                   |                          |                 |                   |                           |                   |                  |                   |
| Rural                 | 41,026          | 1,020,740         | 344 (340.6,347.4)          | 46,238          | 1,051,316         | 347 (343.8,350.3)          | 28,575          | 963,272           | 240.5 (237.6,243.4)      | 32,051          | 998,650           | 256.6 (253.6,259.5)       | -87.4             | -25.4            | (-26.5, -24.3)    |
| Urban                 | 472,637         | 13,298,633        | 311.1 (310.2,312)          | 525,372         | 14,013,489        | 327.9 (327, 328.8)         | 580,610         | 14,878,018        | 333.3 (332.4,334.2)      | 633,974         | 15,787,060        | 336.1 (335.2,336.9)       | 25                | 8.0              | (7.7, 8.3)        |
| <b>Insurance</b>      |                 |                   |                            |                 |                   |                            |                 |                   |                          |                 |                   |                           |                   |                  |                   |
| Medicaid              | 41,141          | 519,576           | 791.8 (784.2,799.5)        | 55,735          | 790,678           | 704.9 (699, 710.8)         | 60,681          | 973,616           | 623.3 (618.3,628.2)      | 61,429          | 1,010,681         | 607.8 (603, 612.6)        | -184              | -23.2            | (-24.2, -22.2)    |
| Medicare              | 339,950         | 3,436,830         | 989.1 (985.8,992.5)        | 390,278         | 3,674,467         | 1062.1 (1058.8,1065.5)     | 417,456         | 4,124,206         | 1012.2 (1009.1,1015.3)   | 456,013         | 4,525,869         | 1007.6 (1004.6,1010.5)    | 18.5              | 1.9              | (1.5, 2.3)        |
| Private               | 89,731          | 6,973,815         | 128.7 (127.8,129.5)        | 77,595          | 6,712,132         | 115.6 (114.8,116.4)        | 81,683          | 7,392,875         | 110.5 (109.7,111.2)      | 93,605          | 8,391,459         | 111.5 (110.8,112.3)       | -17.2             | -13.4            | (-14.1, -12.7)    |
| Uninsured             | 27,882          | 3,117,459         | 89.4 (88.4,90.5)           | 31,822          | 3,570,343         | 89.1 (88.1,90.1)           | 32,043          | 3,000,154         | 106.8 (105.6,108)        | 34,918          | 2,506,717         | 139.3 (137.8,140.8)       | 49.9              | 55.8             | (54.2, 57.4)      |
| <b>Total</b>          | <b>513,663</b>  | <b>14,319,373</b> | <b>313.6 (312.7,314.4)</b> | <b>571,610</b>  | <b>15,064,805</b> | <b>329.4 (328.5,330.2)</b> | <b>609,185</b>  | <b>15,841,290</b> | <b>327.2 (326.3,328)</b> | <b>666,025</b>  | <b>16,785,710</b> | <b>330.8 (330, 331.6)</b> | <b>17.2</b>       | <b>5.5</b>       | <b>(5.2, 5.8)</b> |

<sup>a</sup> Total # of Inpatient Stays N=2,360,483

<sup>b</sup> All rates except Age-Specific and Insurance-Specific rates are age-standardized to the 2010 US Adult Population using data from the CDC Mortality Database

<sup>c</sup> The transition from ICD-9 CM/PCS to ICD-10 CM/PCS coding occurred in third quarter of 2015. Estimates reported from years post-2015 were estimated using ICD-10 codes and may not be directly comparable to rates estimated pre-2015.

<sup>d</sup> Value of - indicates estimate was not reported. All estimates n<=10 events or RSE>=30% were not reported. Additionally, HCUP prioritizes ethnicity when coding the uniform Race variable, FL, IA, and NC did not provide an ethnicity variable in 2008. Percent change estimates for race/ethnicity subgroups in states FL, IA, and NC used 2011 as the reference year.

**Appendix 5. Table 3. Rates of All-Cause Diabetes Inpatient Stays per 10,000 Adults in Iowa; Years 2008-2017**

| Variable              | 2008            |                  |              |                      | 2011            |                  |              |                      | 2014            |                  |              |                      | 2017            |                  |              |                      | 2017-2008         |                  |                     |
|-----------------------|-----------------|------------------|--------------|----------------------|-----------------|------------------|--------------|----------------------|-----------------|------------------|--------------|----------------------|-----------------|------------------|--------------|----------------------|-------------------|------------------|---------------------|
|                       | # of I.P. Stays | Denominator      | Rate         | (c.i.)               | # of I.P. Stays | Denominator      | Rate         | (c.i.)               | # of I.P. Stays | Denominator      | Rate         | (c.i.)               | # of I.P. Stays | Denominator      | Rate         | (c.i.)               | Absolute $\Delta$ | Percent $\Delta$ | (c.i.)              |
| <b>Age</b>            |                 |                  |              |                      |                 |                  |              |                      |                 |                  |              |                      |                 |                  |              |                      |                   |                  |                     |
| 18-29                 | 1,075           | 514,831          | 20.9         | (19.6,22.1)          | 1,085           | 508,767          | 21.3         | (20.1,22.6)          | 1,159           | 511,098          | 22.7         | (21.4,24.0)          | 1,372           | 519,925          | 26.4         | (25.0,27.8)          | 5.5               | 26.4             | (18.8, 34)          |
| 30-44                 | 3,969           | 554,642          | 71.6         | (69.3,73.8)          | 3,682           | 552,221          | 66.7         | (64.5,68.8)          | 3,407           | 561,554          | 60.7         | (58.6,62.7)          | 4,273           | 569,426          | 75.0         | (72.8,77.3)          | 3.5               | 4.9              | (1.2, 8.6)          |
| 45-64                 | 20,134          | 787,644          | 255.6        | (252.1,259.2)        | 20,446          | 820,979          | 249.0        | (245.6,252.5)        | 19,762          | 817,938          | 241.6        | (238.2,245.0)        | 21,913          | 802,022          | 273.2        | (269.6,276.8)        | 17.6              | 6.9              | (5.2, 8.6)          |
| 65-74                 | 15,415          | 192,149          | 802.2        | (789.6,814.9)        | 14,847          | 210,963          | 703.8        | (692.5,715.1)        | 14,653          | 241,275          | 607.3        | (597.5,617.2)        | 17,230          | 267,215          | 644.8        | (635.2,654.4)        | -157.4            | -19.6            | (-21.3, -17.9)      |
| 75+                   | 29,406          | 248,618          | 1182.8       | (1169.3,1196.3)      | 26,861          | 246,990          | 1087.5       | (1074.5,1100.5)      | 24,481          | 250,593          | 976.9        | (964.7,989.2)        | 26,409          | 256,554          | 1029.4       | (1017.0,1041.8)      | -153.4            | -13.0            | (-14.3, -11.7)      |
| <b>Sex</b>            |                 |                  |              |                      |                 |                  |              |                      |                 |                  |              |                      |                 |                  |              |                      |                   |                  |                     |
| Female                | 36,605          | 1,178,886        | 264.6        | (261.8,267.4)        | 34,794          | 1,193,978        | 248.2        | (245.5,250.8)        | 32,106          | 1,212,257        | 224.1        | (221.6,226.6)        | 35,016          | 1,227,627        | 240.6        | (238.0,243.1)        | -24               | -9.1             | (-10.3, -7.9)       |
| Male                  | 33,394          | 1,118,998        | 303.8        | (300.5,307.1)        | 32,127          | 1,145,942        | 276.8        | (273.7,279.8)        | 31,356          | 1,170,201        | 257.2        | (254.4,260.1)        | 36,181          | 1,187,515        | 287.9        | (284.9,290.9)        | -15.9             | -5.2             | (-6.4, -4)          |
| <b>Race/Ethnicity</b> |                 |                  |              |                      |                 |                  |              |                      |                 |                  |              |                      |                 |                  |              |                      |                   |                  |                     |
| White, Non-Hispanic   | -               | -                | -            | -                    | 62,571          | 2118989          | 254.3        | (252.3,256.3)        | 58,546          | 2131366          | 232.2        | (230.3,234.2)        | 64,793          | 2,128,722        | 252.9        | (250.9,254.8)        | -1.4              | -0.6             | (-1.5, 0.3)         |
| Black, Non-Hispanic   | -               | -                | -            | -                    | 2,617           | 53633            | 693.6        | (665.3,722.0)        | 2,645           | 68893            | 521.8        | (500.9,542.6)        | 3,365           | 67,976           | 630.5        | (608.4,652.6)        | -63.1             | -9.1             | (-13.5, -4.7)       |
| Hispanic              | -               | -                | -            | -                    | 800             | 90769            | 176.0        | (160.4,191.5)        | 1,268           | 102599           | 228.6        | (214.0,243.2)        | 1,624           | 114,337          | 325.4        | (305.8,345)          | 149.4             | 84.9             | (72.9, 96.9)        |
| <b>Rural/Urban</b>    |                 |                  |              |                      |                 |                  |              |                      |                 |                  |              |                      |                 |                  |              |                      |                   |                  |                     |
| Rural                 | 35,660          | 1,159,789        | 251.8        | (249.1,254.5)        | 33,204          | 1,155,609        | 230.9        | (228.3,233.4)        | 29,576          | 917,459          | 253.2        | (250.3,256.2)        | 31,921          | 907,571          | 276.4        | (273.3,279.6)        | 24.7              | 9.8              | (8.4, 11.2)         |
| Urban                 | 34,339          | 1,138,095        | 315.4        | (312, 318.7)         | 33,717          | 1,184,311        | 295.2        | (292.1,298.4)        | 33,886          | 1,464,999        | 227.0        | (224.6,229.4)        | 39,276          | 1,507,571        | 250.3        | (247.8,252.8)        | -65.1             | -20.6            | (-21.7, -19.5)      |
| <b>Insurance</b>      |                 |                  |              |                      |                 |                  |              |                      |                 |                  |              |                      |                 |                  |              |                      |                   |                  |                     |
| Medicaid              | 4,568           | 96,410           | 473.8        | (460.1,487.6)        | 4,994           | 114,769          | 435.2        | (423.1,447.3)        | 5,907           | 161,225          | 366.4        | (357.0,375.7)        | 7,393           | 197,985          | 373.4        | (364.9,381.9)        | -100.4            | -21.2            | (-24.1, -18.3)      |
| Medicare              | 50,055          | 487,455          | 1026.9       | (1017.9,1,035.9)     | 46,962          | 509,930          | 920.9        | (912.6,929.3)        | 45,290          | 551,939          | 820.6        | (813,828.10)         | 50,752          | 573,828          | 884.5        | (876.8,892.2)        | -142.4            | -13.9            | (-14.9, -12.9)      |
| Private               | 13,087          | 1,472,585        | 88.9         | (87.4,90.4)          | 12,878          | 1,443,397        | 89.2         | (87.7,90.8)          | 10,988          | 1,489,539        | 73.8         | (72.4,75.2)          | 11,785          | 1,498,814        | 78.6         | (77.2,80.1)          | -10.2             | -11.5            | (-13.5, -9.5)       |
| Uninsured             | 1,552           | 221,821          | 70.0         | (66.5,73.5)          | 1,355           | 244,747          | 55.4         | (52.4,58.3)          | 747             | 159,690          | 46.8         | (43.4,50.1)          | 663             | 118,942          | 55.7         | (51.5,60.0)          | -14.2             | -20.3            | (-26.9, -13.7)      |
| <b>Total</b>          | <b>69,999</b>   | <b>2,297,884</b> | <b>279.9</b> | <b>(277.8,282.0)</b> | <b>66,921</b>   | <b>2,339,920</b> | <b>259.8</b> | <b>(257.8,261.8)</b> | <b>63,462</b>   | <b>2,382,458</b> | <b>238.2</b> | <b>(236.4,240.1)</b> | <b>71,197</b>   | <b>2,415,142</b> | <b>261.4</b> | <b>(259.4,263.3)</b> | <b>-18.5</b>      | <b>-6.6</b>      | <b>(-7.5, -5.7)</b> |

<sup>a</sup> Total # of Inpatient Stays N=271,579

<sup>b</sup> All rates except Age-Specific and Insurance-Specific rates are age-standardized to the 2010 US Adult Population using data from the CDC Mortality Database

<sup>c</sup> The transition from ICD-9 CM/PCS to ICD-10 CM/PCS coding occurred in third quarter of 2015. Estimates reported from years post-2015 were estimated using ICD-10 codes and may not be directly comparable to rates estimated pre-2015.

<sup>d</sup> Value of - indicates estimate was not reported. All estimates n<=10 events or RSE>=30% were not reported. Additionally, HCUP prioritizes ethnicity when coding the uniform Race variable, FL, IA, and NC did not provide an ethnicity variable in 2008. Percent change estimates for race/ethnicity subgroups in states FL, IA, and NC used 2011 as the reference year.

**Appendix 5. Table 4.** Rates of All-Cause Diabetes Inpatient Stays per 10,000 Adults in Kentucky; Years 2008-2017

| Variable              | 2008            |             |                        | 2011            |             |                        |        | 2014            |             |                        |        | 2017            |             |                        | 2017-2008         |                  |                |
|-----------------------|-----------------|-------------|------------------------|-----------------|-------------|------------------------|--------|-----------------|-------------|------------------------|--------|-----------------|-------------|------------------------|-------------------|------------------|----------------|
|                       | # of I.P. Stays | Denominator | Rate (c.i.)            | # of I.P. Stays | Denominator | Rate                   | (c.i.) | # of I.P. Stays | Denominator | Rate                   | (c.i.) | # of I.P. Stays | Denominator | Rate (c.i.)            | Absolute $\Delta$ | Percent $\Delta$ | (c.i.)         |
| <b>Age</b>            |                 |             |                        |                 |             |                        |        |                 |             |                        |        |                 |             |                        |                   |                  |                |
| 18-29                 | 2,756           | 686,355     | 40.2 (38.7,41.7)       | 2,824           | 701,845     | 40.2 (38.8,41.7)       |        | 2,785           | 705,491     | 39.5 (38,40.9)         |        | 3,035           | 723,004     | 42 (40.5,43.5)         | 1.8               | 4.5              | (-0.1, 9.1)    |
| 30-44                 | 11,230          | 875,762     | 128.2 (125.9,130.6)    | 11,762          | 854,038     | 137.7 (135.2,140.2)    |        | 11,132          | 844,789     | 131.8 (129.3,134.2)    |        | 11,020          | 828,086     | 133.1 (130.6,135.6)    | 4.9               | 3.8              | (1.5, 6.1)     |
| 45-64                 | 50,737          | 1,141,903   | 444.3 (440.5,448.2)    | 55,571          | 1,197,727   | 464 (460.1,467.8)      |        | 54,328          | 1,195,181   | 454.6 (450.7,458.4)    |        | 56,700          | 1,181,324   | 480 (476.4,483.9)      | 35.7              | 8.0              | (6.9, 9.1)     |
| 65-74                 | 31,235          | 282,371     | 1106.2 (1093.9,1118.4) | 35,304          | 310,591     | 1136.7 (1124.8,1148.5) |        | 33,839          | 361,611     | 935.8 (925.8,945.8)    |        | 37,914          | 388,350     | 976.3 (966.5,986.1)    | -129.9            | -11.7            | (-12.9, -10.5) |
| 75+                   | 40,437          | 278,395     | 1452.5 (1438.3,1466.7) | 43,449          | 283,281     | 1533.8 (1519.4,1548.2) |        | 40,435          | 292,355     | 1383.1 (1369.6,1396.6) |        | 44,326          | 320,578     | 1382.7 (1369.8,1395.6) | -69.8             | -4.8             | (-5.9, -3.7)   |
| <b>Sex</b>            |                 |             |                        |                 |             |                        |        |                 |             |                        |        |                 |             |                        |                   |                  |                |
| Female                | 75,444          | 1,687,215   | 419.1 (416.1,422.1)    | 80,893          | 1,723,771   | 433.2 (430.2,436.2)    |        | 75,508          | 1,745,872   | 391.5 (388.7,394.3)    |        | 79,220          | 1,769,085   | 396.4 (393.7,399.2)    | -22.7             | -5.4             | (-6.2, -4.6)   |
| Male                  | 60,951          | 1,577,571   | 410.8 (407.6,414.1)    | 68,017          | 1,623,711   | 435.1 (431.8,438.4)    |        | 67,011          | 1,653,555   | 405.8 (402.7,408.9)    |        | 73,775          | 1,672,257   | 428.6 (425.5,431.7)    | 17.8              | 4.3              | (3.4, 5.2)     |
| <b>Race/Ethnicity</b> |                 |             |                        |                 |             |                        |        |                 |             |                        |        |                 |             |                        |                   |                  |                |
| White, Non-Hispanic   | 120,462         | 2914443     | 397.5 (395.3,399.8)    | 133,985         | 2936726     | 427.9 (425.6,430.2)    |        | 126,747         | 2963813     | 390.3 (388.1,392.4)    |        | 135,918         | 2,974,103   | 404.7 (402.6,406.9)    | 7.2               | 1.8              | (1.2, 2.4)     |
| Black, Non-Hispanic   | 10,808          | 228993      | 561.4 (550.5,572.3)    | 12,865          | 256770      | 596.2 (585.7,606.7)    |        | 12,715          | 257591      | 555.9 (546.1,565.7)    |        | 14,594          | 267,804     | 601.4 (591.6,611.3)    | 40                | 7.1              | (4.9, 9.3)     |
| Hispanic              | 544             | 60828       | 214.1 (192.4,235.8)    | 840             | 81175       | 181.9 (168.5,195.4)    |        | 1,683           | 89378       | 421 (397.8,444.3)      |        | 1,166           | 95,903      | 260.6 (242.1,279)      | 46.5              | 21.7             | (10.5, 32.9)   |
| <b>Rural/Urban</b>    |                 |             |                        |                 |             |                        |        |                 |             |                        |        |                 |             |                        |                   |                  |                |
| Rural                 | 69,873          | 1,456,541   | 460.2 (456.8,463.6)    | 75,718          | 1,450,065   | 485.6 (482.2,489.1)    |        | 70,714          | 1,301,804   | 490.4 (486.7,494)      |        | 73,622          | 1,300,430   | 497.3 (493.6,500.9)    | 37.1              | 8.1              | (7.2, 9)       |
| Urban                 | 66,522          | 1,808,245   | 375 (372.1,377.8)      | 73,192          | 1,897,417   | 389.1 (386.3,391.9)    |        | 71,805          | 2,097,623   | 334.9 (332.4,337.3)    |        | 79,373          | 2,140,912   | 353.7 (351.2,356.2)    | -21.3             | -5.7             | (-6.6, -4.8)   |
| <b>Insurance</b>      |                 |             |                        |                 |             |                        |        |                 |             |                        |        |                 |             |                        |                   |                  |                |
| Medicaid              | 16,260          | 200,703     | 810.2 (797.7,822.6)    | 17,711          | 212,517     | 833.4 (821.1,845.7)    |        | 22,822          | 375,297     | 608.1 (600.2,616)      |        | 24,654          | 512,109     | 481.4 (475.4,487.4)    | -328.8            | -40.6            | (-42, -39.2)   |
| Medicare              | 84,417          | 701,873     | 1202.7 (1194.6,1210.9) | 98,177          | 761,230     | 1289.7 (1281.6,1297.8) |        | 90,183          | 819,549     | 1100.4 (1093.2,1107.6) |        | 100,053         | 871,862     | 1147.6 (1140.5,1154.7) | -55.1             | -4.6             | (-5.3, -3.9)   |
| Private               | 28,108          | 1,788,932   | 157.1 (155.3,159)      | 24,618          | 1,709,024   | 144 (142.2,145.8)      |        | 25,206          | 1,776,836   | 141.9 (140.1,143.6)    |        | 24,174          | 1,773,309   | 136.3 (134.6,138)      | -20.8             | -13.2            | (-14.5, -11.9) |
| Uninsured             | 4,304           | 513,674     | 83.8 (81.3,86.3)       | 6,697           | 592,445     | 113 (110.3,115.7)      |        | 2,066           | 361,709     | 57.1 (54.7,59.6)       |        | 1,465           | 217,001     | 67.5 (64.1,71)         | -16.3             | -19.5            | (-23.9, -15.1) |
| Total                 | 136,395         | 3,264,786   | 413.9 (411.7,416.1)    | 148,910         | 3,347,482   | 432.4 (430.2,434.6)    |        | 142,519         | 3,399,427   | 396.9 (394.9,399)      |        | 152,995         | 3,441,342   | 410.4 (408.3,412.4)    | -3.5              | -0.8             | (-1.4, -0.2)   |

<sup>a</sup> Total # of Inpatient Stays N=580,819

<sup>b</sup> All rates except Age-Specific and Insurance-Specific rates are age-standardized to the 2010 US Adult Population using data from the CDC Mortality Database

<sup>c</sup> The transition from ICD-9 CM/PCS to ICD-10 CM/PCS coding occurred in third quarter of 2015. Estimates reported from years post-2015 were estimated using ICD-10 codes and may not be directly comparable to rates estimated pre-2015.

**Appendix 5. Table 5.** Rates of All-Cause Diabetes Inpatient Stays per 10,000 Adults in Maryland; Years 2008-2017

| Variable              | 2008            |             |                        | 2011            |             |                        |  | 2014            |             |                        | 2017            |             |                      | 2017-2008         |                  |                |
|-----------------------|-----------------|-------------|------------------------|-----------------|-------------|------------------------|--|-----------------|-------------|------------------------|-----------------|-------------|----------------------|-------------------|------------------|----------------|
|                       | # of I.P. Stays | Denominator | Rate (c.i.)            | # of I.P. Stays | Denominator | Rate (c.i.)            |  | # of I.P. Stays | Denominator | Rate (c.i.)            | # of I.P. Stays | Denominator | Rate (c.i.)          | Absolute $\Delta$ | Percent $\Delta$ | (c.i.)         |
| <b>Age</b>            |                 |             |                        |                 |             |                        |  |                 |             |                        |                 |             |                      |                   |                  |                |
| 18-29                 | 2,857           | 925,017     | 30.9 (29.8,32)         | 3,204           | 961,324     | 33.3 (32.2,34.5)       |  | 2,863           | 981,853     | 29.2 (28.1,30.2)       | 2,835           | 956,139     | 29.7 (28.6,30.7)     | -1.2              | -3.9             | (-8.4, 0.6)    |
| 30-44                 | 13,133          | 1,179,901   | 111.3 (109.4,113.2)    | 11,785          | 1,168,164   | 100.9 (99.1,102.7)     |  | 10,053          | 1,184,647   | 84.9 (83.2,86.5)       | 9,610           | 1,197,106   | 80.3 (78.7,81.9)     | -31               | -27.9            | (-29.8, -26)   |
| 45-64                 | 60,879          | 1,509,065   | 403.4 (400.2,406.6)    | 59,968          | 1,622,154   | 369.7 (366.7,372.6)    |  | 52,773          | 1,643,919   | 321 (318.3,323.8)      | 51,354          | 1,653,684   | 310.5 (307.9,313.2)  | -92.9             | -23.0            | (-23.9, -22.1) |
| 65-74                 | 35,147          | 336,994     | 1043 (1032.1,1053.9)   | 33,781          | 376,339     | 897.6 (888, 907.2)     |  | 33,445          | 445,619     | 750.5 (742.5,758.6)    | 34,913          | 488,375     | 714.9 (707.4,722.4)  | -328.1            | -31.5            | (-32.6, -30.4) |
| 75+                   | 52,167          | 347,770     | 1500 (1487.2,1512.9)   | 49,012          | 354,276     | 1383.4 (1371.2,1395.7) |  | 44,341          | 373,097     | 1188.5 (1177.4,1199.5) | 46,354          | 411,753     | 1125.8 (1115.5,1136) | -374.2            | -24.9            | (-25.8, -24)   |
| <b>Sex</b>            |                 |             |                        |                 |             |                        |  |                 |             |                        |                 |             |                      |                   |                  |                |
| Female                | 88,888          | 2,254,179   | 380.5 (378, 383.1)     | 84,262          | 2,347,748   | 342.5 (340.2,344.8)    |  | 74,946          | 2,421,400   | 287.9 (285.9,290.0)    | 73,542          | 2,457,969   | 269.2 (267.2,271.1)  | -111.3            | -29.3            | (-30, -28.6)   |
| Male                  | 75,295          | 2,044,568   | 406.1 (403.2,409)      | 73,488          | 2,134,509   | 371.4 (368.7,374.1)    |  | 68,529          | 2,207,735   | 324.1 (321.7,326.6)    | 71,524          | 2,249,088   | 318.1 (315.7,320.4)  | -88               | -21.7            | (-22.5, -20.9) |
| <b>Race/Ethnicity</b> |                 |             |                        |                 |             |                        |  |                 |             |                        |                 |             |                      |                   |                  |                |
| White, Non-Hispanic   | 92,944          | 2555841     | 328.7 (326.6,330.9)    | 85,555          | 2542349     | 293.9 (291.9,295.9)    |  | 74,817          | 2540532     | 249.1 (247.3,251.0)    | 76,349          | 2,504,317   | 248.1 (246.4,249.9)  | -80.6             | -24.5            | (-25.2, -23.8) |
| Black, Non-Hispanic   | 63,224          | 1199144     | 620.7 (615.8,625.6)    | 63,314          | 1269315     | 573.8 (569.2,578.3)    |  | 58,630          | 1325983     | 486.8 (482.6,490.9)    | 57,118          | 1,367,328   | 435.3 (431.7,438.9)  | -185.4            | -29.9            | (-30.7, -29.1) |
| Hispanic              | 2,389           | 248620      | 166.8 (159.5,174.1)    | 2,950           | 333408      | 168.9 (162.1,175.8)    |  | 4,054           | 377452      | 198.8 (191.0,206.5)    | 4,594           | 408,745     | 197.4 (190.9,204)    | 30.6              | 18.3             | (13.4, 23.2)   |
| <b>Rural/Urban</b>    |                 |             |                        |                 |             |                        |  |                 |             |                        |                 |             |                      |                   |                  |                |
| Rural                 | 12,849          | 256,663     | 495.4 (486.8,504)      | 12,093          | 264,105     | 426.7 (419.1,434.3)    |  | 5,785           | 286,834     | 178.2 (173.6,182.9)    | 5,710           | 291,832     | 167 (162.6,171.3)    | -328.4            | -66.3            | (-67.9, -64.7) |
| Urban                 | 151,334         | 4,042,084   | 384.1 (382.2,386.1)    | 145,657         | 4,218,152   | 349.6 (347.8,351.4)    |  | 137,690         | 4,342,301   | 312.7 (311.0,314.3)    | 139,356         | 4,415,225   | 299.4 (297.9,301)    | -84.7             | -22.1            | (-22.7, -21.5) |
| <b>Insurance</b>      |                 |             |                        |                 |             |                        |  |                 |             |                        |                 |             |                      |                   |                  |                |
| Medicaid              | 17,112          | 146,118     | 1171.1 (1153.6,1188.7) | 18,990          | 259,084     | 733 (722.5,743.4)      |  | 19,697          | 381,128     | 516.8 (509.6,524.0)    | 20,697          | 425,596     | 486.3 (479.7,492.9)  | -684.8            | -58.5            | (-59.9, -57.1) |
| Medicare              | 98,576          | 736,236     | 1338.9 (1330.6,1347.3) | 95,976          | 794,757     | 1207.6 (1200, 1215.3)  |  | 90,434          | 889,220     | 1017 (1010.4,1023.6)   | 92,567          | 967,979     | 956.3 (950.1,962.5)  | -382.6            | -28.6            | (-29.3, -27.9) |
| Private               | 40,505          | 2,781,283   | 145.6 (144.2,147.1)    | 34,424          | 2,790,686   | 123.4 (122.1,124.7)    |  | 29,221          | 2,819,513   | 103.6 (102.5,104.8)    | 27,778          | 2,879,302   | 96.5 (95.3,97.6)     | -49.1             | -33.7            | (-34.7, -32.7) |
| Uninsured             | 5,654           | 555,310     | 101.8 (99.2,104.5)     | 5,953           | 548,093     | 108.6 (105.9,111.4)    |  | 1,893           | 443,011     | 42.7 (40.8,44.7)       | 1,259           | 332,280     | 37.9 (35.8,40)       | -63.9             | -62.8            | (-65.7, -59.9) |
| Total                 | 164,183         | 4,298,747   | 391.1 (389.2,393)      | 157,750         | 4,482,257   | 354.6 (352.8,356.3)    |  | 143,475         | 4,629,135   | 303.5 (302.0,305.1)    | 145,066         | 4,707,057   | 290.5 (289, 292)     | -100.6            | -25.7            | (-26.2, -25.2) |

<sup>a</sup> Total # of Inpatient Stays N=610,474

<sup>b</sup> All rates except Age-Specific and Insurance-Specific rates are age-standardized to the 2010 US Adult Population using data from the CDC Mortality Database

<sup>c</sup> The transition from ICD-9 CM/PCS to ICD-10 CM/PCS coding occurred in third quarter of 2015. Estimates reported from years post-2015 were estimated using ICD-10 codes and may not be directly comparable to rates estimated pre-2015.

**Appendix 5. Table 6.** Rates of All-Cause Diabetes Inpatient Stays per 10,000 Adults in North Carolina; Years 2008-2017

| Variable                          | 2008            |             |        |                 | 2011            |             |        |                 | 2014            |             |        |                | 2017            |             |       |                | 2017-2008         |                  |                |
|-----------------------------------|-----------------|-------------|--------|-----------------|-----------------|-------------|--------|-----------------|-----------------|-------------|--------|----------------|-----------------|-------------|-------|----------------|-------------------|------------------|----------------|
|                                   | # of I.P. Stays | Denominator | Rate   | (c.i.)          | # of I.P. Stays | Denominator | Rate   | (c.i.)          | # of I.P. Stays | Denominator | Rate   | (c.i.)         | # of I.P. Stays | Denominator | Rate  | (c.i.)         | Absolute $\Delta$ | Percent $\Delta$ | (c.i.)         |
| <b>Age</b>                        |                 |             |        |                 |                 |             |        |                 |                 |             |        |                |                 |             |       |                |                   |                  |                |
| 18-29                             | 4,973           | 1,506,878   | 33.0   | (32.1,33.9)     | 5,652           | 1,579,505   | 35.8   | (34.9,36.7)     | 5,646           | 1,629,692   | 34.6   | (33.7,35.5)    | 6,196           | 1,675,318   | 37.0  | (36.1,37.9)    | 4                 | 12.1             | (8.7, 15.5)    |
| 30-44                             | 18,216          | 1,966,936   | 92.6   | (91.3,94.0)     | 19,112          | 1,956,756   | 97.7   | (96.3,99.1)     | 20,087          | 1,964,562   | 102.2  | (100.8,103.7)  | 19,913          | 1,964,144   | 101.4 | (100, 102.8)   | 8.8               | 9.5              | (7.7, 11.3)    |
| 45-64                             | 75,067          | 2,367,982   | 317.0  | (314.7,319.3)   | 84,280          | 2,553,324   | 330.1  | (327.9,332.3)   | 92,399          | 2,599,340   | 355.5  | (353.2,357.8)  | 90,389          | 2,704,704   | 334.2 | (332, 336.4)   | 17.2              | 5.4              | (4.6, 6.2)     |
| 65-74                             | 44,746          | 576,439     | 776.3  | (769.1,783.4)   | 51,085          | 671,783     | 760.4  | (753.8,767)     | 61,385          | 811,978     | 756.0  | (750, 762)     | 60,766          | 909,997     | 667.8 | (662.5,673.1)  | -108.5            | -14.0            | (-15, -13)     |
| 75+                               | 56,593          | 562,439     | 1006.2 | (997.9,1,014.5) | 64,048          | 604,764     | 1059.1 | (1050.9,1067.3) | 73,943          | 649,047     | 1139.3 | (1131, 1147.5) | 71,329          | 718,475     | 992.8 | (985.5,1000.1) | -13.4             | -1.3             | (-2.2, -0.4)   |
| <b>Sex</b>                        |                 |             |        |                 |                 |             |        |                 |                 |             |        |                |                 |             |       |                |                   |                  |                |
| Female                            | 108,849         | 3,621,428   | 289.3  | (287.5,291)     | 120,554         | 3,837,059   | 296.9  | (295.2,298.6)   | 133,323         | 3,986,470   | 306.7  | (305.1,308.4)  | 127,443         | 4,153,432   | 275.3 | (273.8,276.9)  | -14               | -4.8             | (-5.5, -4.1)   |
| Male                              | 90,746          | 3,359,246   | 299.9  | (297.9,301.8)   | 103,623         | 3,529,073   | 310.6  | (308.7,312.5)   | 120,137         | 3,668,149   | 333.7  | (331.8,335.6)  | 121,150         | 3,819,206   | 310.9 | (309.1,312.6)  | 11                | 3.7              | (3, 4.4)       |
| <b>Race/Ethnicity<sup>d</sup></b> |                 |             |        |                 |                 |             |        |                 |                 |             |        |                |                 |             |       |                |                   |                  |                |
| White, Non-Hispanic               | -               | -           | -      | -               | 144,178         | 5,012,355   | 257.1  | (255.8,258.4)   | 159,990         | 5,142,267   | 267.8  | (266.5,269.2)  | 153,052         | 5,276,746   | 242.8 | (241.5,244)    | -14.3             | -5.6             | (-6.2, -5)     |
| Black, Non-Hispanic               | -               | -           | -      | -               | 68,273          | 1,525,444   | 499.2  | (495.4,503)     | 77,601          | 1,599,624   | 524.4  | (520.6,528.1)  | 77,329          | 1,663,098   | 486.0 | (482.5,489.4)  | -13.2             | -2.6             | (-3.5, -1.7)   |
| Hispanic                          | -               | -           | -      | -               | 3,427           | 507,001     | 169.0  | (161.9,176.1)   | 5,976           | 543,612     | 241.6  | (234.2,248.9)  | 7,105           | 591,627     | 241.4 | (234.7,248)    | 72.4              | 42.8             | (38, 47.6)     |
| <b>Rural/Urban</b>                |                 |             |        |                 |                 |             |        |                 |                 |             |        |                |                 |             |       |                |                   |                  |                |
| Rural                             | 76,227          | 2,169,085   | 331.0  | (328.6,333.3)   | 83,445          | 2,265,395   | 334.4  | (332.1,336.7)   | 75,556          | 2,284,763   | 292.1  | (290, 294.2)   | 73,189          | 2,319,651   | 272.5 | (270.5,274.5)  | -58.5             | -17.7            | (-18.5, -16.9) |
| Urban                             | 123,368         | 4,811,589   | 274.8  | (273.2,276.3)   | 140,732         | 5,100,737   | 286.8  | (285.3,288.3)   | 177,904         | 5,369,856   | 331.0  | (329.5,332.6)  | 175,404         | 5,652,987   | 300.4 | (299, 301.8)   | 25.6              | 9.3              | (8.7, 9.9)     |
| <b>Insurance</b>                  |                 |             |        |                 |                 |             |        |                 |                 |             |        |                |                 |             |       |                |                   |                  |                |
| Medicaid                          | 19,589          | 313,186     | 625.5  | (616.7,634.3)   | 22,084          | 407,701     | 541.7  | (534.5,548.8)   | 24,608          | 440,204     | 559.0  | (552, 566)     | 25,038          | 487,943     | 513.1 | (506.8,519.5)  | -112.4            | -18.0            | (-19.5, -16.5) |
| Medicare                          | 116,763         | 1,352,260   | 863.5  | (858.5,868.4)   | 131,225         | 1,522,184   | 862.1  | (857.4,866.7)   | 136,469         | 1,709,304   | 798.4  | (794.2,802.6)  | 127,243         | 1,871,776   | 679.8 | (676.1,683.5)  | -183.7            | -21.3            | (-21.9, -20.7) |
| Private                           | 49,137          | 3,877,629   | 126.7  | (125.6,127.8)   | 54,529          | 3,785,857   | 144.0  | (142.8,145.2)   | 74,903          | 4,075,326   | 183.8  | (182.5,185.1)  | 77,048          | 4,344,322   | 177.4 | (176.1,178.6)  | 50.7              | 40.0             | (38.9, 41.1)   |
| Uninsured                         | 9,612           | 1,220,469   | 78.8   | (77.2,80.3)     | 11,282          | 1,398,146   | 80.7   | (79.2,82.2)     | 11,396          | 1,180,182   | 96.6   | (94.8,98.3)    | 12,271          | 998,211     | 122.9 | (120.8,125.1)  | 44.1              | 56.0             | (53.1, 58.9)   |
| Total                             | 199,595         | 6,980,674   | 293.0  | (291.7,294.3)   | 224,177         | 7,366,132   | 302.1  | (300.9,303.4)   | 253,460         | 7,654,619   | 317.8  | (316.6,319.1)  | 248,593         | 7,972,638   | 291.0 | (289.8,292.1)  | -2                | -0.7             | (-1.2, -0.2)   |

<sup>a</sup> Total # of Inpatient Stays N=925,825

<sup>u</sup> All rates except Age-Specific and Insurance-Specific rates are age-standardized to the 2010 US Adult Population using data from the CDC Mortality Database

<sup>c</sup> The transition from ICD-9 CM/PCS to ICD-10 CM/PCS coding occurred in third quarter of 2015. Estimates reported from years post-2015 were estimated using ICD-10 codes and may not be directly comparable to rates estimated pre-2015.

<sup>d</sup> Value of - indicates estimate was not reported. All estimates n<=10 events or RSE>=30% were not reported. Additionally, HCUP prioritizes ethnicity when coding the uniform Race variable, FL, IA, and NC did not provide an ethnicity variable in 2008. Percent change estimates for race/ethnicity subgroups in states FL, IA, and NC used 2011 as the reference year.

**Appendix 5. Table 7.** Rates of All-Cause Diabetes Inpatient Stays per 10,000 Adults in Nebraska: Years 2008-2017

| Variable                          | 2008            |                  |              |                      | 2011            |                  |              |                      | 2014            |                  |              |                     | 2017            |                  |              |                      | 2017-2008         |                  |                   |
|-----------------------------------|-----------------|------------------|--------------|----------------------|-----------------|------------------|--------------|----------------------|-----------------|------------------|--------------|---------------------|-----------------|------------------|--------------|----------------------|-------------------|------------------|-------------------|
|                                   | # of I.P. Stays | Denominator      | Rate         | (c.i.)               | # of I.P. Stays | Denominator      | Rate         | (c.i.)               | # of I.P. Stays | Denominator      | Rate         | (c.i.)              | # of I.P. Stays | Denominator      | Rate         | (c.i.)               | Absolute $\Delta$ | Percent $\Delta$ | (c.i.)            |
| <b>Age</b>                        |                 |                  |              |                      |                 |                  |              |                      |                 |                  |              |                     |                 |                  |              |                      |                   |                  |                   |
| 18-29                             | 664             | 306,221          | 21.7         | (20,23.3)            | 849             | 315,155          | 26.9         | (25.1,28.8)          | 714             | 310,033          | 23           | (21.3,24.7)         | 891             | 316,312          | 28.2         | (26.3,30)            | 6.5               | 30.0             | (20.8, 39.2)      |
| 30-44                             | 2,054           | 335,474          | 61.2         | (58.6,63.9)          | 2,152           | 337,329          | 63.8         | (61.1,66.5)          | 2,092           | 360,994          | 58           | (55.5,60.4)         | 2,593           | 364,731          | 71.1         | (68.4,73.8)          | 9.9               | 16.2             | (10.9, 21.5)      |
| 45-64                             | 10,155          | 449,350          | 226          | (221.6,230.4)        | 10,473          | 480,215          | 218.1        | (213.9,222.3)        | 9,015           | 470,520          | 191.6        | (187.6,195.6)       | 13,083          | 469,395          | 278.7        | (273.9,283.5)        | 52.7              | 23.3             | (20.9, 25.7)      |
| 65-74                             | 7,007           | 107,290          | 653.1        | (637.8,668.4)        | 6,499           | 114,778          | 566.2        | (552.5,580)          | 5,958           | 137,087          | 434.6        | (423.6,445.7)       | 10,417          | 153,222          | 679.9        | (666.8,692.9)        | 26.8              | 4.1              | (1.5, 6.7)        |
| 75+                               | 12,157          | 129,899          | 935.9        | (919.2,952.5)        | 10,836          | 135,971          | 796.9        | (781.9,811.9)        | 8,697           | 134,303          | 647.6        | (634, 661.2)        | 14,331          | 141,352          | 1014         | (997.3,1030.5)       | 78                | 8.3              | (6.2, 10.4)       |
| <b>Sex</b>                        |                 |                  |              |                      |                 |                  |              |                      |                 |                  |              |                     |                 |                  |              |                      |                   |                  |                   |
| Female                            | 16,702          | 680,017          | 222.7        | (219.3,226.2)        | 16,108          | 706,151          | 208.9        | (205.6,212.2)        | 13,481          | 717,025          | 170.9        | (167.9,173.8)       | 20,367          | 729,285          | 246.9        | (243.4,250.3)        | 24.2              | 10.9             | (9, 12.8)         |
| Male                              | 15,335          | 648,217          | 251.5        | (247.5,255.5)        | 14,701          | 677,297          | 222.2        | (218.6,225.8)        | 12,995          | 695,912          | 188.9        | (185.7,192.2)       | 20,948          | 715,727          | 287.4        | (283.5,291.3)        | 35.9              | 14.3             | (12.4, 16.2)      |
| <b>Race/Ethnicity<sup>d</sup></b> |                 |                  |              |                      |                 |                  |              |                      |                 |                  |              |                     |                 |                  |              |                      |                   |                  |                   |
| White, Non-Hispanic               | -               | -                | -            | -                    | -               | -                | -            | -                    | -               | -                | -            | -                   | -               | -                | -            | -                    | -                 | -                | -                 |
| Black, Non-Hispanic               | -               | -                | -            | -                    | -               | -                | -            | -                    | -               | -                | -            | -                   | -               | -                | -            | -                    | -                 | -                | -                 |
| Hispanic                          | -               | -                | -            | -                    | -               | -                | -            | -                    | -               | -                | -            | -                   | -               | -                | -            | -                    | -                 | -                | -                 |
| <b>Rural/Urban</b>                |                 |                  |              |                      |                 |                  |              |                      |                 |                  |              |                     |                 |                  |              |                      |                   |                  |                   |
| Rural                             | 15,592          | 569,030          | 227.8        | (224.1,231.5)        | 14,083          | 576,261          | 201.5        | (198.1,205)          | 10,821          | 576,096          | 156.9        | (153.9,159.9)       | 16,130          | 574,919          | 226.9        | (223.3,230.4)        | -0.9              | -0.4             | (-2.3, 1.5)       |
| Urban                             | 16,445          | 759,204          | 241.2        | (237.5,244.9)        | 16,726          | 807,187          | 224          | (220.6,227.4)        | 15,655          | 836,841          | 197.4        | (194.3,200.5)       | 25,185          | 870,093          | 295.4        | (291.7,299)          | 54.2              | 22.5             | (20.7, 24.3)      |
| <b>Insurance</b>                  |                 |                  |              |                      |                 |                  |              |                      |                 |                  |              |                     |                 |                  |              |                      |                   |                  |                   |
| Medicaid                          | 1,796           | 40,626           | 442.1        | (421.6,462.5)        | 1,863           | 47,356           | 393.4        | (375.5,411.3)        | 1,207           | 51,743           | 233.3        | (220.1,246.4)       | 3,133           | 54,807           | 571.6        | (551.6,591.7)        | 129.5             | 29.3             | (23.9, 34.7)      |
| Medicare                          | 21,390          | 262,843          | 813.8        | (802.9,824.7)        | 19,507          | 278,804          | 699.7        | (689.8,709.5)        | 16,764          | 299,763          | 559.2        | (550.8,567.7)       | 27,808          | 316,330          | 879.1        | (868.7,889.4)        | 65.3              | 8.0              | (6.4, 9.6)        |
| Private                           | 7,649           | 847,442          | 90.3         | (88.2,92.3)          | 8,045           | 837,009          | 96.1         | (94,98.2)            | 7,256           | 876,007          | 82.8         | (80.9,84.7)         | 8,977           | 906,023          | 99.1         | (97, 101.1)          | 8.8               | 9.7              | (7.1, 12.3)       |
| Uninsured                         | 672             | 153,935          | 43.7         | (40.4,47)            | 894             | 181,493          | 49.3         | (46,52.5)            | 752             | 150,163          | 50.1         | (46.5,53.7)         | 420             | 135,703          | 30.9         | (28,33.9)            | -12.8             | -29.3            | (-37.9, -20.7)    |
| <b>Total</b>                      | <b>32,037</b>   | <b>1,328,234</b> | <b>233.7</b> | <b>(231.1,236.3)</b> | <b>30,809</b>   | <b>1,383,448</b> | <b>213.8</b> | <b>(211.4,216.2)</b> | <b>26,476</b>   | <b>1,412,937</b> | <b>178.2</b> | <b>(176, 180.3)</b> | <b>41,315</b>   | <b>1,445,012</b> | <b>264.7</b> | <b>(262.1,267.2)</b> | <b>31</b>         | <b>13.3</b>      | <b>(12, 14.6)</b> |

<sup>a</sup> Total # of Inpatient Stays N=130,637

<sup>b</sup> All rates except Age-Specific and Insurance-Specific rates are age-standardized to the 2010 US Adult Population using data from the CDC Mortality Database

<sup>c</sup> The transition from ICD-9 CM/PCS to ICD-10 CM/PCS coding occurred in third quarter of 2015. Estimates reported from years post-2015 were estimated using ICD-10 codes and may not be directly comparable to rates estimated pre-2015.

<sup>d</sup> Value of - indicates estimate was not reported. All estimates n<=10 events or RSE>=30% were not reported. Nebraska did not provide a race variable to HCUP.

**Appendix 5. Table 8.** Rates of All-Cause Diabetes Inpatient Stays per 10,000 Adults in New Jersey; Years 2008-2017

|                          | 2008            |             |        |                 | 2011            |             |        |                 | 2014            |             |        |                 | 2017            |             |        |                 | 2017-2008  |           |                |
|--------------------------|-----------------|-------------|--------|-----------------|-----------------|-------------|--------|-----------------|-----------------|-------------|--------|-----------------|-----------------|-------------|--------|-----------------|------------|-----------|----------------|
| Variable                 | # of I.P. Stays | Denominator | Rate   | (c.i.)          | # of I.P. Stays | Denominator | Rate   | (c.i.)          | # of I.P. Stays | Denominator | Rate   | (c.i.)          | # of I.P. Stays | Denominator | Rate   | (c.i.)          | Absolute Δ | Percent Δ | (c.i.)         |
| Age                      |                 |             |        |                 |                 |             |        |                 |                 |             |        |                 |                 |             |        |                 |            |           |                |
| 18-29                    | 2,922           | 1,306,349   | 22.4   | (21.6,23.2)     | 3,244           | 1,324,379   | 24.5   | (23.7,25.3)     | 3,281           | 1,367,695   | 24     | (23.2,24.8)     | 3,376           | 1,372,927   | 24.6   | (23.8,25.4)     | 2.2        | 9.9       | (5.6, 14.2)    |
| 30-44                    | 14,452          | 1,862,521   | 77.6   | (76.3,78.9)     | 13,481          | 1,783,584   | 75.6   | (74.3,76.9)     | 12,524          | 1,753,846   | 71.4   | (70.2,72.7)     | 12,218          | 1,749,689   | 69.8   | (68.6,71.1)     | -7.8       | -10.0     | (-11.9, -8.1)  |
| 45-64                    | 71,755          | 2,322,663   | 308.9  | (306.7,311.2)   | 70,528          | 2,461,341   | 286.5  | (284.4,288.7)   | 68,681          | 2,494,736   | 275.3  | (273.2,277.4)   | 68,814          | 2,490,992   | 276.2  | (274.2,278.3)   | -32.7      | -10.6     | (-11.4, -9.8)  |
| 65-74                    | 46,738          | 539,915     | 865.6  | (857.8,873.5)   | 45,512          | 589,674     | 771.8  | (764.7,778.9)   | 47,345          | 676,027     | 700.3  | (694.0,706.7)   | 49,418          | 739,520     | 668.2  | (662.4,674.1)   | -197.4     | -22.8     | (-23.8, -21.8) |
| 75+                      | 84,963          | 604,153     | 1406.3 | (1396.9,1415.8) | 81,378          | 621,296     | 1309.8 | (1300.8,1318.8) | 77,240          | 634,566     | 1217.2 | (1208.6,1225.8) | 80,032          | 675,978     | 1183.9 | (1175.7,1192.2) | -222       | -15.8     | (-16.5, -15.1) |
| Sex                      |                 |             |        |                 |                 |             |        |                 |                 |             |        |                 |                 |             |        |                 |            |           |                |
| Female                   | 113,372         | 3,426,778   | 296.4  | (294.7,298.2)   | 108,367         | 3,527,273   | 271.1  | (269.5,272.8)   | 103,134         | 3,591,661   | 249.1  | (247.5,250.6)   | 103,522         | 3,641,398   | 240.9  | (239.4,242.4)   | -55.5      | -18.7     | (-19.4, -18)   |
| Male                     | 107,458         | 3,208,823   | 359.6  | (357.5,361.8)   | 105,776         | 3,253,001   | 336.8  | (334.7,338.8)   | 105,937         | 3,335,209   | 321    | (319.0,322.9)   | 110,336         | 3,387,708   | 317.3  | (315.4,319.1)   | -42.4      | -11.8     | (-12.5, -11.1) |
| Race/Ethnicity           |                 |             |        |                 |                 |             |        |                 |                 |             |        |                 |                 |             |        |                 |            |           |                |
| White, Non-Hispanic      | 44,932          | 838203      | 630.7  | (624.8,636.6)   | 44,453          | 840695      | 582.9  | (577.5,588.4)   | 44,711          | 869873      | 553.3  | (548.2,558.5)   | 45,278          | 886,765     | 534.5  | (529.6,539.5)   | -96.1      | -15.2     | (-16.2, -14.2) |
| Black, Non-Hispanic      | 23,793          | 996973      | 366.7  | (361.8,371.6)   | 24,462          | 1128479     | 332    | (327.7,336.4)   | 24,631          | 1225135     | 283.1  | (279.4,286.8)   | 27,570          | 1,307,725   | 279.2  | (275.8,282.6)   | -87.5      | -23.9     | (-25.3, -22.5) |
| Hispanic                 | 136,413         | 4229385     | 268.2  | (266.8,269.7)   | 130,784         | 4131094     | 253.6  | (252.2,255)     | 124,550         | 4087664     | 239    | (237.6,240.3)   | 123,470         | 4,025,066   | 233    | (231.7,234.4)   | -35.2      | -13.1     | (-13.7, -12.5) |
| Rural/Urban <sup>d</sup> |                 |             |        |                 |                 |             |        |                 |                 |             |        |                 |                 |             |        |                 |            |           |                |
| Rural                    | -               | -           | -      | -               | -               | -           | -      | -               | -               | -           | -      | -               | -               | -           | -      | -               | -          | -         | -              |
| Urban                    | -               | -           | -      | -               | -               | -           | -      | -               | -               | -           | -      | -               | -               | -           | -      | -               | -          | -         | -              |
| Insurance                |                 |             |        |                 |                 |             |        |                 |                 |             |        |                 |                 |             |        |                 |            |           |                |
| Medicaid                 | 11,041          | 290,635     | 379.9  | (372.8,387.0)   | 13,553          | 361,594     | 374.8  | (368.5,381.1)   | 18,376          | 462,056     | 397.7  | (392.0,403.5)   | 22,334          | 584,094     | 382.4  | (377.4,387.4)   | 2.5        | 0.7       | (-1.2, 2.6)    |
| Medicare                 | 139,342         | 1,250,959   | 1113.9 | (1108.0,1119.7) | 135,291         | 1,311,515   | 1031.6 | (1026.1,1037.1) | 131,305         | 1,415,311   | 927.8  | (922.7,932.8)   | 133,184         | 1,522,964   | 874.5  | (869.8,879.2)   | -239.4     | -21.5     | (-22.1, -20.9) |
| Private                  | 54,733          | 4,139,238   | 132.2  | (131.1,133.3)   | 49,412          | 4,009,016   | 123.3  | (122.2,124.3)   | 48,230          | 4,102,112   | 117.6  | (116.5,118.6)   | 48,886          | 4,249,595   | 115    | (114.0,116.1)   | -17.2      | -13.0     | (-14, -12)     |
| Uninsured                | 13,703          | 923,607     | 148.4  | (145.9,150.9)   | 14,015          | 1,060,003   | 132.2  | (130, 134.4)    | 8,713           | 910,641     | 95.7   | (93.7,97.7)     | 3,366           | 629,971     | 53.4   | (51.6,55.2)     | -94.9      | -64.0     | (-65.7, -62.3) |
| Total                    | 220,830         | 6,635,601   | 323.8  | (322.5,325.2)   | 214,143         | 6,780,274   | 299.7  | (298.4,300.9)   | 209,071         | 6,926,870   | 280.6  | (279.4,281.8)   | 213,858         | 7,029,106   | 275.1  | (273.9,276.3)   | -48.8      | -15.1     | (-15.6, -14.6) |

<sup>a</sup> Total # of Inpatient Stays N=857,902

<sup>b</sup> All rates except Age-Specific and Insurance-Specific rates are age-standardized to the 2010 US Adult Population using data from the CDC Mortality Database

<sup>c</sup> The transition from ICD-9 CM/PCS to ICD-10 CM/PCS coding occurred in third quarter of 2015. Estimates reported from years post-2015 were estimated using ICD-10 codes and may not be directly comparable to rates estimated pre-2015.

<sup>d</sup> Value of - indicates estimate was not reported. All estimates n<=10 events or RSE>=30% were not reported. Denominator estimates for rural population in New Jersey using the American Community Survey USDA-linked rural/urban variable were <10.



**Appendix 5. Table 9.** Rates of All-Cause Diabetes Inpatient Stays per 10,000 Adults in New York; Years 2008-2016

| Variable              | 2008            |                   |                            | 2011            |                   |                          |  | 2014            |                   |                            |  | 2017            |                   |                            | 2017-2008         |                  |                   |
|-----------------------|-----------------|-------------------|----------------------------|-----------------|-------------------|--------------------------|--|-----------------|-------------------|----------------------------|--|-----------------|-------------------|----------------------------|-------------------|------------------|-------------------|
|                       | # of I.P. Stays | Denominator       | Rate (c.i.)                | # of I.P. Stays | Denominator       | Rate (c.i.)              |  | # of I.P. Stays | Denominator       | Rate (c.i.)                |  | # of I.P. Stays | Denominator       | Rate (c.i.)                | Absolute $\Delta$ | Percent $\Delta$ | (c.i.)            |
| <b>Age</b>            |                 |                   |                            |                 |                   |                          |  |                 |                   |                            |  |                 |                   |                            |                   |                  |                   |
| 18-29                 | 8,121           | 3,330,436         | 24.4 (23.9,24.9)           | 8,473           | 3,382,395         | 25 (24.5,25.6)           |  | 8,783           | 3,449,034         | 25.5 (24.9,26)             |  | 8,703           | 3,406,325         | 25.6 (25.0,26.1)           | 1.2               | 4.8              | (2.2, 7.4)        |
| 30-44                 | 34,859          | 4,020,959         | 86.7 (85.8,87.6)           | 33,785          | 3,890,674         | 86.8 (85.9,87.8)         |  | 30,706          | 3,898,392         | 78.8 (77.9,79.7)           |  | 30,024          | 3,861,706         | 77.8 (76.9,78.6)           | -8.9              | -10.3            | (-11.5, -9.1)     |
| 45-64                 | 170,099         | 5,141,374         | 330.8 (329.3,332.4)        | 181,321         | 5,253,266         | 345.2 (343.6,346.8)      |  | 172,172         | 5,283,866         | 325.8 (324.3,327.4)        |  | 174,405         | 5,273,615         | 330.7 (329.2,332.3)        | -0.1              | 0.0              | (-0.6, 0.6)       |
| 65-74                 | 102,688         | 1,224,393         | 838.7 (833.6,843.8)        | 107,227         | 1,290,368         | 831 (826.0,836.0)        |  | 109,277         | 1,486,157         | 735.3 (730.9,739.7)        |  | 114,951         | 1,586,994         | 724.3 (720.1,728.5)        | -114.3            | -13.6            | (-14.3, -12.9)    |
| 75+                   | 170,926         | 1,376,299         | 1241.9 (1236.0,1247.8)     | 175,238         | 1,372,131         | 1277.1 (1271.1,1283.1)   |  | 163,873         | 1,410,167         | 1162.1 (1156.5,1167.7)     |  | 169,559         | 1,443,619         | 1174.5 (1169.0,1180.1)     | -67.4             | -5.4             | (-5.9, -4.9)      |
| <b>Sex</b>            |                 |                   |                            |                 |                   |                          |  |                 |                   |                            |  |                 |                   |                            |                   |                  |                   |
| Female                | 253,881         | 7,874,358         | 296.4 (295.2,297.5)        | 259,634         | 7,950,682         | 298.5 (297.4,299.7)      |  | 243,277         | 8,106,141         | 271 (269.9,272.1)          |  | 245,491         | 8,119,687         | 268.4 (267.3,269.5)        | -28               | -9.4             | (-9.9, -8.9)      |
| Male                  | 232,812         | 7,219,103         | 347.2 (345.8,348.6)        | 246,410         | 7,238,152         | 360.8 (359.4,362.3)      |  | 241,534         | 7,421,475         | 334.3 (332.9,335.6)        |  | 252,151         | 7,452,572         | 340.6 (339.3,342.0)        | -6.6              | -1.9             | (-2.4, -1.4)      |
| <b>Race/Ethnicity</b> |                 |                   |                            |                 |                   |                          |  |                 |                   |                            |  |                 |                   |                            |                   |                  |                   |
| White, Non-Hispanic   | 263,994         | 9355249           | 244 (243.0,244.9)          | 266,210         | 9098525           | 249 (248.0,300.0)        |  | 245,195         | 9068059           | 225.9 (225.0,226.8)        |  | 244,381         | 8,958,153         | 223.8 (223.0, 224.7)       | -20.1             | -8.3             | (-8.7, -7.9)      |
| Black, Non-Hispanic   | 105,134         | 2129649           | 559 (555.6,562.4)          | 109,165         | 2136385           | 556.9 (553.6,560.3)      |  | 106,627         | 2194101           | 513.5 (510.4,516.6)        |  | 106,429         | 2,203,763         | 499.4 (496.4,502.4)        | -59.7             | -10.7            | (-11.4, -10)      |
| Hispanic              | 64,965          | 2308197           | 390.1 (387.0,393.2)        | 67,228          | 2514280           | 371.1 (368.2,373.9)      |  | 64,456          | 2661023           | 316.4 (313.9,318.9)        |  | 67,766          | 2,723,870         | 312 (309.6,314.3)          | -78.1             | -20.0            | (-20.8, -19.2)    |
| <b>Rural/Urban</b>    |                 |                   |                            |                 |                   |                          |  |                 |                   |                            |  |                 |                   |                            |                   |                  |                   |
| Rural                 | 39,814          | 1,243,723         | 300.5 (297.5,303.5)        | 40,168          | 1,250,394         | 288.4 (285.5,291.2)      |  | 34,729          | 1,235,524         | 245.7 (243.1,248.3)        |  | 36,050          | 1,214,296         | 254.8 (252.1,257.4)        | -45.8             | -15.2            | (-16.3, -14.1)    |
| Urban                 | 446,879         | 13,849,738        | 320.5 (319.5,321.4)        | 465,876         | 13,938,440        | 329.8 (328.8,330.7)      |  | 450,082         | 14,292,092        | 304.5 (303.6,305.4)        |  | 461,592         | 14,357,963        | 305.1 (304.3,306.0)        | -15.3             | -4.8             | (-5.1, -4.5)      |
| <b>Insurance</b>      |                 |                   |                            |                 |                   |                          |  |                 |                   |                            |  |                 |                   |                            |                   |                  |                   |
| Medicaid              | 81,889          | 1,351,364         | 606 (601.8,610.1)          | 90,550          | 1,760,708         | 514.3 (510.9,517.6)      |  | 93,675          | 2,043,074         | 458.5 (455.6,461.4)        |  | 98,344          | 2,318,372         | 424.2 (421.5,426.9)        | -181.8            | -30.0            | (-30.7, -29.3)    |
| Medicare              | 290,822         | 2,887,945         | 1007 (1003.4,1010.7)       | 305,494         | 2,963,084         | 1031 (1027.3,1034.7)     |  | 295,293         | 3,221,167         | 916.7 (913.4,920.0)        |  | 301,765         | 3,348,570         | 901.2 (898.0,904.4)        | -105.8            | -10.5            | (-10.9, -10.1)    |
| Private               | 90,069          | 8,727,751         | 103.2 (102.5,103.9)        | 89,519          | 8,288,813         | 108 (107.3,108.7)        |  | 78,094          | 8,581,836         | 91 (90.4,91.6)             |  | 80,125          | 8,688,671         | 92.2 (91.6,92.9)           | -11               | -10.6            | (-11.4, -9.8)     |
| Uninsured             | 16,706          | 2,019,786         | 82.7 (81.5,84.0)           | 11,877          | 2,061,120         | 57.6 (56.6,58.7)         |  | 9,276           | 1,569,929         | 59.1 (57.9,60.3)           |  | 9,044           | 1,104,604         | 81.9 (80.2,83.6)           | -0.8              | -1.0             | (-3.1, 1.1)       |
| <b>Total</b>          | <b>486,693</b>  | <b>15,093,461</b> | <b>318.8 (317.9,319.7)</b> | <b>506,044</b>  | <b>15,188,834</b> | <b>326 (325.1,326.9)</b> |  | <b>484,811</b>  | <b>15,527,616</b> | <b>299.3 (298.5,300.2)</b> |  | <b>497,642</b>  | <b>15,572,259</b> | <b>300.7 (299.9,301.6)</b> | <b>-18</b>        | <b>-5.7</b>      | <b>(-6, -5.4)</b> |

<sup>a</sup> Total # of Inpatient Stays N=1,975,190

<sup>b</sup> All rates except Age-Specific and Insurance-Specific rates are age-standardized to the 2010 US Adult Population using data from the CDC Mortality Database

<sup>c</sup> The transition from ICD-9 CM/PCS to ICD-10 CM/PCS coding occurred in third quarter of 2015. Estimates reported from years post-2015 were estimated using ICD-10 codes and may not be directly comparable to rates estimated pre-2015.

**Appendix 5. Table 10.** Rates of All-Cause Diabetes Inpatient Stays per 10,000 Adults in Utah; Years 2008-2016

| Variable              | 2008            |             |       |               | 2011            |             |       |               | 2014            |             |       |               | 2017            |             |             |               | 2017-2008         |                  |                |
|-----------------------|-----------------|-------------|-------|---------------|-----------------|-------------|-------|---------------|-----------------|-------------|-------|---------------|-----------------|-------------|-------------|---------------|-------------------|------------------|----------------|
|                       | # of I.P. Stays | Denominator | Rate  | (c.i.)        | # of I.P. Stays | Denominator | Rate  | (c.i.)        | # of I.P. Stays | Denominator | Rate  | (c.i.)        | # of I.P. Stays | Denominator | Rate (c.i.) |               | Absolute $\Delta$ | Percent $\Delta$ | (c.i.)         |
| <b>Age</b>            |                 |             |       |               |                 |             |       |               |                 |             |       |               |                 |             |             |               |                   |                  |                |
| 18-29                 | 992             | 590,462     | 16.8  | (15.8,17.9)   | 1,139           | 545,856     | 20.9  | (19.7,22.1)   | 1,162           | 547,583     | 21.2  | (20,22.4)     | 1,420           | 586,594     | 24.2        | (23.0,25.5)   | 7.4               | 44.1             | (35.9, 52.3)   |
| 30-44                 | 2,229           | 516,453     | 43.2  | (41.4,45.0)   | 2,605           | 567,614     | 45.9  | (44.1,47.7)   | 2,962           | 610,255     | 48.5  | (46.8,50.3)   | 3,725           | 640,622     | 58.1        | (56.3,60.0)   | 15                | 34.7             | (29.7, 39.7)   |
| 45-64                 | 9,363           | 538,738     | 173.8 | (170.3,177.3) | 9,943           | 563,825     | 176.3 | (172.9,179.8) | 10,468          | 585,497     | 178.8 | (175.4,182.2) | 13,350          | 614,875     | 217.1       | (213.4,220.8) | 43.3              | 24.9             | (22.4, 27.4)   |
| 65-74                 | 5,762           | 121,334     | 474.9 | (462.6,487.2) | 6,252           | 130,992     | 477.3 | (465.5,489.1) | 7,257           | 159,439     | 455.2 | (444.7,465.6) | 9,527           | 184,712     | 515.8       | (505.4,526.1) | 40.9              | 8.6              | (5.8, 11.4)    |
| 75+                   | 7,507           | 124,037     | 605.2 | (591.5,618.9) | 8,117           | 127,571     | 636.3 | (622.4,650.1) | 8,581           | 134,979     | 635.7 | (622.3,649.2) | 11,920          | 150,203     | 793.6       | (779.4,807.8) | 188.4             | 31.1             | (28.4, 33.8)   |
| <b>Sex</b>            |                 |             |       |               |                 |             |       |               |                 |             |       |               |                 |             |             |               |                   |                  |                |
| Female                | 12,720          | 952,000     | 153.3 | (150.6,156.0) | 13,858          | 971,560     | 160.8 | (158.2,163.6) | 14,633          | 1,024,043   | 156.8 | (154.3,159.4) | 19,096          | 1,092,186   | 188.5       | (185.8,191.2) | 35.2              | 23.0             | (20.9, 25.1)   |
| Male                  | 13,133          | 939,024     | 183.6 | (180.5,186.8) | 14,198          | 964,298     | 186   | (182.9,189.1) | 15,797          | 1,013,710   | 189.2 | (186.2,192.1) | 20,846          | 1,084,820   | 226.8       | (223.7,229.9) | 43.2              | 23.5             | (21.5, 25.5)   |
| <b>Race/Ethnicity</b> |                 |             |       |               |                 |             |       |               |                 |             |       |               |                 |             |             |               |                   |                  |                |
| White, Non-Hispanic   | 22,345          | 1588818     | 163.1 | (161.0,165.3) | 23,225          | 1592695     | 162.2 | (160.1,164.3) | 20,774          | 1657244     | 134.9 | (132.9,136.9) | 33,644          | 1,745,144   | 201.9       | (199.7,204.1) | 38.8              | 23.8             | (22.2, 25.4)   |
| Black, Non-Hispanic   | 277             | 16936       | 215.6 | (186.9,244.3) | 320             | 15819       | 387.6 | (328.6,446.6) | 460             | 20701       | 333.7 | (294.7,372.7) | 650             | 24,066      | 381.2       | (345.9,416.5) | 165.5             | 76.8             | (59, 94.6)     |
| Hispanic              | 2,049           | 193733      | 195.4 | (185.8,204.9) | 2,997           | 224168      | 283.8 | (272.2,295.4) | 7,488           | 242961      | 655.4 | (636.3,674.6) | 2,891           | 273,160     | 172.7       | (165.7,179.8) | -22.6             | -11.6            | (-16.7, -6.5)  |
| <b>Rural/Urban</b>    |                 |             |       |               |                 |             |       |               |                 |             |       |               |                 |             |             |               |                   |                  |                |
| Rural                 | 4,152           | 313,916     | 138.6 | (134.3,142.8) | 4,458           | 322,547     | 134.4 | (130.5,138.4) | 4,474           | 272,165     | 168.6 | (163.6,173.5) | 5,492           | 289,750     | 190.7       | (185.6,195.8) | 52.2              | 37.6             | (33.6, 41.6)   |
| Urban                 | 21,701          | 1,577,108   | 176.1 | (173.7,178.4) | 23,598          | 1,613,311   | 183.5 | (181.2,185.9) | 25,956          | 1,765,588   | 172.4 | (170.3,174.5) | 34,450          | 1,887,256   | 209.3       | (207.1,211.5) | 33.2              | 18.9             | (17.3, 20.5)   |
| <b>Insurance</b>      |                 |             |       |               |                 |             |       |               |                 |             |       |               |                 |             |             |               |                   |                  |                |
| Medicaid              | 1,875           | 61,304      | 305.8 | (291.9,319.6) | 2,231           | 79,256      | 281.5 | (269.8,293.2) | 2,433           | 68,354      | 355.9 | (341.8,370.1) | 3,322           | 78,870      | 421.2       | (406.8,435.6) | 115.4             | 37.7             | (32.2, 43.2)   |
| Medicare              | 11,882          | 272,464     | 436.1 | (428.3,443.9) | 14,777          | 286,559     | 515.7 | (507.4,524)   | 17,380          | 329,176     | 528   | (520.1,535.8) | 24,049          | 362,242     | 663.9       | (655.5,672.3) | 227.8             | 52.2             | (50, 54.4)     |
| Private               | 9,506           | 1,233,040   | 77.1  | (75.5,78.6)   | 7,861           | 1,213,744   | 64.8  | (63.4,66.2)   | 7,666           | 1,323,294   | 57.9  | (56.6,59.2)   | 10,045          | 1,480,402   | 67.8        | (66.5,69.2)   | -9.2              | -12.0            | (-14.2, -9.8)  |
| Uninsured             | 843             | 296,240     | 28.4  | (26.5,30.4)   | 1,193           | 331,214     | 36    | (34.0,38.1)   | 1,211           | 285,740     | 42.4  | (40.0,44.8)   | 1,534           | 223,794     | 68.5        | (65.1,72.0)   | 40.1              | 141.0            | (129.4, 152.6) |
| Total                 | 25,853          | 1,891,024   | 167.2 | (165.1,169.2) | 28,056          | 1,935,858   | 172.3 | (170.3,174.4) | 30,430          | 2,037,753   | 171.8 | (169.9,173.8) | 39,942          | 2,177,006   | 206.4       | (204.4,208.5) | 39.3              | 23.5             | (22, 25)       |

<sup>a</sup> Total # of Inpatient Stays N=124,281

<sup>b</sup> All rates except Age-Specific and Insurance-Specific rates are age-standardized to the 2010 US Adult Population using data from the CDC Mortality Database

<sup>c</sup> The transition from ICD-9 CM/PCS to ICD-10 CM/PCS coding occurred in third quarter of 2015. Estimates reported from years post-2015 were estimated using ICD-10 codes and may not be directly comparable to rates estimated pre-2015.

**Appendix 5. Table 11.** Rates of All-Cause Diabetes Inpatient Stays per 10,000 Adults in Vermont; Years 2008-2017

| Variable                          | 2008            |             |                     | 2011            |             |                      |   | 2014            |             |                     |   | 2017            |             |                     | 2017-2008         |                  |                |
|-----------------------------------|-----------------|-------------|---------------------|-----------------|-------------|----------------------|---|-----------------|-------------|---------------------|---|-----------------|-------------|---------------------|-------------------|------------------|----------------|
|                                   | # of I.P. Stays | Denominator | Rate (c.i.)         | # of I.P. Stays | Denominator | Rate (c.i.)          |   | # of I.P. Stays | Denominator | Rate (c.i.)         |   | # of I.P. Stays | Denominator | Rate (c.i.)         | Absolute $\Delta$ | Percent $\Delta$ | (c.i.)         |
| <b>Age</b>                        |                 |             |                     |                 |             |                      |   |                 |             |                     |   |                 |             |                     |                   |                  |                |
| 18-29                             | 188             | 99,268      | 18.9 (16.2,21.7)    | 208             | 99,277      | 21 (18.1,23.8)       |   | 167             | 101,792     | 16.4 (13.9,18.9)    |   | 162             | 102,030     | 15.9 (13.4,18.3)    | -3.1              | -16.2            | (-32.4, 0)     |
| 30-44                             | 587             | 115,418     | 50.9 (46.7,55.0)    | 555             | 112,475     | 49.3 (45.2,53.5)     |   | 488             | 110,046     | 44.4 (40.4,48.3)    |   | 470             | 106,355     | 44.2 (40.2,48.2)    | -7                | -13.1            | (-22.6, -3.6)  |
| 45-64                             | 2,977           | 191,266     | 155.7 (150.1,161.2) | 3,079           | 193,415     | 159.2 (153.6,164.8)  |   | 3,021           | 186,455     | 162 (156.3,167.8)   |   | 3,026           | 182,085     | 166.2 (160.3,172.1) | 10.5              | 6.8              | (2.4, 11.2)    |
| 65-74                             | 2256            | 44,410      | 508 (487.0,529.0)   | 2225            | 47,543      | 468 (448.6,487.4)    |   | 2315            | 58,175      | 397.9 (381.7,414.2) |   | 2,547           | 63,713      | 399.8 (384.2,415.3) | -108.2            | -21.3            | (-25.6, -17)   |
| 75+                               | 3,553           | 42,854      | 829.1 (801.8,856.4) | 3,672           | 46,933      | 782.4 (757.10,807.7) |   | 3,698           | 48,020      | 770.1 (745.3,794.9) |   | 3,696           | 50,412      | 733.2 (709.5,756.8) | -95.9             | -11.6            | (-15.3, -7.9)  |
| <b>Sex</b>                        |                 |             |                     |                 |             |                      |   |                 |             |                     |   |                 |             |                     |                   |                  |                |
| Female                            | 4,715           | 254,338     | 167.9 (163.1,172.8) | 4,816           | 254,641     | 165 (160.3,169.7)    |   | 4,698           | 260,641     | 153.4 (148.9,157.8) |   | 4,730           | 259,493     | 150.6 (146.3,155)   | -17.3             | -10.3            | (-13.6, -7)    |
| Male                              | 4,846           | 238,878     | 206.3 (200.5,212.2) | 4,923           | 245,002     | 194.1 (188.7,199.5)  |   | 4,991           | 243,847     | 187.8 (182.5,193.0) |   | 5,171           | 245,102     | 187.3 (182.2,192.5) | -19               | -9.2             | (-12.4, -6)    |
| <b>Race/Ethnicity<sup>d</sup></b> |                 |             |                     |                 |             |                      |   |                 |             |                     |   |                 |             |                     |                   |                  |                |
| White, Non-Hispanic               | -               | -           | -                   | -               | -           | -                    | - | -               | -           | -                   | - | -               | -           | -                   | -                 | -                | -              |
| Black, Non-Hispanic               | -               | -           | -                   | -               | -           | -                    | - | -               | -           | -                   | - | -               | -           | -                   | -                 | -                | -              |
| Hispanic                          | -               | -           | -                   | -               | -           | -                    | - | -               | -           | -                   | - | -               | -           | -                   | -                 | -                | -              |
| <b>Rural/Urban</b>                |                 |             |                     |                 |             |                      |   |                 |             |                     |   |                 |             |                     |                   |                  |                |
| Rural                             | 6,724           | 331,730     | 183.4 (179.0,187.8) | 6,801           | 329,683     | 176.3 (172.1,180.6)  |   | 6,463           | 330,868     | 161.9 (157.9,165.9) |   | 6504            | 330,050     | 159.5 (155.5,163.4) | -23.9             | -13.0            | (-15.7, -10.3) |
| Urban                             | 2,837           | 161,486     | 188.7 (181.7,195.7) | 2,938           | 169,960     | 186.8 (180.0,193.6)  |   | 3,226           | 173,620     | 189.7 (183.2,196.3) |   | 3,397           | 174,545     | 189.5 (183.1,195.9) | 0.8               | 0.4              | (-3.8, 4.6)    |
| <b>Insurance</b>                  |                 |             |                     |                 |             |                      |   |                 |             |                     |   |                 |             |                     |                   |                  |                |
| Medicaid                          | 920             | 45,815      | 200.8 (187.9,213.8) | 999             | 56,954      | 175.3 (164.4,186.3)  |   | 956             | 65,776      | 145.4 (136.1,154.6) |   | 967             | 69,271      | 139.7 (130.8,148.5) | -61.2             | -30.5            | (-37.1, -23.9) |
| Medicare                          | 6,555           | 102,640     | 638.7 (623.2,654.1) | 6,637           | 106,997     | 620.3 (605.3,635.3)  |   | 6,656           | 124,297     | 535.5 (522.6,548.4) |   | 6,717           | 128,549     | 522.6 (510.0,535.1) | -116.1            | -18.2            | (-20.8, -15.6) |
| Private                           | 1,815           | 291,962     | 62.2 (59.3,65.0)    | 1,880           | 286,474     | 65.6 (62.6,68.7)     |   | 1,909           | 281,172     | 67.9 (64.8,71.0)    |   | 2,066           | 280,782     | 73.6 (70.3,76.8)    | 11.4              | 18.3             | (12.5, 24.1)   |
| Uninsured                         | 173.2           | 47,088      | 36.8 (31.3,42.3)    | 137.6           | 42,758      | 32.2 (26.8,37.6)     |   | 62.4            | 28,058      | 22.2 (16.7,27.8)    |   | 52              | 20,787      | 25 (18.1,31.9)      | -11.8             | -32.0            | (-52.2, -11.8) |
| Total                             | 9,561           | 493,216     | 184.1 (180.4,187.8) | 9,739           | 499,643     | 178 (174.4,181.5)    |   | 9,689           | 504,488     | 169.2 (165.8,172.6) |   | 9,901           | 504,595     | 167.7 (164.4,171.1) | -16.3             | -8.9             | (-11.2, -6.6)  |

<sup>a</sup> Total # of Inpatient Stays N=38,890

<sup>b</sup> All rates except Age-Specific and Insurance-Specific rates are age-standardized to the 2010 US Adult Population using data from the CDC Mortality Database

<sup>c</sup> The transition from ICD-9 CM/PCS to ICD-10 CM/PCS coding occurred in third quarter of 2015. Estimates reported from years post-2015 were estimated using ICD-10 codes and may not be directly comparable to rates estimated pre-2015.

<sup>d</sup> Value of - indicates estimate was not reported. All estimates n<=10 events or RSE>=30% were not reported. Race-specific estimates generated using Vermont data had relative standard errors >=30% for Black and Hispanic populations. As such, race/ethnicity specific estimates were not reported.

**Appendix 5. Table 12.** Average Rates of All-Cause Inpatient Stays from Pooled State Data by Race, Rural/Urban, and Insurance; Years 2008-2017

|                     | 2008                | 2011                   | 2014                | 2016 / 2017*        |
|---------------------|---------------------|------------------------|---------------------|---------------------|
|                     | Rate (95% CI)       | Rate (95% CI)          | Rate (95% CI)       | Rate (95% CI)       |
| Race                |                     |                        |                     |                     |
| Black, non-Hispanic | 587.4 (585, 589.9)  | 566.4 (564.7,568.2)    | 533.7 (532.1,535.4) | 518.8 (517.3,520.4) |
| Hispanic            | 363.2 (360.8,365.6) | 331.1 (329.6,332.6)    | 313.6 (312.3,314.8) | 295.8 (294.6,296.9) |
| White, non-Hispanic | 276.3 (275.6,277)   | 274.6 (274.1,275.1)    | 258.2 (257.7,258.6) | 260.1 (259.7,260.6) |
| Rural/Urban         |                     |                        |                     |                     |
| Rural               | 355 (353.8,356.2)   | 366.6 (365.4,367.8)    | 317.1 (315.9,318.3) | 330.2 (329, 331.4)  |
| Urban               | 318.1 (317.6,318.6) | 329.8 (329.3,330.3)    | 327.9 (327.4,328.4) | 335.6 (335.1,336.1) |
| Insurance           |                     |                        |                     |                     |
| Medicaid            | 631.8 (629.1,634.4) | 553 (550.9,555.2)      | 498.1 (496.2,500)   | 467 (465.4,468.7)   |
| Medicare            | 995.4 (993.6,997.1) | 1009.6 (1007.9,1011.3) | 911 (909.4,912.5)   | 895.3 (893.9,896.8) |
| Private             | 120.1 (119.7,120.4) | 116 (115.6,116.4)      | 110.7 (110.4,111.1) | 109.2 (108.9,109.5) |
| Uninsured           | 85.7 (85.1,86.2)    | 84.8 (84.2,85.3)       | 83.2 (82.6,83.8)    | 99 (98.2,99.7)      |

Rates were generated using average inpatient stays aggregated from pooled SID data from states AZ, FL, IA, KY, MD, NC, NE, NJ, NY, UT, VT.

Population estimates generated from pooled state populations estimated from the IPUMS USA American Community Survey for corresponding years.

All rates except insurance were age-standardized to the 2010 US Adult Population using population estimates available from the CDC Mortality

\*Average rates calculated from an average ED utilization rates from 2016 and 2017 estimates, as 2017 data was not available for select states.

\*\*Average use across states for Race estimates do not include NE and VT due to missing race variable and low n of numerator and denominator

\*\*Average use across states for Rural/Urban estimates do not include NJ due to lack of rural counties as defined by USDA supplied rural/urban

## Appendix 6. State-Specific Diabetes-Specific Hospitalization Rates Tables

**Appendix 6. Table 1.** Rates of Diabetes-Specific Diabetes Inpatient Stays per 10,000 Adults in Arizona; Years 2008-2017

| Variable                          | 2008            |                  |                         | 2011            |                  |                       | 2014            |                  |                       | 2017            |                  |                         | 2017-2008         |                  |                       |
|-----------------------------------|-----------------|------------------|-------------------------|-----------------|------------------|-----------------------|-----------------|------------------|-----------------------|-----------------|------------------|-------------------------|-------------------|------------------|-----------------------|
|                                   | # of I.P. Stays | Denominator      | Rate (c.i.)             | # of I.P. Stays | Denominator      | Rate (c.i.)           | # of I.P. Stays | Denominator      | Rate (c.i.)           | # of I.P. Stays | Denominator      | Rate (c.i.)             | Absolute $\Delta$ | Percent $\Delta$ | (c.i.)                |
| <b>Age</b>                        |                 |                  |                         |                 |                  |                       |                 |                  |                       |                 |                  |                         |                   |                  |                       |
| 18-29                             | 1,294           | 1,077,305        | 12 (11.4,12.7)          | 1,529           | 1,087,985        | 14.1 (13.3,14.8)      | 1,472           | 1,116,039        | 13.2 (12.5,13.9)      | 1,370           | 1,171,053        | 11.7 (11.1,12.3)        | -0.3              | -2.6             | (-8.7, 3.5)           |
| 30-44                             | 2,351           | 1,319,581        | 17.8 (17.1,18.5)        | 2,625           | 1,249,964        | 21 (20.2,21.8)        | 2,456           | 1,294,687        | 19 (18.2,19.7)        | 2,122           | 1,318,320        | 16.1 (15.4,16.8)        | -1.7              | -9.7             | (-14.1, -5.3)         |
| 45-64                             | 4,760           | 1,519,215        | 31.3 (30.4,32.2)        | 5,876           | 1,599,974        | 36.7 (35.8,37.7)      | 5,715           | 1,628,864        | 35.1 (34.2,36)        | 4,819           | 1,697,501        | 28.4 (27.6,29.2)        | -2.9              | -9.4             | (-12.6, -6.2)         |
| 65-74                             | 1,759           | 412,979          | 42.6 (40.6,44.6)        | 1,997           | 482,729          | 41.4 (39.6,43.2)      | 2,167           | 577,502          | 37.5 (35.9,39.1)      | 1,765           | 645,040          | 27.4 (26.1,28.6)        | -15.2             | -35.7            | (-40.5, -30.9)        |
| 75+                               | 1,945           | 447,485          | 43.5 (41.53,45.4)       | 2,108           | 439,111          | 48 (46,50.1)          | 1,815           | 493,146          | 36.8 (35.1,38.5)      | 1,509           | 552,520          | 27.3 (25.9,28.7)        | -16.2             | -37.2            | (-41.8, -32.6)        |
| <b>Sex</b>                        |                 |                  |                         |                 |                  |                       |                 |                  |                       |                 |                  |                         |                   |                  |                       |
| Female                            | 5,451           | 2,405,053        | 22.3 (21.7,22.9)        | 6,157           | 2,463,272        | 24.4 (23.8,25)        | 5,648           | 2,597,140        | 21.3 (20.7,21.8)      | 4,369           | 2,730,465        | 15.8 (15.3,16.2)        | -6.5              | -29.1            | (-31.8, -26.4)        |
| Male                              | 6,658           | 2,371,512        | 29.2 (28.5,29.9)        | 7,978           | 2,396,491        | 33.9 (33.1,34.6)      | 7,977           | 2,513,098        | 32 (31.3,32.7)        | 7,216           | 2,653,969        | 27.3 (26.7,27.9)        | -1.8              | -6.3             | (-9, -3.6)            |
| <b>Race/Ethnicity<sup>d</sup></b> |                 |                  |                         |                 |                  |                       |                 |                  |                       |                 |                  |                         |                   |                  |                       |
| White, Non-Hispanic               | -               | -                | -                       | -               | -                | -                     | 7,882           | 3,123,174        | 23.6 (23.1,24.2)      | 6,532           | 3,201,040        | 19.5 (19,20)            | -4.1              | -17.4            | (-20.4, -14.4)        |
| Black, Non-Hispanic               | -               | -                | -                       | -               | -                | -                     | 774             | 202,353          | 41.6 (38.6,44.6)      | 756             | 219,796          | 37.5 (34.7,40.2)        | -4.1              | -9.9             | (-18, -1.8)           |
| Hispanic                          | -               | -                | -                       | -               | -                | -                     | 3,316           | 1,353,068        | 30.3 (29.2,31.4)      | 3,086           | 1,480,422        | 25 (24.1,25.9)          | -5.3              | -17.5            | (-21.8, -13.2)        |
| <b>Rural/Urban</b>                |                 |                  |                         |                 |                  |                       |                 |                  |                       |                 |                  |                         |                   |                  |                       |
| Rural                             | 1,446           | 460,355          | 30.1 (28.5,31.7)        | 1,806           | 470,682          | 36 (34.3,37.7)        | 854             | 529,619          | 15.5 (14.5,16.6)      | 707             | 535,281          | 12.8 (11.9,13.8)        | -17.3             | -57.4            | (-62.6, -52.2)        |
| Urban                             | 10,663          | 4,316,210        | 25.1 (24.6,25.6)        | 12,329          | 4,389,081        | 28.2 (27.7,28.7)      | 12,771          | 4,580,619        | 27.8 (27.3,28.3)      | 10,878          | 4,849,153        | 22.3 (21.9,22.8)        | -2.8              | -11.0            | (-13.1, -8.9)         |
| <b>Insurance</b>                  |                 |                  |                         |                 |                  |                       |                 |                  |                       |                 |                  |                         |                   |                  |                       |
| Medicaid                          | 2,963           | 337,252          | 87.9 (84.7,91.0)        | 3,768           | 471,844          | 79.9 (77.3,82.4)      | 3,953           | 496,345          | 79.6 (77.2,82.1)      | 4,122           | 594,676          | 69.3 (67.2,71.4)        | -18.6             | -21.1            | (-24.8, -17.4)        |
| Medicare                          | 5,067           | 945,447          | 53.6 (52.1,55.1)        | 6,198           | 1,018,680        | 60.8 (59.3,62.4)      | 6,021           | 1,171,311        | 51.4 (50.1,52.7)      | 4,928           | 1,294,597        | 38.1 (37,39.1)          | -15.5             | -28.9            | (-31.7, -26.1)        |
| Private                           | 3,023           | 2,445,558        | 12.4 (11.9,12.8)        | 2,578           | 2,295,628        | 11.2 (10.8,11.7)      | 2,564           | 2,500,398        | 10.3 (9.9,10.7)       | 1,976           | 2,714,220        | 7.3 (7,7.6)             | -5.1              | -40.9            | (-44.9, -36.9)        |
| Uninsured                         | 698             | 874,954          | 7.98 (7.4,8.6)          | 1,315           | 894,434          | 14.7 (13.9,15.5)      | 894             | 744,112          | 12 (11.2,12.8)        | 370             | 583,927          | 6.3 (5.7,7)             | -1.7              | -21.1            | (-29.9, -12.3)        |
| <b>Total</b>                      | <b>12,109</b>   | <b>4,776,565</b> | <b>25.6 (25.1,26.0)</b> | <b>14,135</b>   | <b>4,859,763</b> | <b>29 (28.5,29.4)</b> | <b>13,625</b>   | <b>5,110,238</b> | <b>26.4 (26,26.9)</b> | <b>11,585</b>   | <b>5,384,434</b> | <b>21.3 (20.9,21.7)</b> | <b>-4.2</b>       | <b>-16.6</b>     | <b>(-18.6, -14.6)</b> |

<sup>a</sup> Total # of Inpatient Stays N=51,454

<sup>b</sup> All rates except Age-Specific and Insurance-Specific rates are age-standardized to the 2010 US Adult Population using data from the CDC Mortality Database

<sup>c</sup> The transition from ICD-9 CM/PCS to ICD-10 CM/PCS coding occurred in third quarter of 2015. Estimates reported from years post-2015 were estimated using ICD-10 codes and may not be directly comparable to rates estimated pre-2015.

<sup>d</sup> Value of - indicates estimate was not reported. All estimates n<=10 events or RSE>=30% were not reported. Additionally, HCUP prioritizes ethnicity when coding the uniform Race variable, AZ did not provide an ethnicity variable in 2008 and 2011. Percent change estimates for race/ethnicity subgroups for AZ were calculated using 2014 as the reference year.

**Appendix 6. Table 2.** Rates of Diabetes-Specific Diabetes Inpatient Stays per 10,000 Adults in Florida; Years 2008-2017

| Variable                          | 2008            |                   |                         | 2011            |                   |                         | 2014            |                   |                         | 2017            |                   |                         | 2017-2008         |                  |                   |
|-----------------------------------|-----------------|-------------------|-------------------------|-----------------|-------------------|-------------------------|-----------------|-------------------|-------------------------|-----------------|-------------------|-------------------------|-------------------|------------------|-------------------|
|                                   | # of I.P. Stays | Denominator       | Rate (c.i.)             | # of I.P. Stays | Denominator       | Rate (c.i.)             | # of I.P. Stays | Denominator       | Rate (c.i.)             | # of I.P. Stays | Denominator       | Rate (c.i.)             | Absolute $\Delta$ | Percent $\Delta$ | (c.i.)            |
| <b>Age</b>                        |                 |                   |                         |                 |                   |                         |                 |                   |                         |                 |                   |                         |                   |                  |                   |
| 18-29                             | 3,447           | 2,783,157         | 12.4 (12,12.8)          | 4,079           | 2,985,810         | 13.7 (13.2,14.1)        | 4,639           | 3,080,075         | 15.1 (14.6,15.5)        | 4,935           | 3,158,262         | 15.6 (15.2,16.1)        | 3.2               | 25.8             | (22, 29.6)        |
| 30-44                             | 6,552           | 3,590,210         | 18.2 (17.8,18.7)        | 7,134           | 3,545,422         | 20.1 (19.7,20.6)        | 7,998           | 3,668,380         | 21.8 (21.3,22.3)        | 7,111           | 3,857,687         | 18.4 (18,18.9)          | 0.2               | 1.1              | (-1.5, 3.7)       |
| 45-64                             | 16,132          | 4,764,788         | 33.9 (33.3,34.4)        | 19,030          | 5,173,375         | 36.8 (36.3,37.3)        | 21,150          | 5,296,412         | 39.9 (39.4,40.5)        | 19,678          | 5,554,964         | 35.4 (34.9,35.9)        | 1.5               | 4.4              | (2.3, 6.5)        |
| 65-74                             | 6,662           | 1,419,169         | 46.9 (45.8,48.1)        | 7,469           | 1,642,006         | 45.5 (44.5,46.5)        | 8,537           | 1,928,373         | 44.3 (43.3,45.2)        | 8,022           | 2,139,804         | 37.5 (36.7,38.3)        | -9.4              | -20.0            | (-22.5, -17.5)    |
| 75+                               | 9,631           | 1,762,049         | 54.7 (53.6,55.7)        | 10,222          | 1,718,192         | 59.5 (58.3,60.6)        | 9,969           | 1,868,050         | 53.4 (52.3,54.4)        | 8,759           | 2,074,993         | 42.2 (41.3,43.1)        | -12.5             | -22.9            | (-25.3, -20.5)    |
| <b>Sex</b>                        |                 |                   |                         |                 |                   |                         |                 |                   |                         |                 |                   |                         |                   |                  |                   |
| Female                            | 19,992          | 7,374,758         | 25 (24.6,25.3)          | 22,340          | 7,787,443         | 26.5 (26.2,26.9)        | 23,247          | 8,192,489         | 26.6 (26.2,26.9)        | 20,290          | 8,671,836         | 22 (21.7,22.3)          | -3                | -12.0            | (-13.9, -10.1)    |
| Male                              | 22,432          | 6,944,615         | 31.3 (30.9,31.7)        | 25,594          | 7,277,362         | 33.8 (33.4,34.2)        | 29,046          | 7,648,801         | 36.4 (36,36.8)          | 28,215          | 8,113,874         | 33.3 (32.9,33.7)        | 2                 | 6.4              | (4.9, 7.9)        |
| <b>Race/Ethnicity<sup>d</sup></b> |                 |                   |                         |                 |                   |                         |                 |                   |                         |                 |                   |                         |                   |                  |                   |
| White, Non-Hispanic               | -               | -                 | -                       | 26,286          | 9,124,354         | 25.6 (25.3,26)          | 28,665          | 9,299,079         | 27.8 (27.5,28.2)        | 25,703          | 9,542,674         | 24.9 (24.6,25.3)        | -0.7              | -2.7             | (-4.5, -0.9)      |
| Black, Non-Hispanic               | -               | -                 | -                       | 13,106          | 2,116,845         | 68.7 (67.5,69.9)        | 13,863          | 2,272,110         | 65.7 (64.5,66.8)        | 13,278          | 2,399,728         | 58.7 (57.7,59.7)        | -10               | -14.6            | (-16.5, -12.7)    |
| Hispanic                          | -               | -                 | -                       | 7,483           | 3,232,996         | 25.5 (24.9,26)          | 8,364           | 3,598,495         | 24.9 (24.3,25.4)        | 8,261           | 4,062,171         | 21.1 (20.7,21.6)        | -4.4              | -17.3            | (-19.6, -15)      |
| <b>Rural/Urban</b>                |                 |                   |                         |                 |                   |                         |                 |                   |                         |                 |                   |                         |                   |                  |                   |
| Rural                             | 2,914           | 1,020,740         | 26.9 (25.9,27.9)        | 3,315           | 1,051,316         | 28.8 (27.7,29.8)        | 2,441           | 963,272           | 23.7 (22.7,24.7)        | 2,249           | 998,650           | 21.6 (20.7,22.5)        | -5.3              | -19.7            | (-24, -15.4)      |
| Urban                             | 39,510          | 13,298,633        | 28 (27.7,28.3)          | 44,619          | 14,013,489        | 30.1 (29.8,30.3)        | 49,852          | 14,878,018        | 31.7 (31.4,32)          | 46,256          | 15,787,060        | 27.7 (27.5,28)          | -0.3              | -1.1             | (-1.9, -0.3)      |
| <b>Insurance</b>                  |                 |                   |                         |                 |                   |                         |                 |                   |                         |                 |                   |                         |                   |                  |                   |
| Medicaid                          | 5,344           | 519,576           | 103 (100.1,105.6)       | 7,858           | 790,678           | 99.4 (97.2,101.6)       | 8,941           | 973,616           | 91.8 (89.9,93.7)        | 7,890           | 1,010,681         | 78.1 (76.3,79.8)        | -24.8             | -24.1            | (-26.8, -21.4)    |
| Medicare                          | 21,751          | 3,436,830         | 63.3 (62.4,64.1)        | 24,736          | 3,674,467         | 67.3 (66.5,68.2)        | 26,742          | 4,124,206         | 64.8 (64.1,65.6)        | 23,768          | 4,525,869         | 52.5 (51.8,53.2)        | -10.8             | -17.1            | (-18.4, -15.8)    |
| Private                           | 8,157           | 6,973,815         | 11.7 (11.4,12)          | 7,232           | 6,712,132         | 10.8 (10.5,11)          | 8,070           | 7,392,875         | 10.9 (10.7,11.2)        | 8,460           | 8,391,459         | 10.1 (9.9,10.3)         | -1.6              | -13.7            | (-15.7, -11.7)    |
| Uninsured                         | 5,588           | 3,117,459         | 17.9 (17.5,18.4)        | 6,620           | 3,570,343         | 18.5 (18.1,19)          | 6,954           | 3,000,154         | 23.2 (22.6,23.7)        | 6,918           | 2,506,717         | 27.6 (26.9,28.2)        | 9.7               | 54.2             | (50.9, 57.5)      |
| <b>Total</b>                      | <b>42,424</b>   | <b>14,319,373</b> | <b>27.9 (27.6,28.2)</b> | <b>47,934</b>   | <b>15,064,805</b> | <b>29.9 (29.7,30.2)</b> | <b>52,293</b>   | <b>15,841,290</b> | <b>31.2 (30.9,31.5)</b> | <b>48,505</b>   | <b>16,785,710</b> | <b>27.4 (27.1,27.6)</b> | <b>-0.5</b>       | <b>-1.8</b>      | <b>(-2.6, -1)</b> |

<sup>a</sup> Total # of Inpatient Stays N=191,156

<sup>b</sup> All rates except Age-Specific and Insurance-Specific rates are age-standardized to the 2010 US Adult Population using data from the CDC Mortality Database

<sup>c</sup> The transition from ICD-9 CM/PCS to ICD-10 CM/PCS coding occurred in third quarter of 2015. Estimates reported from years post-2015 were estimated using ICD-10 codes and may not be directly comparable to rates estimated pre-2015.

<sup>d</sup> Value of - indicates estimate was not reported. All estimates n<=10 events or RSE>=30% were not reported. Additionally, HCUP prioritizes ethnicity when coding the uniform Race variable, FL, IA, and NC did not provide an ethnicity variable in 2008. Percent change estimates for race/ethnicity subgroups for these states were calculated using 2011 as the reference year.

**Appendix 6. Table 3.** Rates of Diabetes-Specific Diabetes Inpatient Stays per 10,000 Adults in Iowa; Years 2008-2017

|                             | 2008            |             |      |             | 2011            |             |      |             | 2014            |             |      |             | 2017            |             |      |             | 2017-2008  |           |                |
|-----------------------------|-----------------|-------------|------|-------------|-----------------|-------------|------|-------------|-----------------|-------------|------|-------------|-----------------|-------------|------|-------------|------------|-----------|----------------|
| Variable                    | # of I.P. Stays | Denominator | Rate | (c.i.)      | # of I.P. Stays | Denominator | Rate | (c.i.)      | # of I.P. Stays | Denominator | Rate | (c.i.)      | # of I.P. Stays | Denominator | Rate | (c.i.)      | Absolute Δ | Percent Δ | (c.i.)         |
| Age                         |                 |             |      |             |                 |             |      |             |                 |             |      |             |                 |             |      |             |            |           |                |
| 18-29                       | 502             | 514,831     | 9.8  | (8.9,10.6)  | 533             | 508,767     | 10.5 | (9.6,11.4)  | 568             | 511,098     | 11.1 | (10.2,12.0) | 579             | 519,925     | 11.1 | (10.2,12.0) | 1.4        | 14.3      | (3.5, 25.1)    |
| 30-44                       | 795             | 554,642     | 14.3 | (13.3,15.3) | 836             | 552,221     | 15.1 | (14.1,16.2) | 753             | 561,554     | 13.4 | (12.5,14.4) | 833             | 569,426     | 14.6 | (13.6,15.6) | 0.3        | 2.1       | (-6.2, 10.4)   |
| 45-64                       | 1,859           | 787,644     | 23.6 | (22.5,24.7) | 1,988           | 820,979     | 24.2 | (23.2,25.3) | 2,079           | 817,938     | 25.4 | (24.3,26.5) | 1,818           | 802,022     | 22.7 | (21.6,23.7) | -0.9       | -3.9      | (-9.2, 1.4)    |
| 65-74                       | 795             | 192,149     | 41.4 | (38.5,44.3) | 802             | 210,963     | 38.0 | (35.4,40.7) | 849             | 241,275     | 35.2 | (32.8,37.6) | 661             | 267,215     | 24.7 | (22.9,26.6) | -16.6      | -40.2     | (-47.2, -33.2) |
| 75+                         | 1,269           | 248,618     | 51.0 | (48.2,53.9) | 1,049           | 246,990     | 42.5 | (39.9,45.0) | 955             | 250,593     | 38.1 | (35.7,40.5) | 693             | 256,554     | 27.0 | (25,29.0)   | -24        | -47.1     | (-52.8, -41.4) |
| Sex                         |                 |             |      |             |                 |             |      |             |                 |             |      |             |                 |             |      |             |            |           |                |
| Female                      | 2,449           | 1,178,886   | 19.4 | (18.7,20.2) | 2,298           | 1,193,978   | 18.1 | (17.4,18.9) | 2,143           | 1,212,257   | 16.7 | (16.0,17.4) | 1,894           | 1,227,627   | 15.0 | (14.3,15.7) | -4.5       | -22.9     | (-27.4, -18.4) |
| Male                        | 2,771           | 1,118,998   | 25.0 | (24.1,25.9) | 2,910           | 1,145,942   | 25.3 | (24.4,26.2) | 3,061           | 1,170,201   | 25.7 | (24.8,26.7) | 2,690           | 1,187,515   | 22.4 | (21.6,23.3) | -2.6       | -10.3     | (-14.6, -6.0)  |
| Race/Ethnicity <sup>d</sup> |                 |             |      |             |                 |             |      |             |                 |             |      |             |                 |             |      |             |            |           |                |
| White, Non-Hispanic         | -               | -           | -    | -           | 4,672           | 2,118,989   | 20.8 | (20.2,21.4) | 4,591           | 2,131,366   | 20.2 | (19.6,20.8) | 3,933           | 2,128,722   | 17.7 | (17.1,18.2) | -3.1       | -15.0     | (-18.4, -11.6) |
| Black, Non-Hispanic         | -               | -           | -    | -           | 352             | 53,633      | 79.7 | (70.7,88.7) | 340             | 68,893      | 56.6 | (50.2,63.1) | 365             | 67,976      | 57.6 | (51.4,63.7) | -22.1      | -27.7     | (-39.2, -16.2) |
| Hispanic                    | -               | -           | -    | -           | 88              | 90,769      | 11.8 | (8.7,14.9)  | 146             | 102,599     | 19.0 | (15.4,22.7) | 142             | 114,337     | 19.3 | (15.2,23.4) | 7.5        | 63.5      | (27, 100)      |
| Rural/Urban                 |                 |             |      |             |                 |             |      |             |                 |             |      |             |                 |             |      |             |            |           |                |
| Rural                       | 2,537           | 1,159,789   | 19.9 | (19.1,20.7) | 2,340           | 1,155,609   | 18.7 | (17.9,19.5) | 2,212           | 917,459     | 22.1 | (21.1,23.0) | 1,954           | 907,571     | 20.3 | (19.4,21.3) | 0.4        | 2.2       | (-3, 7.4)      |
| Urban                       | 2,683           | 1,138,095   | 24.3 | (23.3,25.2) | 2,868           | 1,184,311   | 24.8 | (23.9,25.7) | 2,992           | 1,464,999   | 20.4 | (19.7,21.2) | 2,630           | 1,507,571   | 17.5 | (16.8,18.2) | -6.8       | -27.9     | (-31.8, -24.0) |
| Insurance                   |                 |             |      |             |                 |             |      |             |                 |             |      |             |                 |             |      |             |            |           |                |
| Medicaid                    | 696             | 96,410      | 72.2 | (66.8,77.6) | 833             | 114,769     | 72.6 | (67.7,77.5) | 1,041           | 161,225     | 64.6 | (60.7,68.5) | 1,205           | 197,985     | 60.9 | (57.4,64.3) | -11.3      | -15.7     | (-23.1, -8.3)  |
| Medicare                    | 2,831           | 487,455     | 58.1 | (55.9,60.2) | 2,686           | 509,930     | 52.7 | (50.7,54.7) | 2,680           | 551,939     | 48.6 | (46.7,50.4) | 2,166           | 573,828     | 37.8 | (36.2,39.3) | -20.3      | -35.0     | (-38.9, -31.1) |
| Private                     | 1,237           | 1,472,585   | 8.4  | (7.9,8.9)   | 1,265           | 1,443,397   | 8.8  | (8.28,9.3)  | 1,243           | 1,489,539   | 8.3  | (7.9,8.8)   | 1,076           | 1,498,814   | 7.2  | (6.8,7.6)   | -1.2       | -14.5     | (-20.9, -8.1)  |
| Uninsured                   | 366             | 221,821     | 16.5 | (14.8,18.2) | 308             | 244,747     | 12.6 | (11.2,14.0) | 185             | 159,690     | 11.6 | (9.9,13.3)  | 108             | 118,942     | 9.1  | (7.4,10.8)  | -7.4       | -45.0     | (-57.2, -32.8) |
| Total                       | 5,220           | 2,297,884   | 22.0 | (21.4,22.6) | 5,208           | 2,339,920   | 21.5 | (21.0,22.1) | 5,204           | 2,382,458   | 21.0 | (20.5,21.6) | 4,584           | 2,415,142   | 18.6 | (18.0,19.1) | -3.4       | -15.4     | (-18.5, -12.3) |

<sup>a</sup> Total # of Inpatient Stays N=20,216

<sup>b</sup> All rates except Age-Specific and Insurance-Specific rates are age-standardized to the 2010 US Adult Population using data from the CDC Mortality Database

<sup>c</sup> The transition from ICD-9 CM/PCS to ICD-10 CM/PCS coding occurred in third quarter of 2015. Estimates reported from years post-2015 were estimated using ICD-10 codes and may not be directly comparable to rates estimated pre-2015.

<sup>d</sup> Value of - indicates estimate was not reported. All estimates n<=10 events or RSE>=30% were not reported. Additionally, HCUP prioritizes ethnicity when coding the uniform Race variable, FL, IA, and NC did not provide an ethnicity variable in 2008. Percent change estimates for race/ethnicity subgroups for these states were calculated using 2011 as the reference year.

**Appendix 6. Table 4.** Rates of Diabetes-Specific Diabetes Inpatient Stays per 10,000 Adults in Kentucky; Years 2008-2017

| Variable              | 2008            |                  |                         | 2011            |                  |                         | 2014            |                  |                       | 2017            |                  |                         | 2017-2008         |                  |                   |
|-----------------------|-----------------|------------------|-------------------------|-----------------|------------------|-------------------------|-----------------|------------------|-----------------------|-----------------|------------------|-------------------------|-------------------|------------------|-------------------|
|                       | # of I.P. Stays | Denominator      | Rate (c.i.)             | # of I.P. Stays | Denominator      | Rate (c.i.)             | # of I.P. Stays | Denominator      | Rate (c.i.)           | # of I.P. Stays | Denominator      | Rate (c.i.)             | Absolute $\Delta$ | Percent $\Delta$ | (c.i.)            |
| <b>Age</b>            |                 |                  |                         |                 |                  |                         |                 |                  |                       |                 |                  |                         |                   |                  |                   |
| 18-29                 | 1,037           | 686,355          | 15.1 (14.2,16)          | 1,086           | 701,845          | 15.5 (14.6,16.4)        | 1,190           | 705,491          | 16.9 (15.9,17.8)      | 1,295           | 723,004          | 17.9 (16.9,18.9)        | 2.8               | 18.5             | (10.8, 26.2)      |
| 30-44                 | 1,742           | 875,762          | 19.9 (19,20.8)          | 2,192           | 854,038          | 25.7 (24.6,26.7)        | 2,165           | 844,789          | 25.6 (24.5,26.7)      | 1,947           | 828,086          | 23.5 (22.5,24.6)        | 3.6               | 18.1             | (12.2, 24)        |
| 45-64                 | 3,784           | 1,141,903        | 33.1 (32.1,34.2)        | 4,638           | 1,197,727        | 38.7 (37.6,39.8)        | 5,060           | 1,195,181        | 42.3 (41.2,43.5)      | 4,585           | 1,181,324        | 38.8 (37.7,39.9)        | 5.7               | 17.2             | (13.3, 21.1)      |
| 65-74                 | 1,428           | 282,371          | 50.6 (47.9,53.2)        | 1,597           | 310,591          | 51.4 (48.9,53.9)        | 1,737           | 361,611          | 48 (45.8,50.3)        | 1,557           | 388,350          | 40.1 (38.1,42.1)        | -10.5             | -20.8            | (-26.1, -15.5)    |
| 75+                   | 1,549           | 278,395          | 55.6 (52.9,58.4)        | 1,618           | 283,281          | 57.1 (54.3,59.9)        | 1,657           | 292,355          | 56.7 (53.9,59.4)      | 1,235           | 320,578          | 38.5 (36.4,40.7)        | -17.1             | -30.8            | (-36.1, -25.5)    |
| <b>Sex</b>            |                 |                  |                         |                 |                  |                         |                 |                  |                       |                 |                  |                         |                   |                  |                   |
| Female                | 4,817           | 1,687,215        | 27.8 (27,28.6)          | 5,263           | 1,723,771        | 29.6 (28.8,30.4)        | 5,424           | 1,745,872        | 30.1 (29.3,30.9)      | 4,582           | 1,769,085        | 25.4 (24.7,26.1)        | -2.4              | -8.6             | (-12, -5.2)       |
| Male                  | 4,723           | 1,577,571        | 30.6 (29.7,31.5)        | 5,868           | 1,623,711        | 36.4 (35.5,37.4)        | 6,385           | 1,653,555        | 38.5 (37.5,39.4)      | 6,037           | 1,672,257        | 35.8 (34.9,36.7)        | 5.2               | 17.0             | (13.5, 20.5)      |
| <b>Race/Ethnicity</b> |                 |                  |                         |                 |                  |                         |                 |                  |                       |                 |                  |                         |                   |                  |                   |
| White, Non-Hispanic   | 8,018           | 2,914,443        | 27 (26.4,27.6)          | 9,719           | 2,936,726        | 32.2 (31.6,32.8)        | 10,192          | 2,963,813        | 33.2 (32.6,33.9)      | 9,018           | 2,974,103        | 29.5 (28.9,30.1)        | 2.5               | 9.3              | (6.7, 11.9)       |
| Black, Non-Hispanic   | 1,040           | 228,993          | 49.4 (46.3,52.5)        | 1,274           | 256,770          | 54 (50.9,57)            | 1,326           | 257,591          | 54.1 (51.1,57)        | 1,402           | 267,804          | 54.8 (51.9,57.7)        | 5.4               | 10.9             | (3.6, 18.2)       |
| Hispanic              | 39              | 60,828           | 9 (5.4,12.6)            | 69              | 81,175           | 11.4 (8.4,14.3)         | 181             | 89,378           | 33.4 (27.7,39.1)      | 111             | 95,903           | 16.3 (12.7,19.9)        | 7.3               | 81.1             | (34.4, 127.8)     |
| <b>Rural/Urban</b>    |                 |                  |                         |                 |                  |                         |                 |                  |                       |                 |                  |                         |                   |                  |                   |
| Rural                 | 4,735           | 1,456,541        | 31.9 (31,32.8)          | 5,432           | 1,450,065        | 36.4 (35.4,37.3)        | 5,690           | 1,301,804        | 42.1 (41,43.2)        | 4,827           | 1,300,430        | 36 (34.9,37)            | 4.1               | 12.9             | (9.2, 16.6)       |
| Urban                 | 4,805           | 1,808,245        | 26.8 (26,27.6)          | 5,699           | 1,897,417        | 30.1 (29.3,30.9)        | 6,119           | 2,097,623        | 28.9 (28.2,29.7)      | 5,792           | 2,140,912        | 26.8 (26.1,27.5)        | 0                 | 0.0              | (-3.5, 3.5)       |
| <b>Insurance</b>      |                 |                  |                         |                 |                  |                         |                 |                  |                       |                 |                  |                         |                   |                  |                   |
| Medicaid              | 1,781           | 200,703          | 88.7 (84.6,92.9)        | 2,057           | 212,517          | 96.8 (92.6,101)         | 3,268           | 375,297          | 87.1 (84.1,90.1)      | 3,442           | 512,109          | 67.2 (65,69.5)          | -21.5             | -24.2            | (-28.6, -19.8)    |
| Medicare              | 4,379           | 701,873          | 62.4 (60.5,64.2)        | 5,410           | 761,230          | 71.1 (69.2,73)          | 5,740           | 819,549          | 70 (68.2,71.9)        | 4,829           | 871,862          | 55.4 (53.8,56.9)        | -7                | -11.2            | (-14.4, -8)       |
| Private               | 2,291           | 1,788,932        | 12.8 (12.3,13.3)        | 2,166           | 1,709,024        | 12.7 (12.1,13.2)        | 2,304           | 1,776,836        | 13 (12.4,13.5)        | 1,965           | 1,773,309        | 11.1 (10.6,11.6)        | -1.7              | -13.3            | (-17.9, -8.7)     |
| Uninsured             | 835             | 513,674          | 16.3 (15.2,17.4)        | 1,403           | 592,445          | 23.7 (22.4,24.9)        | 343             | 361,709          | 9.5 (8.5,10.5)        | 223             | 217,001          | 10.3 (8.9,11.6)         | -6                | -36.8            | (-46.1, -27.5)    |
| <b>Total</b>          | <b>9,540</b>    | <b>3,264,786</b> | <b>29.1 (28.5,29.7)</b> | <b>11,131</b>   | <b>3,347,482</b> | <b>32.8 (32.2,33.4)</b> | <b>11,809</b>   | <b>3,399,427</b> | <b>34 (33.4,34.6)</b> | <b>10,619</b>   | <b>3,441,342</b> | <b>30.3 (29.7,30.9)</b> | <b>1.2</b>        | <b>4.1</b>       | <b>(1.7, 6.5)</b> |

<sup>a</sup> Total # of Inpatient Stays N=43,099

<sup>b</sup> All rates except Age-Specific and Insurance-Specific rates are age-standardized to the 2010 US Adult Population using data from the CDC Mortality Database

<sup>c</sup> The transition from ICD-9 CM/PCS to ICD-10 CM/PCS coding occurred in third quarter of 2015. Estimates reported from years post-2015 were estimated using ICD-10 codes and may not be directly comparable to rates estimated pre-2015.



**Appendix 6. Table 5.** Rates of Diabetes-Specific Diabetes Inpatient Stays per 10,000 Adults in Maryland; Years 2008-2017

| Variable              | 2008            |                  |                         | 2011            |                  |                         | 2014            |                  |                         | 2017            |                  |                         | 2017-2008         |                  |                     |
|-----------------------|-----------------|------------------|-------------------------|-----------------|------------------|-------------------------|-----------------|------------------|-------------------------|-----------------|------------------|-------------------------|-------------------|------------------|---------------------|
|                       | # of I.P. Stays | Denominator      | Rate (c.i.)             | # of I.P. Stays | Denominator      | Rate (c.i.)             | # of I.P. Stays | Denominator      | Rate (c.i.)             | # of I.P. Stays | Denominator      | Rate (c.i.)             | Absolute $\Delta$ | Percent $\Delta$ | (c.i.)              |
| <b>Age</b>            |                 |                  |                         |                 |                  |                         |                 |                  |                         |                 |                  |                         |                   |                  |                     |
| 18-29                 | 1,032           | 925,017          | 11.2 (10.5,11.8)        | 1,237           | 961,324          | 12.9 (12.2,13.6)        | 1,221           | 981,853          | 12.4 (11.7,13.1)        | 1,072           | 956,139          | 11.2 (10.5,11.9)        | 0                 | 0.0              | (-6.3, 6.3)         |
| 30-44                 | 2,156           | 1,179,901        | 18.3 (17.5,19)          | 2,208           | 1,168,164        | 18.9 (18.1,19.7)        | 1,992           | 1,184,647        | 16.8 (16.1,17.6)        | 1,593           | 1,197,106        | 13.3 (12.7,14)          | -5                | -27.3            | (-31.8, -22.8)      |
| 45-64                 | 5,331           | 1,509,065        | 35.3 (34.4,36.3)        | 5,842           | 1,622,154        | 36 (35.1,36.9)          | 5,703           | 1,643,919        | 34.7 (33.8,35.6)        | 4,418           | 1,653,684        | 26.7 (25.9,27.5)        | -8.6              | -24.4            | (-27.4, -21.4)      |
| 65-74                 | 2,086           | 336,994          | 61.9 (59.2,64.6)        | 1,948           | 376,339          | 51.8 (49.5,54.1)        | 2,113           | 445,619          | 47.4 (45.4,49.4)        | 1,740           | 488,375          | 35.6 (34,37.3)          | -26.3             | -42.5            | (-46.9, -38.1)      |
| 75+                   | 2,621           | 347,770          | 75.4 (72.5,78.3)        | 2,349           | 354,276          | 66.3 (63.6,69)          | 2,058           | 373,097          | 55.2 (52.8,57.5)        | 1,713           | 411,753          | 41.6 (39.6,43.6)        | -33.8             | -44.8            | (-48.7, -40.9)      |
| <b>Sex</b>            |                 |                  |                         |                 |                  |                         |                 |                  |                         |                 |                  |                         |                   |                  |                     |
| Female                | 6,158           | 2,254,179        | 26.7 (26.1,27.4)        | 6,392           | 2,347,748        | 26.6 (25.9,27.2)        | 5,861           | 2,421,400        | 23.5 (22.9,24.1)        | 4,357           | 2,457,969        | 17 (16.5,17.5)          | -9.7              | -36.3            | (-38.9, -33.7)      |
| Male                  | 7,068           | 2,044,568        | 36.3 (35.5,37.2)        | 7,192           | 2,134,509        | 34.7 (33.9,35.5)        | 7,226           | 2,207,735        | 33.2 (32.4,34.0)        | 6,179           | 2,249,088        | 27.4 (26.7,28.1)        | -8.9              | -24.5            | (-26.8, -22.2)      |
| <b>Race/Ethnicity</b> |                 |                  |                         |                 |                  |                         |                 |                  |                         |                 |                  |                         |                   |                  |                     |
| White, Non-Hispanic   | 6,403           | 2555841          | 23.5 (22.9,24.1)        | 6,497           | 2542349          | 23.7 (23.1,24.3)        | 6,149           | 2540532          | 22.2 (21.6,22.8)        | 4,773           | 2,504,317        | 17.5 (17,18)            | -6                | -25.5            | (-28.5, -22.5)      |
| Black, Non-Hispanic   | 6,288           | 1199144          | 57.6 (56.1,59)          | 6,439           | 1269315          | 54 (52.7,55.3)          | 6,107           | 1325983          | 47.8 (46.5,49.0)        | 5,002           | 1,367,328        | 37.2 (36.1,38.2)        | -20.4             | -35.4            | (-37.9, -32.9)      |
| Hispanic              | 251             | 248620           | 14.1 (12.1,16.1)        | 319             | 333408           | 14.8 (12.9,16.7)        | 453             | 377452           | 17.8 (15.8,19.8)        | 410             | 408,745          | 13.4 (11.9,14.9)        | -0.7              | -5.0             | (-20, 10)           |
| <b>Rural/Urban</b>    |                 |                  |                         |                 |                  |                         |                 |                  |                         |                 |                  |                         |                   |                  |                     |
| Rural                 | 903             | 256,663          | 35.1 (32.8,37.4)        | 957             | 264,105          | 34.9 (32.7,37.1)        | 518             | 286,834          | 17.3 (15.8,18.8)        | 338             | 291,832          | 10.8 (9.6,12)           | -24.3             | -69.2            | (-75.5, -62.9)      |
| Urban                 | 12,323          | 4,042,084        | 30.9 (30.4,31.5)        | 12,627          | 4,218,152        | 30 (29.5,30.5)          | 12,569          | 4,342,301        | 28.7 (28.2,29.2)        | 10,198          | 4,415,225        | 22.6 (22.1,23)          | -8.3              | -26.9            | (-28.8, -25)        |
| <b>Insurance</b>      |                 |                  |                         |                 |                  |                         |                 |                  |                         |                 |                  |                         |                   |                  |                     |
| Medicaid              | 2,159           | 146,118          | 148 (141.5,154)         | 2,684           | 259,084          | 104 (99.7,107.5)        | 3,244           | 381,128          | 85.1 (82.2,88.0)        | 2,813           | 425,596          | 66.1 (63.7,68.5)        | -81.7             | -55.3            | (-59.1, -51.5)      |
| Medicare              | 6,277           | 736,236          | 85.3 (83.1,87.4)        | 6,138           | 794,757          | 77.2 (75.3,79.2)        | 6,130           | 889,220          | 68.9 (67.2,70.7)        | 4,925           | 967,979          | 50.9 (49.5,52.3)        | -34.4             | -40.3            | (-42.8, -37.8)      |
| Private               | 3,495           | 2,781,283        | 12.6 (12.1,13)          | 3,512           | 2,790,686        | 12.6 (12.2,13)          | 3,197           | 2,819,513        | 11.3 (11.0,11.7)        | 2,361           | 2,879,302        | 8.2 (7.9,8.5)           | -4.4              | -34.9            | (-38.6, -31.2)      |
| Uninsured             | 1,110           | 555,310          | 20 (18.8,21.2)          | 1,071           | 548,093          | 19.5 (18.4,20.7)        | 369             | 443,011          | 8.3 (7.5,9.2)           | 221             | 332,280          | 6.7 (5.8,7.5)           | -13.3             | -66.5            | (-72.4, -60.6)      |
| <b>Total</b>          | <b>13,226</b>   | <b>4,298,747</b> | <b>31.2 (30.6,31.7)</b> | <b>13,584</b>   | <b>4,482,257</b> | <b>30.3 (29.8,30.8)</b> | <b>13,087</b>   | <b>4,629,135</b> | <b>27.9 (27.5,28.4)</b> | <b>10,536</b>   | <b>4,707,057</b> | <b>21.8 (21.4,22.2)</b> | <b>-9.4</b>       | <b>-30.1</b>     | <b>(-32, -28.2)</b> |

<sup>a</sup> Total # of Inpatient Stays N=50,433

<sup>b</sup> All rates except Age-Specific and Insurance-Specific rates are age-standardized to the 2010 US Adult Population using data from the CDC Mortality Database

<sup>c</sup> The transition from ICD-9 CM/PCS to ICD-10 CM/PCS coding occurred in third quarter of 2015. Estimates reported from years post-2015 were estimated using ICD-10 codes and may not be directly comparable to rates estimated pre-2015.

**Appendix 6. Table 6.** Rates of Diabetes-Specific Diabetes Inpatient Stays per 10,000 Adults in North Carolina; Years 2008-2017

| Variable                          | 2008            |                  |           |                    | 2011            |                  |             |                    | 2014            |                  |             |                    | 2017            |                  |             |                    | 2017-2008         |                  |                   |
|-----------------------------------|-----------------|------------------|-----------|--------------------|-----------------|------------------|-------------|--------------------|-----------------|------------------|-------------|--------------------|-----------------|------------------|-------------|--------------------|-------------------|------------------|-------------------|
|                                   | # of I.P. Stays | Denominator      | Rate      | (c.i.)             | # of I.P. Stays | Denominator      | Rate        | (c.i.)             | # of I.P. Stays | Denominator      | Rate        | (c.i.)             | # of I.P. Stays | Denominator      | Rate        | (c.i.)             | Absolute $\Delta$ | Percent $\Delta$ | (c.i.)            |
| <b>Age</b>                        |                 |                  |           |                    |                 |                  |             |                    |                 |                  |             |                    |                 |                  |             |                    |                   |                  |                   |
| 18-29                             | 1,911           | 1,506,878        | 12.7      | (12.1,13.3)        | 2,499           | 1,579,505        | 15.8        | (15.2,16.4)        | 2,446           | 1,629,692        | 15.0        | (14.4,15.6)        | 2,702           | 1,675,318        | 16.1        | (15.5,16.7)        | 3.4               | 27.0             | (21.6, 32.4)      |
| 30-44                             | 3,633           | 1,966,936        | 18.5      | (17.9,19.1)        | 3,964           | 1,956,756        | 20.3        | (19.6,20.9)        | 4,403           | 1,964,562        | 22.4        | (21.8,23.1)        | 3,926           | 1,964,144        | 20.0        | (19.4,20.6)        | 1.5               | 8.3              | (4.4, 12.2)       |
| 45-64                             | 7,737           | 2,367,982        | 32.7      | (32.0,33.4)        | 8,967           | 2,553,324        | 35.1        | (34.4,35.8)        | 9,426           | 2,599,340        | 36.3        | (35.5,37)          | 8,892           | 2,704,704        | 32.9        | (32.2,33.6)        | 0.2               | 0.7              | (-1.7, 3.1)       |
| 65-74                             | 2,831           | 576,439          | 49.1      | (47.3,51.0)        | 3,125           | 671,783          | 46.5        | (44.9,48.1)        | 3,346           | 811,978          | 41.2        | (39.8,42.6)        | 3,124           | 909,997          | 34.3        | (33.1,35.5)        | -14.8             | -30.2            | (-33.9, -26.5)    |
| 75+                               | 3,204           | 562,439          | 57.0      | (55.0,59.0)        | 3,378           | 604,764          | 55.9        | (54,57.7)          | 3,209           | 649,047          | 49.4        | (47.7,51.2)        | 2,769           | 718,475          | 38.5        | (37.1,40)          | -18.5             | -32.4            | (-36, -28.8)      |
| <b>Sex</b>                        |                 |                  |           |                    |                 |                  |             |                    |                 |                  |             |                    |                 |                  |             |                    |                   |                  |                   |
| Female                            | 9,331           | 3,621,428        | 25.3      | (24.8,25.8)        | 10,652          | 3,837,059        | 27.2        | (26.6,27.7)        | 10,541          | 3,986,470        | 25.8        | (25.3,26.3)        | 9,302           | 4,153,432        | 21.9        | (21.5,22.4)        | -3.4              | -13.4            | (-15.5, -11.3)    |
| Male                              | 9,985           | 3,359,246        | 31.2      | (30.6,31.9)        | 11,281          | 3,529,073        | 32.7        | (32.1,33.3)        | 12,289          | 3,668,149        | 33.8        | (33.2,34.4)        | 12,111          | 3,819,206        | 31.6        | (31,32.1)          | 0.4               | 1.2              | (-1.1, 3.5)       |
| <b>Race/Ethnicity<sup>d</sup></b> |                 |                  |           |                    |                 |                  |             |                    |                 |                  |             |                    |                 |                  |             |                    |                   |                  |                   |
| White, Non-Hispanic               | -               | -                | -         | -                  | 11,897          | 5,012,355        | 22.6        | (22.2,23)          | 12,389          | 5,142,267        | 22.9        | (22.5,23.3)        | 11,362          | 5,276,746        | 20.6        | (20.2,21)          | -2                | -8.8             | (-10.9, -6.7)     |
| Black, Non-Hispanic               | -               | -                | -         | -                  | 8,767           | 1,525,444        | 60.4        | (59.1,61.6)        | 8,906           | 1,599,624        | 57.4        | (56.2,58.6)        | 8,357           | 1,663,098        | 51.2        | (50.1,52.3)        | -9.2              | -15.2            | (-17.7, -12.7)    |
| Hispanic                          | -               | -                | -         | -                  | 473             | 507,001          | 18.2        | (16,20.3)          | 677             | 543,612          | 20.8        | (18.9,22.8)        | 783             | 591,627          | 19.3        | (17.6,20.9)        | 1.1               | 6.0              | (-6.3, 18.3)      |
| <b>Rural/Urban</b>                |                 |                  |           |                    |                 |                  |             |                    |                 |                  |             |                    |                 |                  |             |                    |                   |                  |                   |
| Rural                             | 7,037           | 2,169,085        | 31.6      | (30.9,32.4)        | 7,669           | 2,265,395        | 32.5        | (31.8,33.3)        | 6,739           | 2,284,763        | 28.3        | (27.6,29)          | 6,134           | 2,319,651        | 25.7        | (25,26.3)          | -5.9              | -18.7            | (-21.2, -16.2)    |
| Urban                             | 12,279          | 4,811,589        | 26.4      | (26.0,26.9)        | 14,264          | 5,100,737        | 28.5        | (28,28.9)          | 16,091          | 5,369,856        | 30.1        | (29.6,30.5)        | 15,279          | 5,652,987        | 26.9        | (26.4,27.3)        | 0.5               | 1.9              | (-0.1, 3.9)       |
| <b>Insurance</b>                  |                 |                  |           |                    |                 |                  |             |                    |                 |                  |             |                    |                 |                  |             |                    |                   |                  |                   |
| Medicaid                          | 3,213           | 313,186          | 102.6     | (99.0,106.1)       | 3,843           | 407,701          | 94.3        | (91.3,97.2)        | 3,892           | 440,204          | 88.4        | (85.6,91.2)        | 4,058           | 487,943          | 83.2        | (80.6,85.7)        | -19.4             | -18.9            | (-22.5, -15.3)    |
| Medicare                          | 8,895           | 1,352,260        | 65.8      | (64.4,67.1)        | 10,006          | 1,522,184        | 65.7        | (64.4,67)          | 9,375           | 1,709,304        | 54.8        | (53.7,56)          | 7,835           | 1,871,776        | 41.9        | (40.9,42.8)        | -23.9             | -36.3            | (-38.5, -34.1)    |
| Private                           | 4,577           | 3,877,629        | 11.8      | (11.5,12.2)        | 4,982           | 3,785,857        | 13.2        | (12.8,13.5)        | 6,256           | 4,075,326        | 15.4        | (15,15.7)          | 6,082           | 4,344,322        | 14.0        | (13.6,14.4)        | 2.2               | 18.6             | (14.9, 22.3)      |
| Uninsured                         | 2,231           | 1,220,469        | 18.3      | (17.5,19.0)        | 2,664           | 1,398,146        | 19.1        | (18.3,19.8)        | 2,854           | 1,180,182        | 24.2        | (23.3,25.1)        | 2,975           | 998,211          | 29.8        | (28.7,30.9)        | 11.5              | 63.0             | (57.3, 68.7)      |
| <b>Total</b>                      | <b>19,316</b>   | <b>6,980,674</b> | <b>28</b> | <b>(27.6,28.4)</b> | <b>21,933</b>   | <b>7,366,132</b> | <b>29.7</b> | <b>(29.3,30.1)</b> | <b>22,830</b>   | <b>7,654,619</b> | <b>29.5</b> | <b>(29.1,29.9)</b> | <b>21,413</b>   | <b>7,972,638</b> | <b>26.4</b> | <b>(26.1,26.8)</b> | <b>-1.6</b>       | <b>-5.7</b>      | <b>(-7.4, -4)</b> |

<sup>a</sup> Total # of Inpatient Stays N=85,492

<sup>b</sup> All rates except Age-Specific and Insurance-Specific rates are age-standardized to the 2010 US Adult Population using data from the CDC Mortality Database

<sup>c</sup> The transition from ICD-9 CM/PCS to ICD-10 CM/PCS coding occurred in third quarter of 2015. Estimates reported from years post-2015 were estimated using ICD-10 codes and may not be directly comparable to rates estimated pre-2015.

<sup>d</sup> Value of - indicates estimate was not reported. All estimates n<=10 events or RSE>=30% were not reported. Additionally, HCUP prioritizes ethnicity when coding the uniform Race variable, FL, IA, and NC did not provide an ethnicity variable in 2008. Percent change estimates for race/ethnicity subgroups for these states were calculated using 2011 as the reference year.

**Appendix 6. Table 7.** Rates of Diabetes-Specific Diabetes Inpatient Stays per 10,000 Adults in Nebraska; Years 2008-2017

| Variable                          | 2008            |             |                  | 2011            |             |                  | 2014            |             |                  | 2017            |             |                  | 2017-2008         |                  |                |
|-----------------------------------|-----------------|-------------|------------------|-----------------|-------------|------------------|-----------------|-------------|------------------|-----------------|-------------|------------------|-------------------|------------------|----------------|
|                                   | # of I.P. Stays | Denominator | Rate (c.i.)      | # of I.P. Stays | Denominator | Rate (c.i.)      | # of I.P. Stays | Denominator | Rate (c.i.)      | # of I.P. Stays | Denominator | Rate (c.i.)      | Absolute $\Delta$ | Percent $\Delta$ | (c.i.)         |
| <b>Age</b>                        |                 |             |                  |                 |             |                  |                 |             |                  |                 |             |                  |                   |                  |                |
| 18-29                             | 200             | 306,221     | 6.5 (5.6,7.4)    | 327             | 315,155     | 10.4 (9.3,11.5)  | 337             | 310,033     | 10.9 (9.7,12)    | 373             | 316,312     | 11.8 (10.6,13)   | 5.3               | 81.5             | (61.7, 101.3)  |
| 30-44                             | 312             | 335,474     | 9.3 (8.3,10.3)   | 340             | 337,329     | 10.1 (9,11.2)    | 450             | 360,994     | 12.5 (11.3,13.6) | 395             | 364,731     | 10.8 (9.8,11.9)  | 1.5               | 16.1             | (3.6, 28.6)    |
| 45-64                             | 960             | 449,350     | 21.4 (20,22.7)   | 1,075           | 480,215     | 22.4 (21,23.7)   | 1,096           | 470,520     | 23.3 (21.9,24.7) | 1,033           | 469,395     | 22 (20.7,23.3)   | 0.6               | 2.8              | (-4.8, 10.4)   |
| 65-74                             | 375             | 107,290     | 35 (31.4,38.5)   | 383             | 114,778     | 33.4 (30,36.7)   | 411             | 137,087     | 30 (27.1,32.9)   | 449             | 153,222     | 29.3 (26.6,32)   | -5.7              | -16.3            | (-27.1, -5.5)  |
| 75+                               | 646             | 129,899     | 49.7 (45.9,53.6) | 535             | 135,971     | 39.3 (36,42.7)   | 505             | 134,303     | 37.6 (34.3,40.9) | 446             | 141,352     | 31.6 (28.6,34.5) | -18.1             | -36.4            | (-44.7, -28.1) |
| <b>Sex</b>                        |                 |             |                  |                 |             |                  |                 |             |                  |                 |             |                  |                   |                  |                |
| Female                            | 1,136           | 680,017     | 15.7 (14.8,16.7) | 1,186           | 706,151     | 16.1 (15.2,17)   | 1,265           | 717,025     | 17 (16.1,18)     | 1,139           | 729,285     | 15.1 (14.2,16)   | -0.6              | -3.8             | (-11.2, 3.6)   |
| Male                              | 1,357           | 648,217     | 21.7 (20.6,22.9) | 1,474           | 677,297     | 22 (20.8,23.1)   | 1,534           | 695,912     | 22.3 (21.2,23.4) | 1,557           | 715,727     | 21.8 (20.7,22.8) | 0.1               | 0.5              | (-6, 7)        |
| <b>Race/Ethnicity<sup>d</sup></b> |                 |             |                  |                 |             |                  |                 |             |                  |                 |             |                  |                   |                  |                |
| White, Non-Hispanic               | -               | -           | -                | -               | -           | -                | -               | -           | -                | -               | -           | -                | -                 | -                | -              |
| Black, Non-Hispanic               | -               | -           | -                | -               | -           | -                | -               | -           | -                | -               | -           | -                | -                 | -                | -              |
| Hispanic                          | -               | -           | -                | -               | -           | -                | -               | -           | -                | -               | -           | -                | -                 | -                | -              |
| <b>Rural/Urban</b>                |                 |             |                  |                 |             |                  |                 |             |                  |                 |             |                  |                   |                  |                |
| Rural                             | 1,181           | 569,030     | 18.4 (17.4,19.5) | 1,072           | 576,261     | 16.9 (15.8,17.9) | 1,074           | 576,096     | 17.5 (16.4,18.6) | 977             | 574,919     | 15.6 (14.6,16.6) | -2.8              | -15.2            | (-22.2, -8.2)  |
| Urban                             | 1,312           | 759,204     | 18.5 (17.5,19.5) | 1,588           | 807,187     | 20.5 (19.5,21.5) | 1,725           | 836,841     | 21.3 (20.3,22.3) | 1,719           | 870,093     | 20.1 (19.2,21.1) | 1.6               | 8.6              | (2.3, 14.9)    |
| <b>Insurance</b>                  |                 |             |                  |                 |             |                  |                 |             |                  |                 |             |                  |                   |                  |                |
| Medicaid                          | 232             | 40,626      | 57.1 (49.8,64.5) | 241             | 47,356      | 50.9 (44.5,57.3) | 220             | 51,743      | 42.5 (36.9,48.1) | 353             | 54,807      | 64.4 (57.7,71.1) | 7.3               | 12.8             | (-1.7, 27.3)   |
| Medicare                          | 1,390           | 262,843     | 52.9 (50.1,55.7) | 1,294           | 278,804     | 46.4 (43.9,48.9) | 1,352           | 299,763     | 45.1 (42.7,47.5) | 1,258           | 316,330     | 39.8 (37.6,42)   | -13.1             | -24.8            | (-30.4, -19.2) |
| Private                           | 719             | 847,442     | 8.5 (7.9,9.1)    | 878             | 837,009     | 10.5 (9.8,11.2)  | 966             | 876,007     | 11 (10.3,11.7)   | 884             | 906,023     | 9.8 (9.1,10.4)   | 1.3               | 15.3             | (7.1, 23.5)    |
| Uninsured                         | 108             | 153,935     | 7 (5.7,8.3)      | 196             | 181,493     | 10.8 (9.3,12.3)  | 209             | 150,163     | 13.9 (12,15.8)   | 101             | 135,703     | 7.4 (6,8.9)      | 0.4               | 5.7              | (-17.6, 29)    |
| Total                             | 2,493           | 1,328,234   | 18.5 (17.7,19.2) | 2,660           | 1,383,448   | 18.9 (18.2,19.6) | 2,799           | 1,412,937   | 19.5 (18.8,20.2) | 2,696           | 1,445,012   | 18.3 (17.6,19)   | -0.2              | -1.1             | (-6.1, 3.9)    |

<sup>a</sup> Total # of Inpatient Stays N=10,648

<sup>b</sup> All rates except Age-Specific and Insurance-Specific rates are age-standardized to the 2010 US Adult Population using data from the CDC Mortality Database

<sup>c</sup> The transition from ICD-9 CM/PCS to ICD-10 CM/PCS coding occurred in third quarter of 2015. Estimates reported from years post-2015 were estimated using ICD-10 codes and may not be directly comparable to rates estimated pre-2015.

<sup>d</sup> Value of - indicates estimate was not reported. All estimates n<=10 events or RSE>=30% were not reported. Nebraska did not provide a race variable to HCUP.

**Appendix 6. Table 8.** Rates of Diabetes-Specific Diabetes Inpatient Stays per 10,000 Adults in New Jersey; Years 2008-2017

| Variable                       | 2008            |             |                  | 2011            |             |                  | 2014            |             |                  | 2017            |             |                  | 2017-2008         |                  |                |
|--------------------------------|-----------------|-------------|------------------|-----------------|-------------|------------------|-----------------|-------------|------------------|-----------------|-------------|------------------|-------------------|------------------|----------------|
|                                | # of I.P. Stays | Denominator | Rate (c.i.)      | # of I.P. Stays | Denominator | Rate (c.i.)      | # of I.P. Stays | Denominator | Rate (c.i.)      | # of I.P. Stays | Denominator | Rate (c.i.)      | Absolute $\Delta$ | Percent $\Delta$ | (c.i.)         |
| <b>Age</b>                     |                 |             |                  |                 |             |                  |                 |             |                  |                 |             |                  |                   |                  |                |
| 18-29                          | 1,159           | 1,306,349   | 8.9 (8.4,9.4)    | 1,363           | 1,324,379   | 10.3 (9.7,10.8)  | 1,510           | 1,367,695   | 11 (10.5,11.6)   | 1,346           | 1,372,927   | 9.8 (9.3,10.3)   | 0.9               | 10.5             | (3.5, 17.5)    |
| 30-44                          | 2,687           | 1,862,521   | 14.4 (13.9,15.0) | 2,671           | 1,783,584   | 15 (14.4,15.5)   | 2,550           | 1,753,846   | 14.5 (14.0,15.1) | 2,040           | 1,749,689   | 11.7 (11.2,12.2) | -2.8              | -19.2            | (-23.6, -14.8) |
| 45-64                          | 8,244           | 2,322,663   | 35.5 (34.7,36.3) | 8,187           | 2,461,341   | 33.3 (32.5,34)   | 8,165           | 2,494,736   | 32.7 (32.0,33.4) | 6,753           | 2,490,992   | 27.1 (26.5,27.8) | -8.4              | -23.6            | (-26, -21.2)   |
| 65-74                          | 3,503           | 539,915     | 64.9 (62.7,67.0) | 3,501           | 589,674     | 59.4 (57.4,61.3) | 3,628           | 676,027     | 53.7 (51.9,55.4) | 3,046           | 739,520     | 41.2 (39.7,42.7) | -23.7             | -36.5            | (-39.9, -33.1) |
| 75+                            | 5,427           | 604,153     | 89.8 (87.4,92.2) | 5,048           | 621,296     | 81.2 (79,83.5)   | 4,556           | 634,566     | 71.8 (69.7,73.9) | 3,575           | 675,978     | 52.9 (51.2,54.6) | -36.9             | -41.1            | (-43.9, -38.3) |
| <b>Sex</b>                     |                 |             |                  |                 |             |                  |                 |             |                  |                 |             |                  |                   |                  |                |
| Female                         | 9,527           | 3,426,778   | 25.9 (25.4,26.4) | 9,073           | 3,527,273   | 23.8 (23.3,24.3) | 8,572           | 3,591,661   | 22.1 (21.6,22.6) | 6,545           | 3,641,398   | 16.5 (16.1,17.0) | -9.3              | -36.1            | (-38.3, -33.9) |
| Male                           | 11,493          | 3,208,823   | 37.3 (36.7,38.0) | 11,697          | 3,253,001   | 36.4 (35.8,37.1) | 11,837          | 3,335,209   | 35.4 (34.8,36.1) | 10,215          | 3,387,708   | 29.6 (29.0,30.2) | -7.7              | -20.7            | (-22.7, -18.7) |
| <b>Race/Ethnicity</b>          |                 |             |                  |                 |             |                  |                 |             |                  |                 |             |                  |                   |                  |                |
| White, Non-Hispanic            | 5,583           | 838,203     | 74 (72.0,76)     | 5,607           | 840,695     | 70.7 (68.9,72.6) | 5,520           | 869,873     | 65.8 (64.1,67.6) | 4,819           | 886,765     | 55.5 (54.0,57.1) | -18.5             | -25.0            | (-27.9, -22.1) |
| Black, Non-Hispanic            | 2,524           | 996,973     | 34.9 (33.5,36.4) | 2,719           | 1,128,479   | 32.5 (31.2,33.8) | 2,697           | 1,225,135   | 27 (25.9,28.1)   | 2,522           | 1,307,725   | 22.8 (21.9,23.7) | -12.1             | -34.8            | (-38.9, -30.7) |
| Hispanic                       | 11,587          | 4,229,385   | 24.2 (23.8,24.7) | 11,390          | 4,131,094   | 24 (23.6,24.5)   | 11,086          | 4,087,664   | 23.2 (22.8,23.7) | 8,430           | 4,025,066   | 17.9 (17.5,18.3) | -6.3              | -25.9            | (-28, -23.8)   |
| <b>Rural/Urban<sup>d</sup></b> |                 |             |                  |                 |             |                  |                 |             |                  |                 |             |                  |                   |                  |                |
| Rural                          | -               | -           | -                | -               | -           | -                | -               | -           | -                | -               | -           | -                | -                 | -                | -              |
| Urban                          | -               | -           | -                | -               | -           | -                | -               | -           | -                | -               | -           | -                | -                 | -                | -              |
| <b>Insurance</b>               |                 |             |                  |                 |             |                  |                 |             |                  |                 |             |                  |                   |                  |                |
| Medicaid                       | 1,439           | 290,635     | 49.5 (47.0,52.1) | 1,641           | 361,594     | 45.4 (43.2,47.6) | 2,814           | 462,056     | 60.9 (58.7,63.2) | 2,858           | 584,094     | 48.9 (47.1,50.7) | -0.6              | -1.2             | (-6.5, 4.1)    |
| Medicare                       | 10,982          | 1,250,959   | 87.8 (86.2,89.4) | 10,743          | 1,311,515   | 81.9 (80.4,83.5) | 10,301          | 1,415,311   | 72.8 (71.4,74.2) | 8,068           | 1,522,964   | 53 (51.8,54.1)   | -34.8             | -39.7            | (-41.6, -37.8) |
| Private                        | 5,741           | 4,139,238   | 13.9 (13.5,14.2) | 5,389           | 4,009,016   | 13.4 (13.1,13.8) | 5,423           | 4,102,112   | 13.2 (12.9,13.6) | 4,562           | 4,249,595   | 10.7 (10.4,11.1) | -3.1              | -22.6            | (-25.5, -19.7) |
| Uninsured                      | 2,637           | 923,607     | 28.6 (27.5,29.6) | 2,808           | 1,060,003   | 26.5 (25.5,27.5) | 1,633           | 910,641     | 17.9 (17.1,18.8) | 558             | 629,971     | 8.9 (8.1,9.6)    | -19.7             | -69.0            | (-72.9, -65.1) |
| Total                          | 21,020          | 6,635,601   | 31.1 (30.7,31.6) | 20,770          | 6,780,274   | 29.6 (29.2,30.1) | 20,409          | 6,926,870   | 28.2 (27.9,28.6) | 16,760          | 7,029,106   | 22.6 (22.3,23.0) | -8.5              | -27.4            | (-28.9, -25.9) |

<sup>a</sup> Total # of Inpatient Stays N=78,959

<sup>b</sup> All rates except Age-Specific and Insurance-Specific rates are age-standardized to the 2010 US Adult Population using data from the CDC Mortality Database

<sup>c</sup> The transition from ICD-9 CM/PCS to ICD-10 CM/PCS coding occurred in third quarter of 2015. Estimates reported from years post-2015 were estimated using ICD-10 codes and may not be directly comparable to rates estimated pre-2015.

<sup>d</sup> Value of - indicates estimate was not reported. All estimates n<=10 events or RSE>=30% were not reported. Denominator estimates for rural population in New Jersey using the American Community Survey USDA-linked rural/urban variable were <10.

**Appendix 6. Table 9.** Rates of Diabetes-Specific Diabetes Inpatient Stays per 10,000 Adults in New York; Years 2008-2016

| Variable              | 2008            |                   |                         | 2011            |                   |                         | 2014            |                   |                       | 2017            |                   |                         | 2017-2008         |                  |                       |
|-----------------------|-----------------|-------------------|-------------------------|-----------------|-------------------|-------------------------|-----------------|-------------------|-----------------------|-----------------|-------------------|-------------------------|-------------------|------------------|-----------------------|
|                       | # of I.P. Stays | Denominator       | Rate (c.i.)             | # of I.P. Stays | Denominator       | Rate (c.i.)             | # of I.P. Stays | Denominator       | Rate (c.i.)           | # of I.P. Stays | Denominator       | Rate (c.i.)             | Absolute $\Delta$ | Percent $\Delta$ | (c.i.)                |
| <b>Age</b>            |                 |                   |                         |                 |                   |                         |                 |                   |                       |                 |                   |                         |                   |                  |                       |
| 18-29                 | 3,136           | 3,330,436         | 9.4 (9.1,9.8)           | 3,198           | 3,382,395         | 9.4 (9.1,9.8)           | 3,387           | 3,449,034         | 9.8 (9.5,10.2)        | 3,077           | 3,406,325         | 9 (8.7,9.4)             | -0.4              | -4.1             | (-8.2, 0)             |
| 30-44                 | 6,598           | 4,020,959         | 16.4 (16.0,16.8)        | 6,188           | 3,890,674         | 15.9 (15.5,16.3)        | 5,927           | 3,898,392         | 15.2 (14.8,15.6)      | 4,618           | 3,861,706         | 12 (11.6,12.3)          | -4.4              | -27.1            | (-29.8, -24.4)        |
| 45-64                 | 18,941          | 5,141,374         | 36.8 (36.3,37.4)        | 19,707          | 5,253,266         | 37.5 (37.0,38.0)        | 18,173          | 5,283,866         | 34.4 (33.9,34.9)      | 13,646          | 5,273,615         | 25.9 (25.4,26.3)        | -11               | -29.8            | (-31.4, -28.2)        |
| 65-74                 | 7,994           | 1,224,393         | 65.3 (63.9,66.7)        | 8,067           | 1,290,368         | 62.5 (61.2,63.9)        | 7,467           | 1,486,157         | 50.2 (49.1,51.4)      | 5,747           | 1,586,994         | 36.2 (35.3,37.2)        | -29.1             | -44.5            | (-46.7, -42.3)        |
| 75+                   | 11,971          | 1,376,299         | 87 (85.4,88.5)          | 11,291          | 1,372,131         | 82.3 (80.8,83.8)        | 9,504           | 1,410,167         | 67.4 (66.0,68.8)      | 6,588           | 1,443,619         | 45.6 (44.5,46.7)        | -41.3             | -47.5            | (-49.3, -45.7)        |
| <b>Sex</b>            |                 |                   |                         |                 |                   |                         |                 |                   |                       |                 |                   |                         |                   |                  |                       |
| Female                | 22,700          | 7,874,358         | 27.2 (26.9,27.6)        | 21,781          | 7,950,682         | 25.9 (25.5,26.2)        | 19,201          | 8,106,141         | 22.3 (22.0,22.7)      | 13,802          | 8,119,687         | 16 (15.7,16.3)          | -11.2             | -41.2            | (-42.6, -39.8)        |
| Male                  | 25,940          | 7,219,103         | 37.6 (37.1,38.1)        | 26,670          | 7,238,152         | 38.2 (37.7,38.6)        | 25,257          | 7,421,475         | 34.6 (34.2,35.0)      | 19,874          | 7,452,572         | 26.8 (26.4,27.2)        | -10.8             | -28.7            | (-30, -27.4)          |
| <b>Race/Ethnicity</b> |                 |                   |                         |                 |                   |                         |                 |                   |                       |                 |                   |                         |                   |                  |                       |
| White, Non-Hispanic   | 21,688          | 9,355,249         | 21.1 (20.8,21.4)        | 21,946          | 9,098,525         | 21.8 (21.5,22.1)        | 20,033          | 9,068,059         | 20 (19.7,20.2)        | 13,920          | 8,958,153         | 14.2 (14.0,14.5)        | -6.9              | -32.6            | (-34.1, -31.1)        |
| Black, Non-Hispanic   | 14,309          | 2,129,649         | 73.6 (72.4,74.8)        | 13,634          | 2,136,385         | 67.6 (66.5,68.8)        | 12,369          | 2,194,101         | 58.4 (57.3,59.4)      | 9,779           | 2,203,763         | 45.3 (44.4,46.2)        | -28.3             | -38.5            | (-40.2, -36.8)        |
| Hispanic              | 7,727           | 2,308,197         | 42.5 (41.5,43.4)        | 7,554           | 2,514,280         | 38.4 (37.5,39.3)        | 6,754           | 2,661,023         | 30.4 (29.6,31.1)      | 5,287           | 2,723,870         | 22.5 (21.8,23.1)        | -20               | -47.1            | (-49.4, -44.8)        |
| <b>Rural/Urban</b>    |                 |                   |                         |                 |                   |                         |                 |                   |                       |                 |                   |                         |                   |                  |                       |
| Rural                 | 3,136           | 1,243,723         | 24.6 (23.7,25.4)        | 3,371           | 1,250,394         | 25.5 (24.6,26.4)        | 2,893           | 1,235,524         | 22.1 (21.3,22.9)      | 2,333           | 1,214,296         | 18.4 (17.7,19.2)        | -6.1              | -24.9            | (-28.9, -20.9)        |
| Urban                 | 45,504          | 13,849,738        | 32.8 (32.5,33.1)        | 45,080          | 13,938,440        | 32.2 (31.9,32.5)        | 41,565          | 14,292,092        | 28.6 (28.4,28.9)      | 31,343          | 14,357,963        | 21.3 (21.1,21.6)        | -11.4             | -34.9            | (-35.9, -33.9)        |
| <b>Insurance</b>      |                 |                   |                         |                 |                   |                         |                 |                   |                       |                 |                   |                         |                   |                  |                       |
| Medicaid              | 12,027          | 1,351,364         | 89 (87.4,90.6)          | 12,398          | 1,760,708         | 70.4 (69.2,71.7)        | 12,747          | 2,043,074         | 62.4 (61.3,63.5)      | 10,553          | 2,318,372         | 45.5 (44.7,46.4)        | -43.5             | -48.9            | (-50.6, -47.2)        |
| Medicare              | 24,007          | 2,887,945         | 83.1 (82.1,84.2)        | 24,152          | 2,963,084         | 81.5 (80.5,82.5)        | 21,910          | 3,221,167         | 68 (67.1,68.9)        | 15,635          | 3,348,570         | 46.7 (46.0,47.4)        | -36.4             | -43.8            | (-45.1, -42.5)        |
| Private               | 8,984           | 8,727,751         | 10.3 (10.1,10.5)        | 9,024           | 8,288,813         | 10.9 (10.7,11.1)        | 7,744           | 8,581,836         | 9 (8.8,9.2)           | 6,007           | 8,688,671         | 6.9 (6.7,7.1)           | -3.4              | -32.8            | (-35.1, -30.5)        |
| Uninsured             | 2,993           | 2,019,786         | 14.8 (14.3,15.4)        | 2,108           | 2,061,120         | 10.2 (9.8,10.7)         | 1,409           | 1,569,929         | 9 (8.5,9.4)           | 1,019           | 1,104,604         | 9.2 (8.7,9.8)           | -5.6              | -37.7            | (-42.1, -33.3)        |
| <b>Total</b>          | <b>48,640</b>   | <b>15,093,461</b> | <b>32.1 (31.8,32.4)</b> | <b>48,451</b>   | <b>15,188,834</b> | <b>31.6 (31.3,31.8)</b> | <b>44,458</b>   | <b>15,527,616</b> | <b>28 (27.8,28.3)</b> | <b>33,676</b>   | <b>15,572,259</b> | <b>21.1 (20.8,21.3)</b> | <b>-11</b>        | <b>-34.3</b>     | <b>(-35.3, -33.3)</b> |

<sup>a</sup> Total # of Inpatient Stays N=175,225

<sup>b</sup> All rates except Age-Specific and Insurance-Specific rates are age-standardized to the 2010 US Adult Population using data from the CDC Mortality Database

<sup>c</sup> The transition from ICD-9 CM/PCS to ICD-10 CM/PCS coding occurred in third quarter of 2015. Estimates reported from years post-2015 were estimated using ICD-10 codes and may not be directly comparable to rates estimated pre-2015.

**Appendix 6. Table 10.** Rates of Diabetes-Specific Diabetes Inpatient Stays per 10,000 Adults in Utah; Years 2008-2016

| Variable              | 2008            |             |                  | 2011            |             |                  | 2014            |             |                  | 2017            |             |                  | 2017-2008         |                  |                |
|-----------------------|-----------------|-------------|------------------|-----------------|-------------|------------------|-----------------|-------------|------------------|-----------------|-------------|------------------|-------------------|------------------|----------------|
|                       | # of I.P. Stays | Denominator | Rate (c.i.)      | # of I.P. Stays | Denominator | Rate (c.i.)      | # of I.P. Stays | Denominator | Rate (c.i.)      | # of I.P. Stays | Denominator | Rate (c.i.)      | Absolute $\Delta$ | Percent $\Delta$ | (c.i.)         |
| <b>Age</b>            |                 |             |                  |                 |             |                  |                 |             |                  |                 |             |                  |                   |                  |                |
| 18-29                 | 348             | 590,462     | 5.9 (5.3,6.5)    | 448             | 545,856     | 8.2 (7.5,9.0)    | 488             | 547,583     | 8.9 (8.1,9.7)    | 581             | 586,594     | 9.9 (9.1,10.7)   | 4                 | 68.1             | (53.5, 82.7)   |
| 30-44                 | 388             | 516,453     | 7.5 (6.8,8.3)    | 470             | 567,614     | 8.3 (7.5,9.0)    | 568             | 610,255     | 9.3 (8.5,10.1)   | 608             | 640,622     | 9.5 (8.7,10.3)   | 2                 | 26.4             | (14.6, 38.2)   |
| 45-64                 | 887             | 538,738     | 16.5 (15.4,17.6) | 942             | 563,825     | 16.7 (15.6,17.8) | 954             | 585,497     | 16.3 (15.3,17.3) | 984             | 614,875     | 16 (15,17)       | -0.5              | -2.8             | (-10.3, 4.7)   |
| 65-74                 | 348             | 121,334     | 28.7 (25.7,31.7) | 366             | 130,992     | 27.9 (25.1,30.8) | 347             | 159,439     | 21.8 (19.5,24.1) | 322             | 184,712     | 17.4 (15.5,19.3) | -11.2             | -39.2            | (-49.7, -28.7) |
| 75+                   | 342             | 124,037     | 27.6 (24.7,30.5) | 367             | 127,571     | 28.8 (25.8,31.7) | 336             | 134,979     | 24.9 (22.2,27.6) | 290             | 150,203     | 19.3 (17.1,21.5) | -8.3              | -30.0            | (-41.2, -18.8) |
| <b>Sex</b>            |                 |             |                  |                 |             |                  |                 |             |                  |                 |             |                  |                   |                  |                |
| Female                | 1,064           | 952,000     | 12 (11.3,12.7)   | 1,179           | 971,560     | 12.8 (12.0,13.5) | 1,137           | 1,024,043   | 11.4 (10.7,12.1) | 1,206           | 1,092,186   | 11.2 (10.6,11.9) | -0.8              | -6.6             | (-13.4, 0.2)   |
| Male                  | 1,249           | 939,024     | 15.8 (15.0,16.8) | 1,414           | 964,298     | 16.7 (15.8,17.6) | 1,556           | 1,013,710   | 16.9 (16,17.7)   | 1,579           | 1,084,820   | 15.6 (14.9,16.4) | -0.2              | -1.3             | (-7.6, 5)      |
| <b>Race/Ethnicity</b> |                 |             |                  |                 |             |                  |                 |             |                  |                 |             |                  |                   |                  |                |
| White, Non-Hispanic   | 1,879           | 1,588,818   | 12.9 (12.3,13.5) | 2,055           | 1592695     | 13.6 (13.0,14.2) | 1,682           | 1657244     | 10.6 (10,11.1)   | 2,184           | 1,745,144   | 12.8 (12.3,13.4) | -0.1              | -0.9             | (-6.1, 4.3)    |
| Black, Non-Hispanic   | 41              | 16,936      | 27.6 (18.3,36.8) | 46              | 15819       | 48.8 (30.1,67.5) | 62              | 20701       | 34 (21.7,46.3)   | 90              | 24,066      | 40.9 (31.1,50.7) | 13.3              | 48.3             | (7.1, 89.5)    |
| Hispanic              | 265             | 193,733     | 19.9 (17.1,22.6) | 333             | 224168      | 23.3 (20.2,26.3) | 763             | 242961      | 45.6 (41.0,50.2) | 294             | 273,160     | 14 (12.2,15.8)   | -5.9              | -29.6            | (-43.6, -15.6) |
| <b>Rural/Urban</b>    |                 |             |                  |                 |             |                  |                 |             |                  |                 |             |                  |                   |                  |                |
| Rural                 | 360             | 313,916     | 11.8 (10.6,13.1) | 370             | 322,547     | 11.5 (10.3,12.7) | 330             | 272,165     | 12.2 (10.9,13.6) | 344             | 289,750     | 12 (10.8,13.3)   | 0.2               | 1.7              | (-11, 14.4)    |
| Urban                 | 1,953           | 1,577,108   | 14.3 (13.7,15.0) | 2,223           | 1,613,311   | 15.5 (14.9,16.2) | 2,363           | 1,765,588   | 14.3 (13.8,14.9) | 2,441           | 1,887,256   | 13.6 (13.0,14.1) | -0.7              | -5.1             | (-10.1, -0.1)  |
| <b>Insurance</b>      |                 |             |                  |                 |             |                  |                 |             |                  |                 |             |                  |                   |                  |                |
| Medicaid              | 347             | 61,304      | 56.7 (50.7,62.6) | 402             | 79,256      | 50.8 (45.8,55.7) | 392             | 68,354      | 57.4 (51.7,63.0) | 449             | 78,870      | 56.9 (51.6,62.2) | 0.3               | 0.5              | (-11.3, 12.3)  |
| Medicare              | 816             | 272,464     | 30 (27.9,32.0)   | 1,002           | 286,559     | 35 (32.8,37.1)   | 1,056           | 329,176     | 32.1 (30.2,34.0) | 949             | 362,242     | 26.2 (24.5,27.9) | -3.8              | -12.6            | (-20, -5.2)    |
| Private               | 812             | 1,233,040   | 6.6 (6.1,7.0)    | 733             | 1,213,744   | 6 (5.6,6.5)      | 803             | 1,323,294   | 6.1 (5.7,6.5)    | 913             | 1,480,402   | 6.2 (5.8,6.6)    | -0.4              | -6.4             | (-14, 1.2)     |
| Uninsured             | 227             | 296,240     | 7.7 (6.7,8.7)    | 312             | 331,214     | 9.4 (8.4,10.5)   | 327             | 285,740     | 11.4 (10.2,12.7) | 367             | 223,794     | 16.4 (14.7,18.1) | 8.7               | 113.8            | (92.3, 135.3)  |
| Total                 | 2,313           | 1,891,024   | 13.8 (13.2,14.4) | 2,593           | 1,935,858   | 14.6 (14.1,15.2) | 2,693           | 2,037,753   | 14 (13.5,14.6)   | 2,785           | 2,177,006   | 13.4 (12.9,13.9) | -0.5              | -3.3             | (-8, 1.4)      |

<sup>a</sup> Total # of Inpatient Stays N=10,384

<sup>b</sup> All rates except Age-Specific and Insurance-Specific rates are age-standardized to the 2010 US Adult Population using data from the CDC Mortality Database

<sup>c</sup> The transition from ICD-9 CM/PCS to ICD-10 CM/PCS coding occurred in third quarter of 2015. Estimates reported from years post-2015 were estimated using ICD-10 codes and may not be directly comparable to rates estimated pre-2015.

**Appendix 6. Table 11. Rates of Diabetes-Specific Diabetes Inpatient Stays per 10,000 Adults in Vermont; Years 2008-2017**

| Variable                          | 2008            |             |      |             | 2011            |             |      |             | 2014            |             |             |                 | 2017        |             |      |             | 2017-2008         |                  |                |
|-----------------------------------|-----------------|-------------|------|-------------|-----------------|-------------|------|-------------|-----------------|-------------|-------------|-----------------|-------------|-------------|------|-------------|-------------------|------------------|----------------|
|                                   | # of I.P. Stays | Denominator | Rate | (c.i.)      | # of I.P. Stays | Denominator | Rate | (c.i.)      | # of I.P. Stays | Denominator | Rate (c.i.) | # of I.P. Stays | Denominator | Rate (c.i.) |      |             | Absolute $\Delta$ | Percent $\Delta$ | (c.i.)         |
| <b>Age</b>                        |                 |             |      |             |                 |             |      |             |                 |             |             |                 |             |             |      |             |                   |                  |                |
| 18-29                             | 86              | 99,268      | 8.7  | (6.8,10.5)  | 101             | 99,277      | 10.2 | (8.2,12.2)  | 99              | 101,792     | 9.7         | (7.8,11.6)      | 89          | 102,030     | 8.7  | (6.9,10.5)  | 0.1               | 0.7              | (-24.2, 25.6)  |
| 30-44                             | 119             | 115,418     | 10.3 | (8.5,12.2)  | 106             | 112,475     | 9.4  | (7.6,11.2)  | 114             | 110,046     | 10.4        | (8.5,12.3)      | 101         | 106,355     | 9.5  | (7.6,11.4)  | -1                | -7.9             | (-29.3, 13.5)  |
| 45-64                             | 288             | 191,266     | 15.1 | (13.3,16.8) | 291             | 193,415     | 15.1 | (13.3,16.8) | 351             | 186,455     | 18.8        | (16.9,20.8)     | 221         | 182,085     | 12.1 | (10.5,13.7) | -2.9              | -19.4            | (-32.7, -6.1)  |
| 65-74                             | 117             | 44,410      | 26.4 | (21.6,31.1) | 108             | 47,543      | 22.7 | (18.4,27)   | 159             | 58,175      | 27.3        | (23.1,31.6)     | 101         | 63,713      | 15.8 | (12.8,18.9) | -10.5             | -39.8            | (-58, -21.6)   |
| 75+                               | 161             | 42,854      | 37.6 | (31.8,43.4) | 173             | 46,933      | 36.9 | (31.4,42.4) | 138             | 48,020      | 28.7        | (24.0,33.5)     | 106         | 50,412      | 21   | (17.0,25.0) | -16.5             | -44.0            | (-59.8, -28.2) |
| <b>Sex</b>                        |                 |             |      |             |                 |             |      |             |                 |             |             |                 |             |             |      |             |                   |                  |                |
| Female                            | 367             | 254,338     | 13.9 | (12.5,15.3) | 362             | 254,641     | 13.6 | (12.2,15.0) | 359             | 260,641     | 13.3        | (11.9,14.7)     | 251         | 259,493     | 9.3  | (8.1,10.5)  | -4.6              | -33.2            | (-44.4, -22)   |
| Male                              | 404             | 238,878     | 16.9 | (15.2,18.5) | 417             | 245,002     | 16.5 | (14.9,18.1) | 502             | 243,847     | 19.4        | (17.7,21.1)     | 367         | 245,102     | 14.4 | (12.9,15.9) | -2.5              | -14.6            | (-25.7, -3.5)  |
| <b>Race/Ethnicity<sup>d</sup></b> |                 |             |      |             |                 |             |      |             |                 |             |             |                 |             |             |      |             |                   |                  |                |
| White, Non-Hispanic               | -               | -           | -    | -           | -               | -           | -    | -           | -               | -           | -           | -               | -           | -           | -    | -           | -                 | -                | -              |
| Black, Non-Hispanic               | -               | -           | -    | -           | -               | -           | -    | -           | -               | -           | -           | -               | -           | -           | -    | -           | -                 | -                | -              |
| Hispanic                          | -               | -           | -    | -           | -               | -           | -    | -           | -               | -           | -           | -               | -           | -           | -    | -           | -                 | -                | -              |
| <b>Rural/Urban</b>                |                 |             |      |             |                 |             |      |             |                 |             |             |                 |             |             |      |             |                   |                  |                |
| Rural                             | 541             | 331,730     | 15.6 | (14.3,17.0) | 568             | 329,683     | 16.2 | (14.8,17.5) | 583             | 330,868     | 16.4        | (15.0,17.7)     | 408         | 330,050     | 11.9 | (10.7,13.0) | -3.8              | -24.2            | (-33.8, -14.6) |
| Urban                             | 230             | 161,486     | 14.7 | (12.8,16.6) | 211             | 169,960     | 12.8 | (11.0,14.5) | 278             | 173,620     | 16.1        | (14.2,18.0)     | 210         | 174,545     | 11.9 | (10.3,13.5) | -2.8              | -19.1            | (-33.4, -4.8)  |
| <b>Insurance</b>                  |                 |             |      |             |                 |             |      |             |                 |             |             |                 |             |             |      |             |                   |                  |                |
| Medicaid                          | 154             | 45,815      | 33.6 | (28.3,38.9) | 175             | 56,954      | 30.7 | (26.2,35.3) | 197             | 65,776      | 29.9        | (25.7,34.2)     | 171         | 69,271      | 24.6 | (20.9,28.4) | -9                | -26.7            | (-42.9, -10.5) |
| Medicare                          | 372             | 102,640     | 36.2 | (32.6,40.0) | 397             | 106,997     | 37.1 | (33.4,40.7) | 461             | 124,297     | 37.1        | (33.7,40.5)     | 302         | 128,549     | 23.5 | (20.9,26.2) | -12.7             | -35.1            | (-45.7, -24.5) |
| Private                           | 206             | 291,962     | 7.1  | (6.1,8.0)   | 176             | 286,474     | 6.2  | (5.2,7.1)   | 177             | 281,172     | 6.3         | (5.4,7.3)       | 128         | 280,782     | 4.6  | (3.8,5.4)   | -2.5              | -35.3            | (-50.2, -20.4) |
| Uninsured                         | 36              | 47,088      | 7.7  | (5.2,10.1)  | 25              | 42,758      | 5.9  | (3.6,8.2)   | 18              | 28,058      | 6.4         | (3.5,9.4)       | 13          | 20,787      | 6.2  | (2.9,9.7)   | -1.4              | -18.3            | (-64.6, 28)    |
| Total                             | 771             | 493,216     | 15.2 | (14.2,16.3) | 779             | 499,643     | 14.9 | (13.9,16)   | 861             | 504,488     | 16.2        | (15.1,17.3)     | 618         | 504,595     | 11.7 | (10.8,12.7) | -3.5              | -23.0            | (-30.9, -15.1) |

<sup>a</sup> Total # of Inpatient Stays N=3,029

<sup>b</sup> All rates except Age-Specific and Insurance-Specific rates are age-standardized to the 2010 US Adult Population using data from the CDC Mortality Database

<sup>c</sup> The transition from ICD-9 CM/PCS to ICD-10 CM/PCS coding occurred in third quarter of 2015. Estimates reported from years post-2015 were estimated using ICD-10 codes and may not be directly comparable to rates estimated pre-2015.

<sup>d</sup> Value of - indicates estimate was not reported. All estimates n<=10 events or RSE>=30% were not reported. Race-specific estimates generated using Vermont data had relative standard errors >=30% for Black and Hispanic populations. As such, race/ethnicity specific estimates were not reported.

**Appendix 6. Table 12.** Average Rates of Diabetes-Specific Inpatient Stays from Pooled State Data by Race, Rural/Urban, and Insurance; Years 2008-2017

|                     | 2008             | 2011             | 2014             | 2016 / 2017*     |
|---------------------|------------------|------------------|------------------|------------------|
|                     | Rate (95% CI)    | Rate (95% CI)    | Rate (95% CI)    | Rate (95% CI)    |
| Race                |                  |                  |                  |                  |
| Black, non-Hispanic | 68.3 (67.4,69.1) | 65 (64.4,65.6)   | 59.2 (58.6,59.7) | 50.3 (49.9,50.8) |
| Hispanic            | 37.7 (37,38.5)   | 29.5 (29.1,30)   | 27.4 (27.1,27.8) | 21.9 (21.6,22.2) |
| White, non-Hispanic | 22.6 (22.4,22.8) | 23.9 (23.7,24)   | 23.7 (23.6,23.9) | 20.1 (20,20.2)   |
| Rural/Urban         |                  |                  |                  |                  |
| Rural               | 27.8 (27.4,28.1) | 29.8 (29.4,30.1) | 27.2 (26.8,27.5) | 23.6 (23.3,23.9) |
| Urban               | 28.9 (28.7,29)   | 30.2 (30,30.3)   | 29.7 (29.6,29.9) | 24.9 (24.8,25.1) |
| Insurance           |                  |                  |                  |                  |
| Medicaid            | 89.4 (88.4,90.4) | 79.1 (78.3,79.9) | 74.2 (73.5,74.9) | 60.5 (59.9,61.1) |
| Medicare            | 70.3 (69.8,70.7) | 71 (70.5,71.4)   | 63.4 (63,63.8)   | 48 (47.8,48.5)   |
| Private             | 11.4 (11.3,11.5) | 11.5 (11.4,11.6) | 11.1 (11,11.2)   | 9.4 (9.3,9.5)    |
| Uninsured           | 17 (16.7,17.2)   | 17.3 (17.1,17.6) | 17.4 (17.1,17.6) | 19 (18.6,19.3)   |

Rates were generated using average inpatient stays aggregated from pooled SID data from states AZ, FL, IA, KY, MD, NC, NE, NJ, NY, UT, VT.

Population estimates generated from pooled state populations estimated from the IPUMS USA American Community Survey for corresponding years.

All rates except insurance were age-standardized to the 2010 US Adult Population using population estimates available from the CDC Mortality

\*Average rates calculated from an average ED utilization rates from 2016 and 2017 estimates, as 2017 data was not available for select states.

\*\*Average use across states for Race estimates do not include NE and VT due to missing race variable and low n of numerator and denominator

\*\*Average use across states for Rural/Urban estimates do not include NJ due to lack of rural counties as defined by USDA supplied rural/urban



## Appendix 7. State-Specific All-Cause Diabetes Hospitalization Rates by Race/Ethnicity, Rural/Urban, and Insurance

**Appendix 7. Figure 1.** Age-Adjusted Rates of All-Cause Hospitalizations among US Adults by Sex; Years 2008-2017

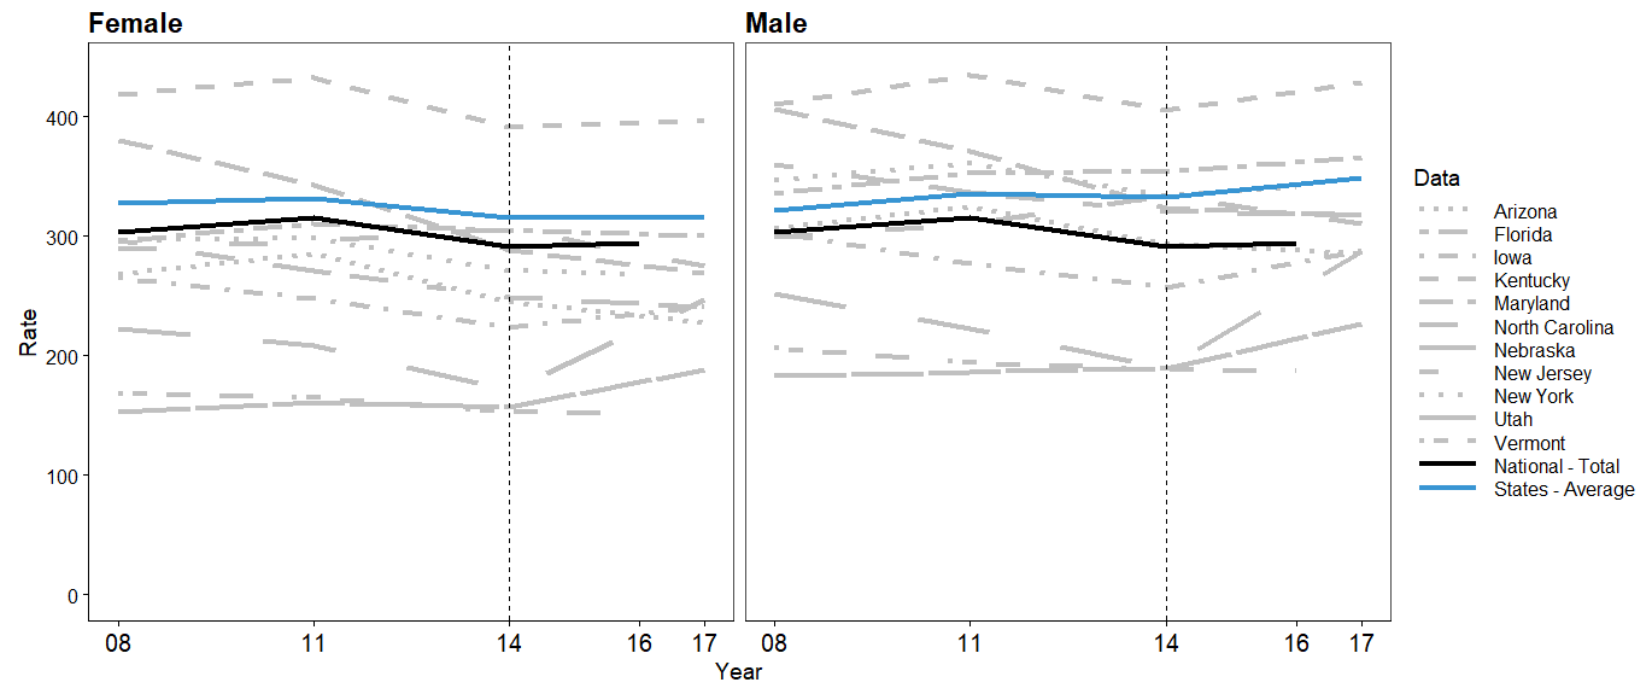

Hospitalization rates were calculated using numerator data from the HEALTHCARE COST AND UTILIZATION PROJECT Nationwide Inpatient Sample and State Inpatient Databases and denominator data from the IPUMS USA American Community Survey from years 2008-2017. All rates are age-standardized to the national 2010 US adult population using data from the CDC Mortality Database.

Two benchmark lines are highlighted: the black National-Total line shows national hospitalization rates across all US adults, regardless of sex and the blue 11 States-Average line shows average hospitalization rates across all states by sex.

The dotted vertical line delineates the point within our data that the data transitioned from rates generated using ICD-9 codes to ICD-10 codes. Rates post-transition may not be directly comparable to rates prior to the transition.

**Appendix 7. Figure 2.** Age-Adjusted Rates of All-Cause Hospitalizations among US Adults by Race/Ethnicity; Years 2008-2017

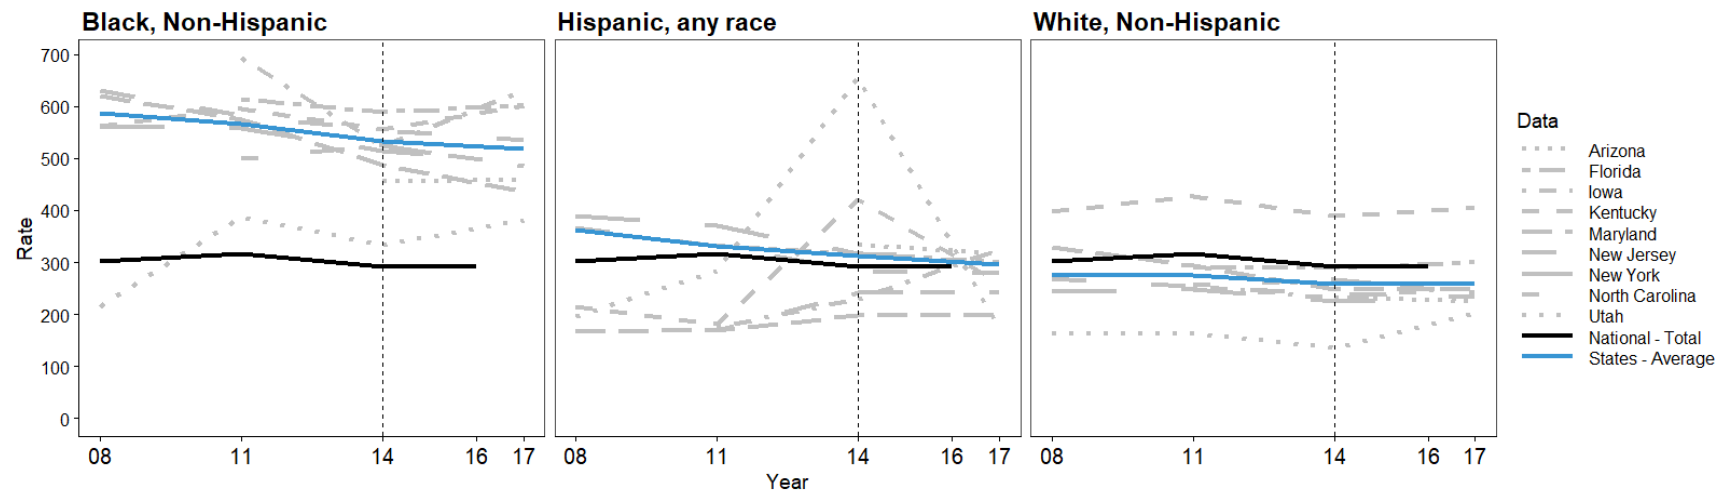

Hospitalization rates were calculated using numerator data from the HEALTHCARE COST AND UTILIZATION PROJECT Nationwide Inpatient Sample and State Inpatient Databases and denominator data from the IPUMS USA American Community Survey from years 2008-2017. All rates are age-standardized to the national 2010 US adult population using data from the CDC Mortality Database.

Two benchmark lines are highlighted: the black National-Total line shows national hospitalization rates across all US adults, regardless of race/ethnicity and the blue 11 States-Average line shows average hospitalization rates across all states by race/ethnicity.

Rates were not reported for state data with inconsistently coded race/ethnicity variables and/or sub-group estimates with estimates  $n \leq 10$  events or  $RSE \geq 30\%$ . Nevada did not supply race/ethnicity data.

The dotted vertical line delineates the point within our data that the data transitioned from rates generated using ICD-9 codes to ICD-10 codes. Rates post-transition may not be directly comparable to rates prior to the transition.

**Appendix 7. Figure 3.** Age-Adjusted Rates of All-Cause Hospitalizations among US adults by Rural Status; Years 2008-2017

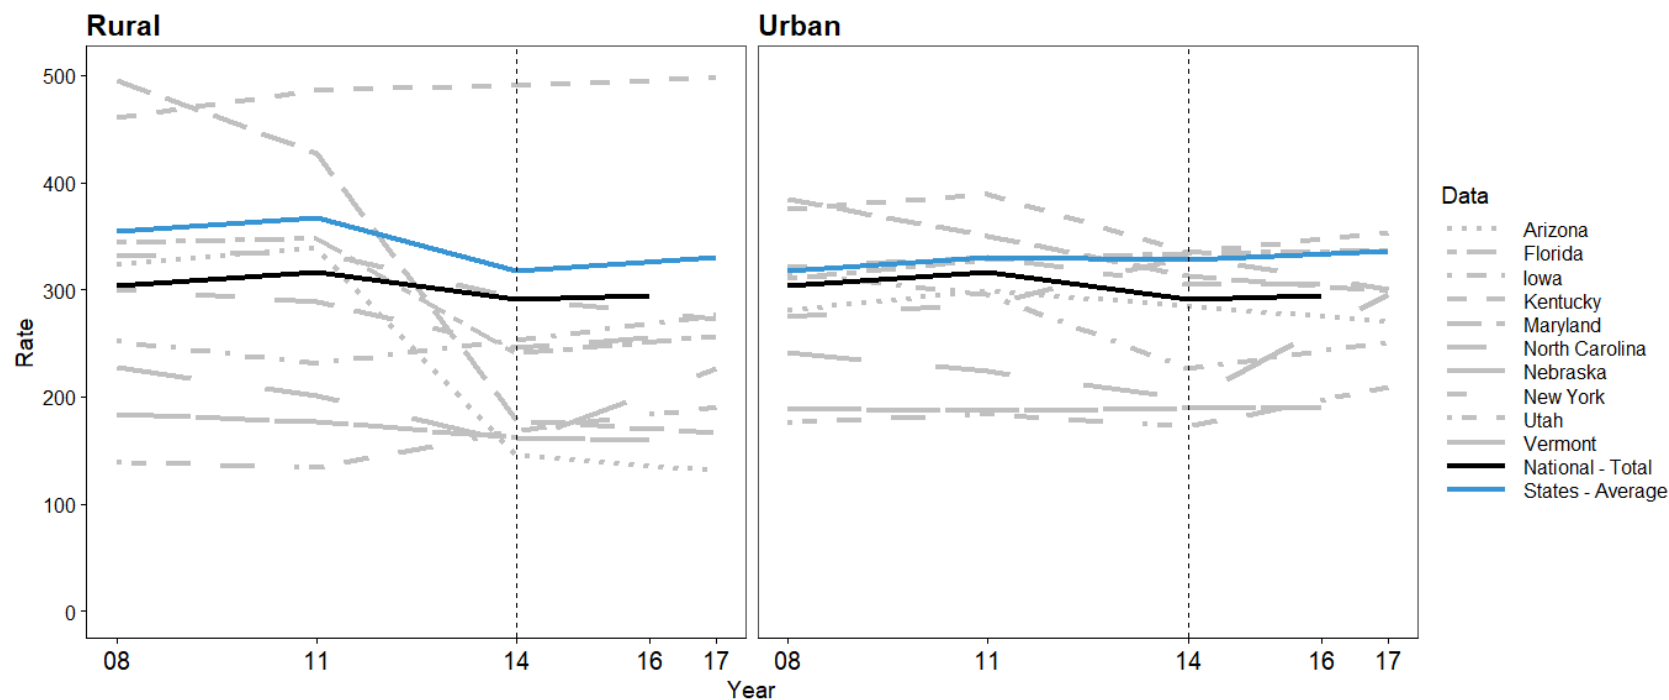

Hospitalization rates were calculated using numerator data from the HEALTHCARE COST AND UTILIZATION PROJECT Nationwide Inpatient Sample and State Inpatient Databases and denominator data from the IPUMS USA American Community Survey from years 2008-2017. All rates are age-standardized to the national 2010 US adult population using data from the CDC Mortality Database.

Two benchmark lines are highlighted: the black National-Total line shows national hospitalization rates across all US adults, regardless of rural/urban status and the blue 11 States-Average line shows average hospitalization rates across all states by rural/urban status.

Rates were not reported for state data with sub-group estimates with  $n \leq 10$  events or  $RSE > 30\%$ . The USDA-linked Rural/Urban variable did not allocate any rural counties in New Jersey.

The dotted vertical line delineates the point within our data that the data transitioned from rates generated using ICD-9 codes to ICD-10 codes. Rates post-transition may not be directly comparable to rates prior to the transition.

**Appendix 7. Figure 4.** Insurance-Specific Rates of All-Cause Hospitalizations among US adults; Years 2008-2017

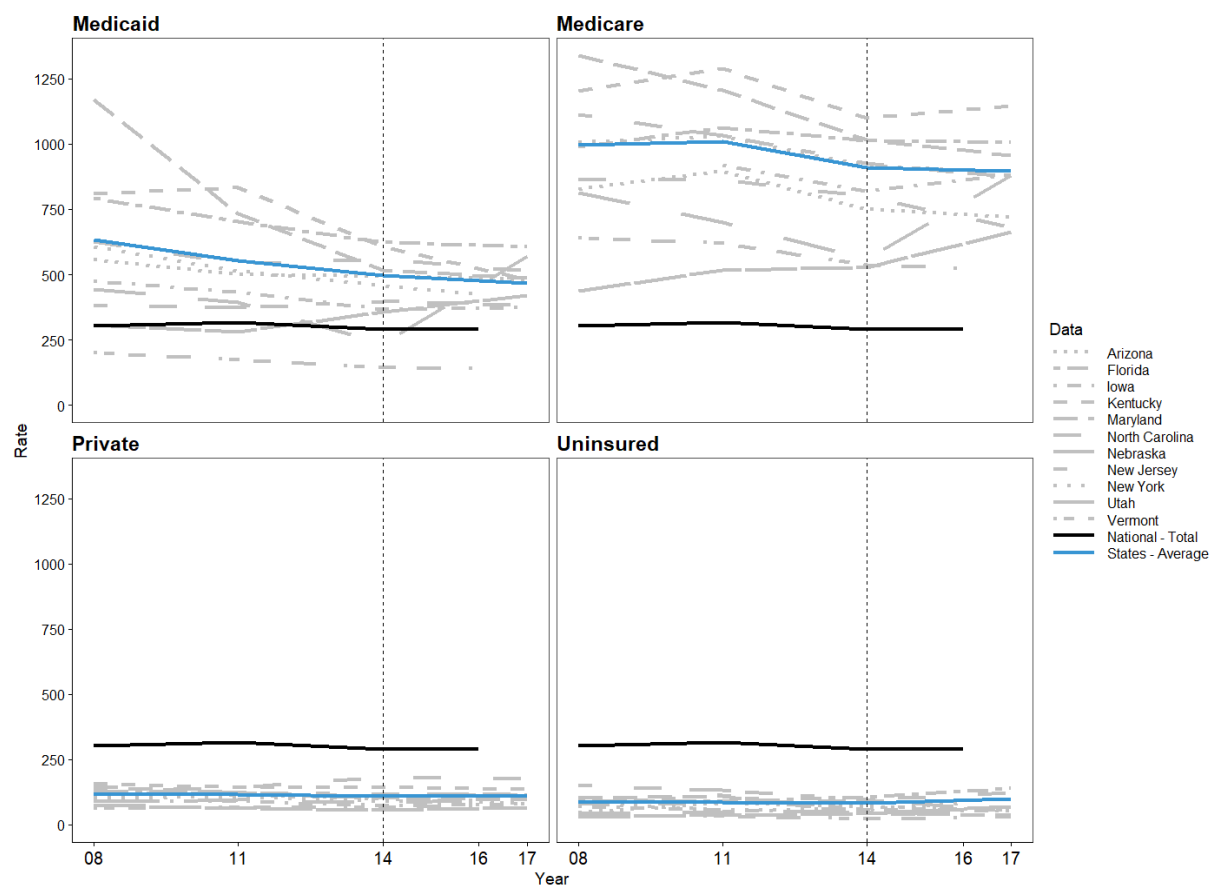

Hospitalization rates were calculated using numerator data from the HEALTHCARE COST AND UTILIZATION PROJECT Nationwide Inpatient Sample and State Inpatient Databases and denominator data from the IPUMS USA American Community Survey from years 2008-2017. All rates are age-standardized to the national 2010 US adult population using data from the CDC Mortality Database.

Two benchmark lines are highlighted: the black National-Total line shows national hospitalization rates across all US adults, regardless of insurance status and the blue 11 States-Average line shows average hospitalization rates across all states by insurance.

The dotted vertical line delineates the point within our data that the data transitioned from rates generated using ICD-9 codes to ICD-10 codes. Rates post-transition may not be directly comparable to rates prior to the transition.

## Appendix 8. State-Specific Diabetes-Related Hospitalization Rates by Sex, Rural/Urban, and Insurance

### Appendix 8, Figure 1. Age-Adjusted Rates of Diabetes-Specific Hospitalizations among US Adults by Sex; Years 2008-2017

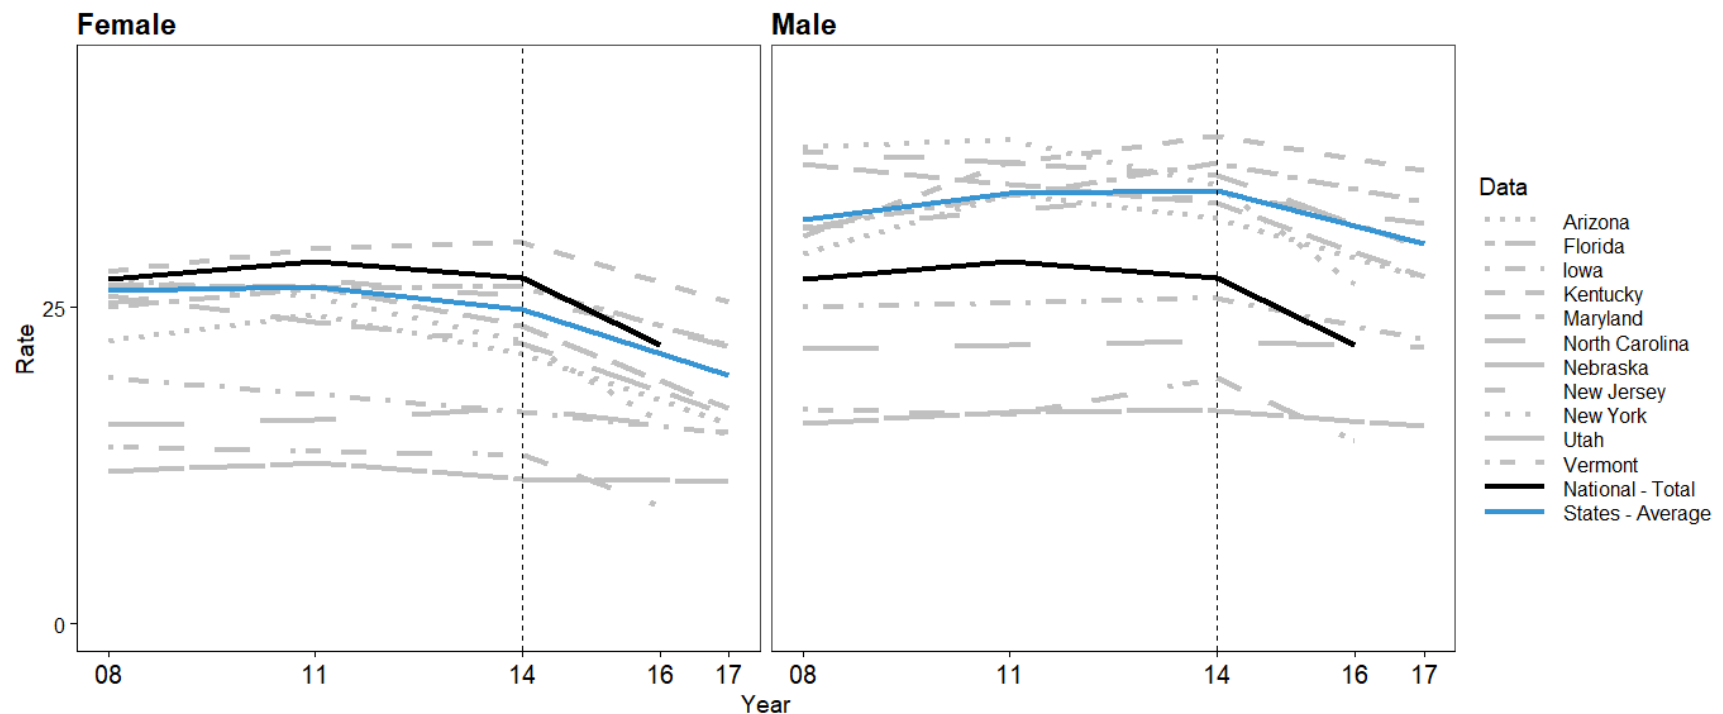

Hospitalization rates were calculated using numerator data from the HEALTHCARE COST AND UTILIZATION PROJECT Nationwide Inpatient Sample and State Inpatient Databases and denominator data from the IPUMS USA American Community Survey from years 2008-2017. All rates are age-standardized to the national 2010 US adult population using data from the CDC Mortality Database.

Two benchmark lines are highlighted: the black National-Total line shows national hospitalization rates across all US adults, regardless of sex and the blue 11 States-Average line shows average hospitalization rates across all states by sex.

The dotted vertical line delineates the point within our data that the data transitioned from rates generated using ICD-9 codes to ICD-10 codes. Rates post-transition may not be directly comparable to rates prior to the transition.

**Appendix 8, Figure 2.** Age-Adjusted Rates of Diabetes-Specific Hospitalizations among US adults by Rural Status; Years 2008-2017

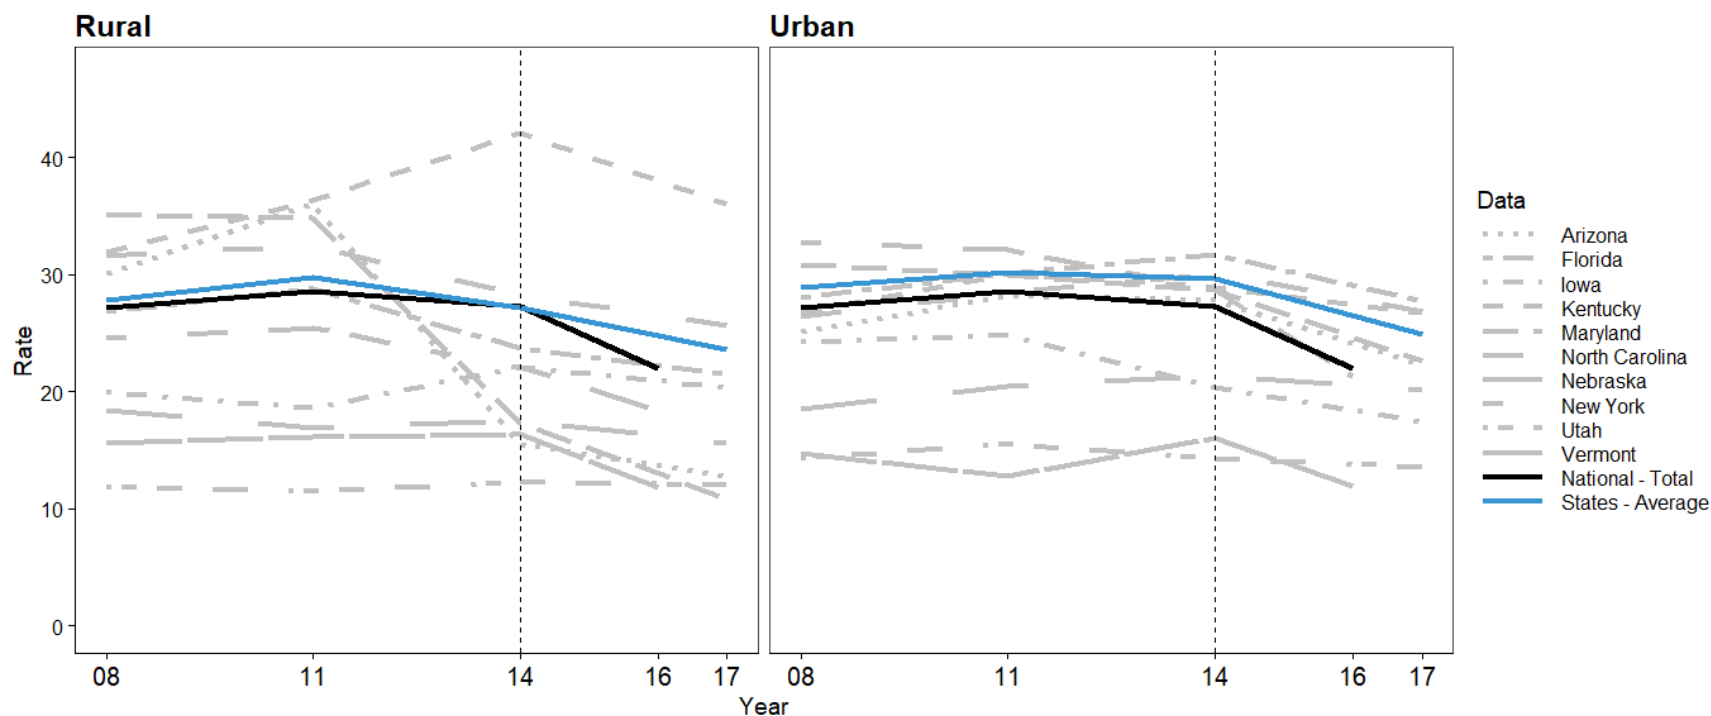

Hospitalization rates were calculated using numerator data from the HEALTHCARE COST AND UTILIZATION PROJECT Nationwide Inpatient Sample and State Inpatient Databases and denominator data from the IPUMS USA American Community Survey from years 2008-2017. All rates are age-standardized to the national 2010 US adult population using data from the CDC Mortality Database.

Two benchmark lines are highlighted: the black National-Total line shows national hospitalization rates across all US adults, regardless of rural/urban status and the blue 11 States-Average line shows average hospitalization rates across all states by rural/urban status.

Rates were not reported for state data with sub-group estimates with  $n \leq 10$  events or  $RSE > 30\%$ . The USDA-linked Rural/Urban variable did not allocate any rural counties in New Jersey.

The dotted vertical line delineates the point within our data that the data transitioned from rates generated using ICD-9 codes to ICD-10 codes. Rates post-transition may not be directly comparable to rates prior to the transition.

### **Appendix 8, Figure 3. Insurance-Specific Rates of All-Cause Hospitalizations among US adults; Years 2008-2017**

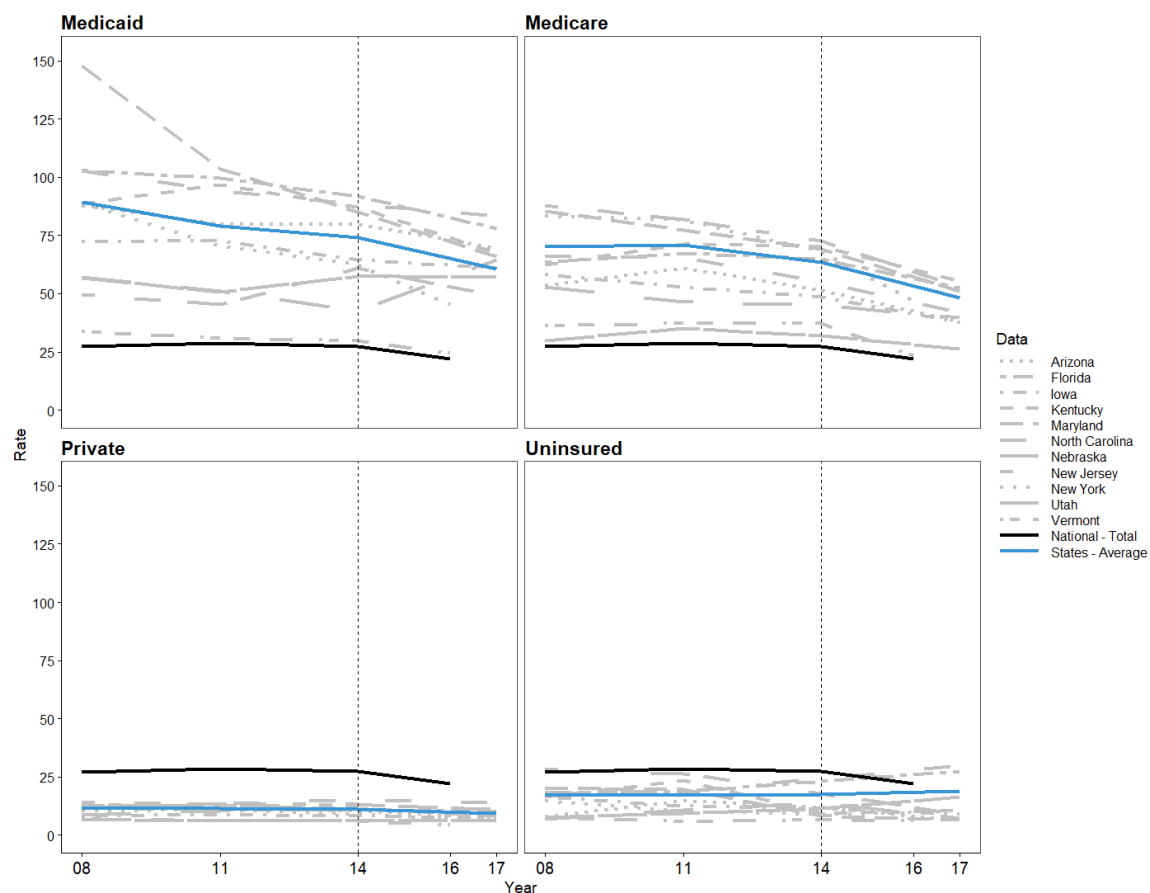

Hospitalization rates were calculated using numerator data from the HEALTHCARE COST AND UTILIZATION PROJECT Nationwide Inpatient Sample and State Inpatient Databases and denominator data from the IPUMS USA American Community Survey from years 2008-2017. All rates are age-standardized to the national 2010 US adult population using data from the CDC Mortality Database.

Two benchmark lines are highlighted: the black National-Total line shows national hospitalization rates across all US adults, regardless of insurance status and

the blue 11 States-Average line shows average hospitalization rates across all states by insurance.

The dotted vertical line delineates the point within our data that the data transitioned from rates generated using ICD-9 codes to ICD-10 codes. Rates post-transition may not be directly comparable to rates prior to the transition.

## Appendix 9. Sensitivity Analyses of Unavailable Data for State-Specific All-Cause Diabetes and Diabetes-Specific Hospitalization Rates by Race/Ethnicity

**Appendix 9. Figure 1.** Age-Adjusted Rates of All-Cause Diabetes Hospitalizations among US Adults by Race/Ethnicity; Sensitivity Analysis, Complete Race/Ethnicity Data for All Years 2008-2017

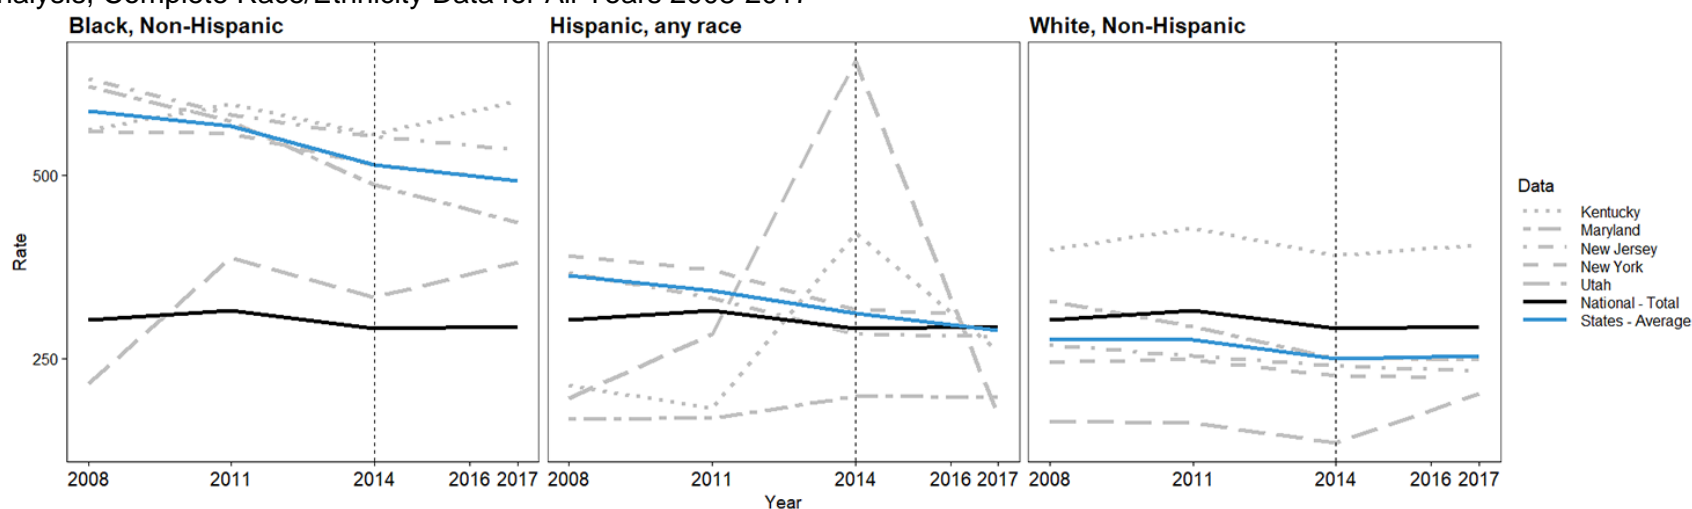

Hospitalization rates were calculated using numerator data from the HCUP Nationwide Inpatient Sample and State Inpatient Databases and denominator data from the IPUMS USA American Community Survey from years 2008-2017. All rates are age-standardized to the national 2010 US adult population using data from the CDC Mortality Database.

Two benchmark lines are highlighted: the black National-Total line shows national hospitalization rates across all US adults, regardless of race/ethnicity and the blue 11 States-Average line shows average hospitalization rates across all states by race/ethnicity.

Rates were not reported for state data with inconsistently coded race/ethnicity variables and/or sub-group estimates with estimates  $n \leq 10$  events or  $RSE \geq 30\%$ . Nevada did not supply race/ethnicity data.

The dotted vertical line delineates the point within our data that the data transitioned from rates generated using ICD-9 codes to ICD-10 codes. Rates post-transition may not be directly comparable to rates prior to the transition.



**Appendix 9. Figure 2.** Age-Adjusted Rates of All-Cause Diabetes Hospitalizations among US Adults by Race/Ethnicity; Sensitivity Analysis, Complete Race/Ethnicity Data for at least 3 Years 2008-2017

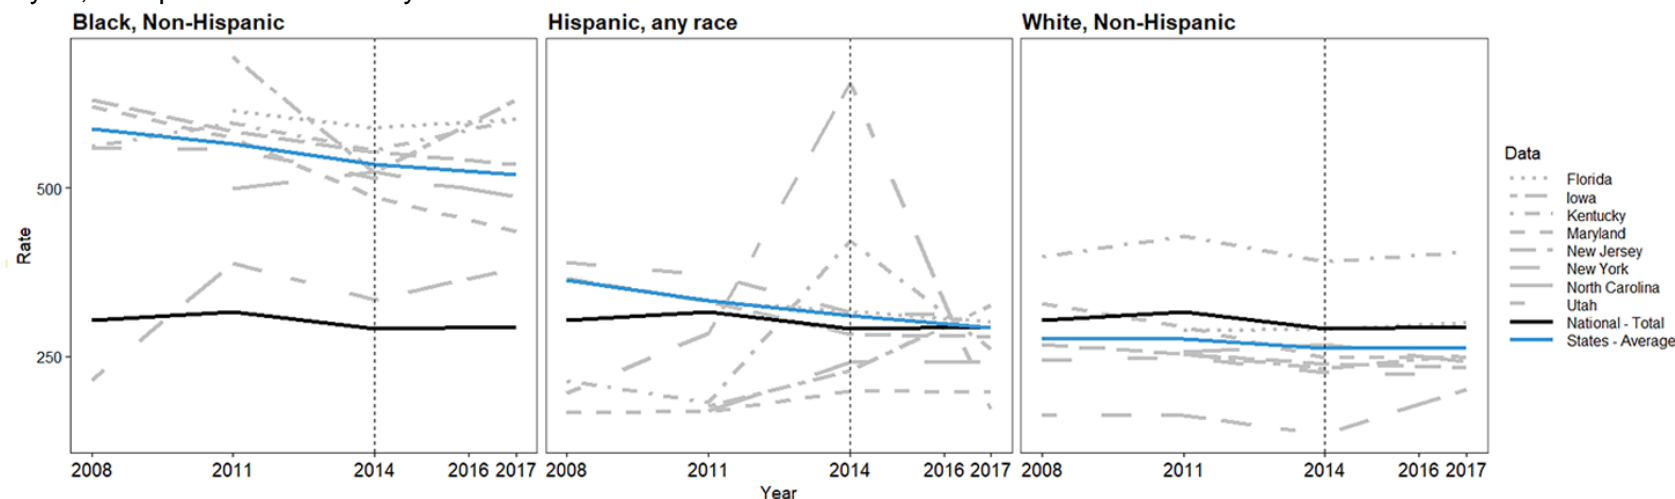

Hospitalization rates were calculated using numerator data from the HCUP Nationwide Inpatient Sample and State Inpatient Databases and denominator data from the IPUMS USA American Community Survey from years 2008-2017. All rates are age-standardized to the national 2010 US adult population using data from the CDC Mortality Database.

Two benchmark lines are highlighted: the black National-Total line shows national hospitalization rates across all US adults, regardless of race/ethnicity and the blue 11 States-Average line shows average hospitalization rates across all states by race/ethnicity.

Rates were not reported for state data with inconsistently coded race/ethnicity variables and/or sub-group estimates with estimates  $n \leq 10$  events or  $RSE \geq 30\%$ . Nevada did not supply race/ethnicity data.

The dotted vertical line delineates the point within our data that the data transitioned from rates generated using ICD-9 codes to ICD-10 codes. Rates post-transition may not be directly comparable to rates prior to the transition.

**Appendix 9. Figure 3.** Age-Adjusted Rates of Diabetes-Specific Hospitalizations among US Adults by Race/Ethnicity; Sensitivity Analysis, Complete Race/Ethnicity Data for all Years, 2008-2017

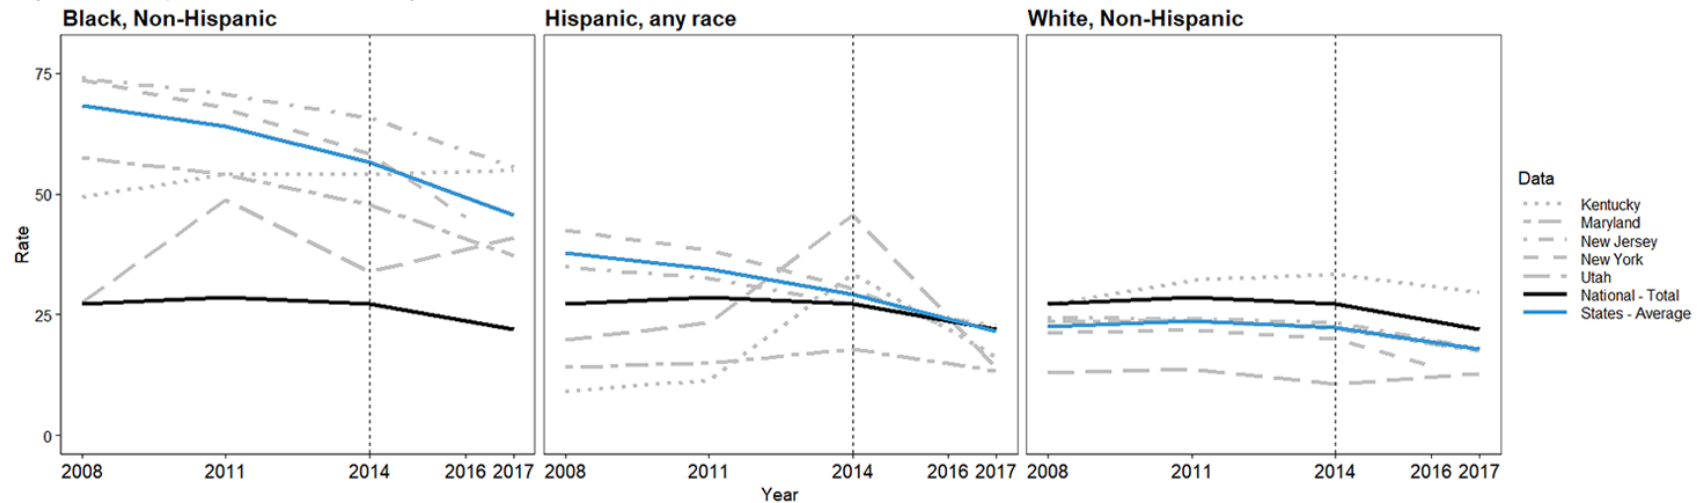

Hospitalization rates were calculated using numerator data from the HCUP Nationwide Inpatient Sample and State Inpatient Databases and denominator data from the IPUMS USA American Community Survey from years 2008-2017. All rates are age-standardized to the national 2010 US adult population using data from the CDC Mortality Database.

Two benchmark lines are highlighted: the black National-Total line shows national hospitalization rates across all US adults, regardless of race/ethnicity and the blue 11 States-Average line shows average hospitalization rates across all states by race/ethnicity.

Rates were not reported for state data with inconsistently coded race/ethnicity variables and/or sub-group estimates with estimates  $n \leq 10$  events or  $RSE \geq 30\%$ . Nevada did not supply race/ethnicity data.

The dotted vertical line delineates the point within our data that the data transitioned from rates generated using ICD-9 codes to ICD-10 codes. Rates post-transition may not be directly comparable to rates prior to the transition.

**Appendix 8. Figure 4.** Age-Adjusted Rates of Diabetes-Specific Hospitalizations among US Adults by Race/Ethnicity; Sensitivity Analysis, Complete Race/Ethnicity Data for at least 3 Years, 2008-2017

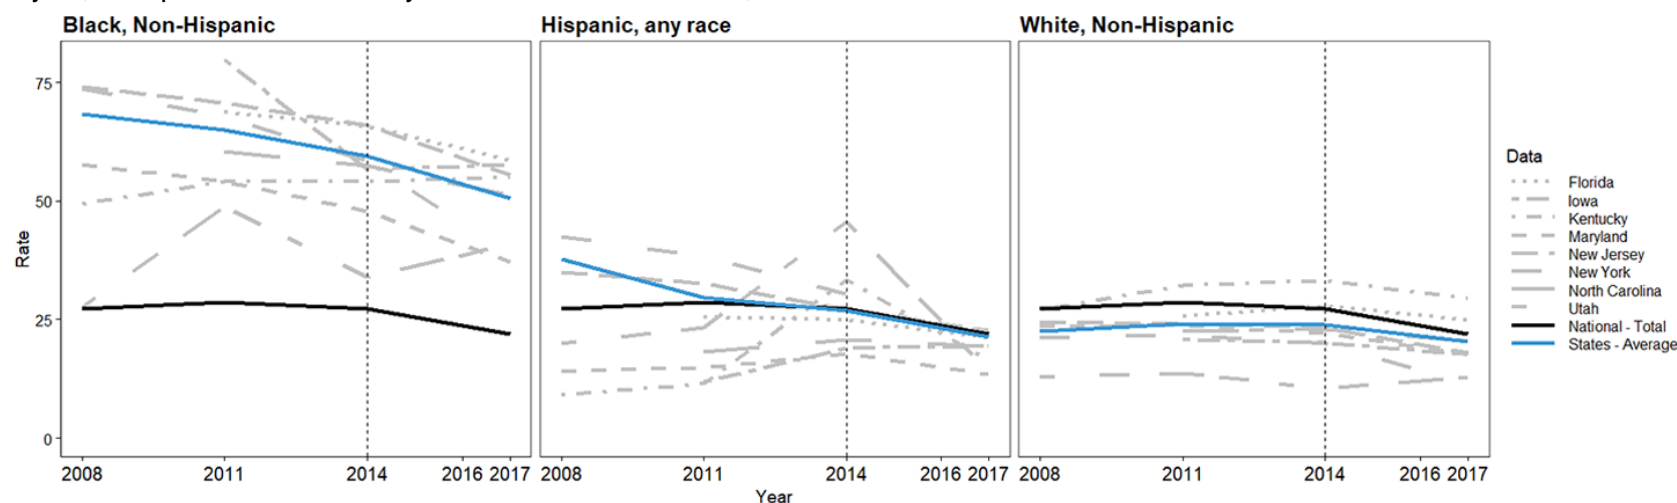

Hospitalization rates were calculated using numerator data from the HCUP Nationwide Inpatient Sample and State Inpatient Databases and denominator data from the IPUMS USA American Community Survey from years 2008-2017. All rates are age-standardized to the national 2010 US adult population using data from the CDC Mortality Database.

Two benchmark lines are highlighted: the black National-Total line shows national hospitalization rates across all US adults, regardless of race/ethnicity and the blue 11 States-Average line shows average hospitalization rates across all states by race/ethnicity.

Rates were not reported for state data with inconsistently coded race/ethnicity variables and/or sub-group estimates with estimates  $n \leq 10$  events or  $RSE \geq 30\%$ . Nevada did not supply race/ethnicity data.

The dotted vertical line delineates the point within our data that the data transitioned from rates generated using ICD-9 codes to ICD-10 codes. Rates post-transition may not be directly comparable to rates prior to the transition.

## REFERENCES

1. Agency For Healthcare Research and Quality (AHRQ). Prevention Quality Indicators. AHRQ - Quality Indicators Web site. [https://www.qualityindicators.ahrq.gov/Modules/PQI\\_TechSpec\\_ICD10\\_v2020.aspx](https://www.qualityindicators.ahrq.gov/Modules/PQI_TechSpec_ICD10_v2020.aspx). Published 2020. Accessed 2020, January.
2. Tseng C-L, Soroka O, Pogach LM. An expanded prevention quality diabetes composite: Quantifying the burden of preventable hospitalizations for older adults with diabetes. *Journal of Diabetes and its Complications*. 2018;32(5):458-464.
3. Harding JL, Andes LJ, Rolka DB, et al. National and State-Level Trends in Nontraumatic Lower-Extremity Amputation Among U.S. Medicare Beneficiaries With Diabetes, 2000-2017. *Diabetes Care*. 2020;43(10):2453-2459.
4. Kowarik A, Templ M. Imputation with the R Package VIM. *Journal of Statistical Software*. 2016;74(7):1-16.
5. Ma Y, Zhang W, Lyman S, Huang Y. The HCUP SID imputation project: improving statistical inferences for health disparities research by imputing missing race data. *Health services research*. 2018;53(3):1870-1889.
6. Molenberghs G, Verbeke G. *Linear mixed models for longitudinal data*. Springer; 2000.
7. Gelman A, Hill J. *Data analysis using regression and multilevel/hierarchical models*. Cambridge university press; 2006.
8. Little RJ, Rubin DB. *Statistical analysis with missing data*. Vol 793: John Wiley & Sons; 2019.
9. Buuren Sv, Groothuis-Oudshoorn K. Mice: Multivariate imputation by chained equations in R J Stat. Softw. 45. In:2011.
10. Centers for Medicare & Medicaid Services (CMS). Medicare & Other Health Benefits: Your Guide to Who Pays First. U.S. DEPARTMENT OF HEALTH AND HUMAN SERVICES. <https://www.medicare.gov/Pubs/pdf/02179-medicare-coordination-benefits-payer.pdf>. Published 2020. Accessed 2020, August.
11. Barrett M, Lopez-Gonzalez L, Hines A, Andrews R, Jiang J. *An Examination of Expected Payer Coding in HCUP Databases*. U.S. Agency for Healthcare Research and Quality; 2014/12/17/ 2014. 2014-03.
12. Economic Research Service (ERS). Rural Classifications. United States Department of Agriculture. <https://www.ers.usda.gov/topics/rural-economy-population/rural-classifications/>. Published 2019. Updated October 23, 2019. Accessed.
13. Barrett M, Coffey, R, Houchens, R, Heslin, K, Moles, E, Coenen, N. *Methods Applying AHRQ Quality Indicators to Healthcare Cost and Utilization Project (HCUP) Data for the 2017 National Healthcare Quality and Disparities Report (QDR)*. U.S. Agency for Healthcare Research and Quality; May 11, 2018 2018.
14. Lumley T. Analysis of complex survey samples. *J Stat Softw*. 2004;9(1):1-19.
15. Vaduganathan M, De Palma G, Manerba A, et al. Risk of Cardiovascular Hospitalizations from Exposure to Coarse Particulate Matter (PM10) Below the European Union Safety Threshold. *Am J Cardiol*. 2016;117(8):1231-1235.
16. Okubo Y, Handa A. National trend survey of hospitalized patients with febrile seizure in the United States. *Seizure*. 2017;50:160-165.
17. Centers for Disease Control and Prevention National Center for Health Statistics. Underlying Cause of Death 1999-2018 on CDC WONDER Online Database, released in 2019. Data are from the Multiple Cause of Death Files, 1999-2018, as compiled from data provided by the 57 vital statistics jurisdictions through the Vital Statistics Cooperative Program. In: Data are from the

Multiple Cause of Death Files, 1999-2017, as compiled from data provided by the 57 vital statistics jurisdictions through the Vital Statistics Cooperative Program; 2018.

18. Roalfe AK, Holder RL, Wilson S. Standardisation of rates using logistic regression: a comparison with the direct method. *BMC Health Services Research*. 2008;8(1):275.
19. Gibson T, Casto A, Young J, Karnell L, Coenen N. *Impact of ICD-10-CM/PCS on Research Using Administrative Databases Report # 2016-02*. U.S. Agency for Healthcare Research and Quality; July 25, 2016 2016.
20. Newman SC. *Biostatistical methods in epidemiology*. Wiley Online Library; 2001.
